# Supplementary material for: Ecological Boundaries Drive Microbial Diversity and Spillover Risk in Mixed Pastoral Systems of Inner Mongolia
Source: Research Square preprint supplement (doi:10.21203/rs.3.rs-7765229/v1), 2025-10-07
Supplement: Supplementary file 1 [file 2c0c52dd0c75a4ea797dd3ab.xlsx]

## Sheet: Sheet1
Table S3. Vertebrate- and invertebrate-associated viruses identified in three types of small wild mammal, related to Figure 2.
a. virus abundance calculated as read counts per million sequence reads (RPM).
b. G1, G2, G3, G4, and G5 represent different libraries from the same host.
Virus.name	Virus.species	Virus.strains	Virus.taxo(order:family)	Sequence.length	Novelty	Genome.completeness	Cross-species.transmission	Zoonosis	GenBank.accession	Blastx.top.hit	Hit.identity	Sample.location	Host.order	Host.family	Host.genus	Host.species	Host.group	Sample.type	RPM
Xilingol_Ixodida_partitivirus_1-Xilingol_Dermacentor.silvarum_partiti_1	Xilingol_Ixodida_partitivirus_1	Xilingol_Dermacentor.silvarum_partiti_1	Durnavirales; Partitiviridae	1748	Known	partial	Yes	Unknown	UBZ25878	MZ493899.1 RNA-dependent RNA polymerase [Fusarium mangiferae partitivirus 2]	93.32	Xilingol	Ixodida	Ixodidae	Dermacentor	Dermacentor silvarum	G5	midgut	25
Xilingol_Lagomorpha_orthopicobirnavirus_1-Xilingol_Oryctolagus.cuniculus_orthopicobirna_1	Xilingol_Lagomorpha_orthopicobirnavirus_1	Xilingol_Oryctolagus.cuniculus_orthopicobirna_1	Durnavirales; Picobirnaviridae	904	Known	partial	Yes	Unknown	XHB07407	PP211203.1 MAG: RNA-dependent RNA polymerase [Apodemus agrarius picobirnavirus 3]	97.87	Xilingol	Lagomorpha	Leporidae	Oryctolagus	Oryctolagus cuniculus	G4	lung	383.252
Baotou_Ixodida_rhabdovirus_1-BT_Dermacentor.silvarum_rhabdo_1	Baotou_Ixodida_rhabdovirus_1	BT_Dermacentor.silvarum_rhabdo_1	Mononegavirales; Rhabdoviridae	2184	Known	partial	NO	Unknown	WAK77186	ON812563.1 MAG: RNA-dependent RNA polymerase [Rhabdoviridae sp.]	62.38	Baotou	Ixodida	Ixodidae	Dermacentor	Dermacentor silvarum	G4	midgut	32
Xilingol_Lagomorpha_rotavirus_1-Xilingol_Oryctolagus.cuniculus_rota_1	Xilingol_Lagomorpha_rotavirus_1	Xilingol_Oryctolagus.cuniculus_rota_1	Reovirales; Sedoreoviridae	414	Known	partial	Yes	Yes	WCR68136	ON565585.1 viroplasm RNA binding protein, partial [Rotavirus A]	100	Xilingol	Lagomorpha	Leporidae	Oryctolagus	Oryctolagus cuniculus	G4	lung	21
Baotou_Ixodida_jingmenvirus_1-BT_Dermacentor.silvarum_jingmen_1	Baotou_Ixodida_jingmenvirus_1	BT_Dermacentor.silvarum_jingmen_1	Amarillovirales; Flaviviridae	953	Known	partial	NO	Yes	WZE65667	PP623761.1 VP2 protein [Alongshan virus]	82	Baotou	Ixodida	Ixodidae	Dermacentor	Dermacentor silvarum	G4	midgut	21
Hohhot_Passeriformes_pegivirus_1-Hohhot_Passer.montanus._pegi_1	Hohhot_Passeriformes_pegivirus_1	Hohhot_Passer.montanus._pegi_1	Amarillovirales; Flaviviridae	812	Known	partial	Yes	Unknown	WPR17472	OQ986610.1 MAG: non-structural polyprotein [Fernbird pegivirus 1]	92	Hohhot	Passeriformes	Passeridae	Passer	Passer montanus(Eurasian tree sparrow)	G1	lung	1.07766
Hohhot_Passeriformes_pegivirus_2-Hohhot_Passer.montanus._pegi_2	Hohhot_Passeriformes_pegivirus_2	Hohhot_Passer.montanus._pegi_2	Amarillovirales; Flaviviridae	1064	Known	partial	Yes	Unknown	QUE43478	MW365447.1 polyprotein [Goose pegivirus 2]	88.92	Hohhot	Passeriformes	Passeridae	Passer	Passer montanus(Eurasian tree sparrow)	G1	lung	37
Xilingol_pigeon_hepacivirus_1	Xilingol_Columbiformes_hepacivirus_1	Xilingol_Columba.livia_hepaci_1	Amarillovirales; Flaviviridae	9897	Novel	complete	Yes	Unknown	QHD25538	MN133813.1 polyprotein [Jogalong virus]	52.4	Xilingol	Columbiformes	Columbidae	Columba	Columba livia	G3	lung	16.5308
Baotou_pigeon_hepacivirus	Baotou_Columbiformes_hepacivirus_1	BT_Columba.livia_hepaci_1	Amarillovirales; Flaviviridae	9960	Novel	complete	Yes	Unknown	QHD25538	MN133813.1 polyprotein [Jogalong virus]	52.1	Baotou	Columbiformes	Columbidae	Columba	Columba livia	G4	lung	71
Hohhot_Rodentia_hepacivirus_1-Hohhot_Spermophilus.dauricus_hepaci_1	Hohhot_Rodentia_hepacivirus_1	Hohhot_Spermophilus.dauricus_hepaci_1	Amarillovirales; Flaviviridae	3563	Known	partial	Yes	Unknown	YP_009553586	NC_040815.1 polyprotein [Hepacivirus P]	74.32	Hohhot	Rodentia	Sciuridae	Spermophilus	Spermophilus dauricus	G1	lung	10.9188
Ordos_Rodentia_hepacivirus_1-Ordos_Spermophilus.dauricus_hepaci_1	Ordos_Rodentia_hepacivirus_1	Ordos_Spermophilus.dauricus_hepaci_1	Amarillovirales; Flaviviridae	4705	Known	partial	Yes	Unknown	YP_009553586	NC_040815.1 polyprotein [Hepacivirus P]	80.37	Ordos	Rodentia	Sciuridae	Spermophilus	Spermophilus dauricus	G2	lung	6.3399
Baotou_Rodentia_hepacivirus_1-BT_Spermophilus.dauricus_hepaci_1	Baotou_Rodentia_hepacivirus_1	BT_Spermophilus.dauricus_hepaci_1	Amarillovirales; Flaviviridae	3072	Known	partial	Yes	Unknown	YP_009553586	NC_040815.1 polyprotein [Hepacivirus P]	78.89	Baotou	Rodentia	Sciuridae	Spermophilus	Spermophilus dauricus	G3	lung	12980.8
Xilingol_Rodentia_hepacivirus_1-Xilingol_Spermophilus.dauricus_hepaci_1	Xilingol_Rodentia_hepacivirus_1	Xilingol_Spermophilus.dauricus_hepaci_1	Amarillovirales; Flaviviridae	3562	Known	partial	Yes	Unknown	YP_009553586	NC_040815.1 polyprotein [Hepacivirus P]	79.9	Xilingol	Rodentia	Sciuridae	Spermophilus	Spermophilus dauricus	G4	lung	19325.4
Hohhot_Diptera_flavivirus_1-Hohhot_Aedes.spp._flavi_1	Hohhot_Diptera_flavivirus_1	Hohhot_Aedes.spp._flavi_1	Amarillovirales; Flaviviridae	657	Known	partial	Yes	Unknown	YP_009389296	NC_035187.1 polyprotein [Mac Peak virus]	77.21	Hohhot	Diptera	Culicidae	Aedes	Aedes sp.	G1	whole body	2.56178
Hohhot_Diptera_orthoflavivirus_1-Hohhot_Aedes.spp._orthoflavi_1	Hohhot_Diptera_orthoflavivirus_1	Hohhot_Aedes.spp._orthoflavi_1	Amarillovirales; Flaviviridae	481	Known	partial	Yes	Unknown	UUV42161.1	ON949931.1 MAG: polyprotein [Kilpisjarvi flavivirus]	68.25	Hohhot	Diptera	Culicidae	Aedes	Aedes sp.	G1	whole body	2.70651
Hohhot_Diptera_orthoflavivirus_2-Hohhot_Aedes.spp._orthoflavi_2	Hohhot_Diptera_orthoflavivirus_2	Hohhot_Aedes.spp._orthoflavi_2	Amarillovirales; Flaviviridae	3626	Known	partial	Yes	Unknown	YP_009268624	YP_009259489.1 nonstructural protein NS3 [Hanko virus]	87.32	Hohhot	Diptera	Culicidae	Aedes	Aedes sp.	G1	whole body	33.8531
Ordos_Diptera_orthoflavivirus_1-Ordos_Aedes.spp._orthoflavi_1	Ordos_Diptera_orthoflavivirus_1	Ordos_Aedes.spp._orthoflavi_1	Amarillovirales; Flaviviridae	3532	Known	partial	Yes	Unknown	YP_009268624	YP_009259489.1 nonstructural protein NS3 [Hanko virus]	87.32	Ordos	Diptera	Culicidae	Aedes	Aedes sp.	G2	whole body	9.1838
Ordos_Aedes_flavivirus_1	Ordos_Diptera_flavivirus_1	Ordos_Aedes.spp._flavi_1	Amarillovirales; Flaviviridae	13061	Novel	complete	No	Unknown	BBQ05092	LC514290.1 polyprotein, partial [Aedes tritaeniorhynchus flavi-like virus]	42.55	Ordos	Diptera	Culicidae	Aedes	Aedes sp.	G2	whole body	530.567
Ordos_Diptera_flavivirus_2-Ordos_Aedes.spp._flavi_2	Ordos_Diptera_flavivirus_2	Ordos_Aedes.spp._flavi_2	Amarillovirales; Flaviviridae	5748	Known	partial	No	Unknown	BBQ05092	LC514290.1 polyprotein, partial [Aedes tritaeniorhynchus flavi-like virus]	41.45	Ordos	Diptera	Culicidae	Aedes	Aedes sp.	G2	whole body	54.9632
Hohhot_Primates_pegivirus_1-Hohhot_Homo.sp._pegi_1	Hohhot_Primates_pegivirus_1	Hohhot_Homo.sp._pegi_1	Amarillovirales; Flaviviridae	6498	Known	partial	No	Yes	NP_043570	NC_001710.1 polyprotein precursor [GB virus C]	97.52	Hohhot	Primates	Hominidae	Homo	Homo sp.	G5	blood	571
Hohhot_Primates_pegivirus_2-Hohhot_Homo.sp._pegi_2	Hohhot_Primates_pegivirus_2	Hohhot_Homo.sp._pegi_2	Amarillovirales; Flaviviridae	1028	Known	partial	No	Yes	BAA23720	AB009025.1 polyprotein, partial [GB virus C]	97.04	Hohhot	Primates	Hominidae	Homo	Homo sp.	G5	blood	51
Xilingol_Artiodactyla_pestivirus_1-Xilingol_Bos.taurus_pesti_1	Xilingol_Artiodactyla_pestivirus_1	Xilingol_Bos.taurus_pesti_1	Amarillovirales; Flaviviridae	12087	Known	complete	No	Yes	QBA90208	MH410814.1 polyprotein [HoBi-like pestivirus]	96.85	Xilingol	Artiodactyla	Bovidae	Bos	Bos taurus	G12	lung	133
Xilingol_Artiodactyla_pestivirus_2-Xilingol_Bos.taurus_pesti_2	Xilingol_Artiodactyla_pestivirus_2	Xilingol_Bos.taurus_pesti_2	Amarillovirales; Flaviviridae	11697	Known	complete	No	Yes	QPJ59880	MW014288.1 polyprotein [Bovine viral diarrhea virus 1]	88.27	Xilingol	Artiodactyla	Bovidae	Bos	Bos taurus	G12	lung	45
Ordos_Rodentia_hepacivirus_2-Ordos_Mus.musculus_hepaci_2	Ordos_Rodentia_hepacivirus_2	Ordos_Mus.musculus_hepaci_2	Amarillovirales; Flaviviridae	459	Known	partial	No	Yes	ATP66830	KY370092.1 polyprotein, partial [Rodent hepacvirus]	99.32	Ordos	Rodentia	Muridae	Mus	Mus musculus	G2	lung	22
Hohhot_Ixodida_flavivirus_1-Hohhot_Dermacentor.silvarum_flavi_1	Hohhot_Ixodida_flavivirus_1	Hohhot_Dermacentor.silvarum_flavi_1	Amarillovirales; Flaviviridae	777	Known	partial	No	Unknown	XBC28404	OR166561.1 polyprotein, partial [Flaviviridae sp.]	75.81	Hohhot	Ixodida	Ixodidae	Dermacentor	Dermacentor silvarum	G1	midgut	38
Hohhot_Diptera_quaranjavirus_1-Hohhot_Aedes.spp._quaranja_1	Hohhot_Diptera_quaranjavirus_1	Hohhot_Aedes.spp._quaranja_1	Articulavirales; Orthomyxoviridae	860	Known	partial	No	Unknown	QRW42472	MW434450.1 MAG: hypothetical protein [Wuhan Mosquito Virus 6]	52.04	Hohhot	Diptera	Culicidae	Aedes	Aedes sp.	G1	whole body	8.14848
Hohhot_Diptera_orthomyxovirus_1-Hohhot_Aedes.spp._orthomyxo_1	Hohhot_Diptera_orthomyxovirus_1	Hohhot_Aedes.spp._orthomyxo_1	Articulavirales; Orthomyxoviridae	541	Known	partial	Yes	Unknown	UUG74233	OL700154.1 MAG: polymerase PB1, partial [XiangYun orthomyxo-like virus 2]	99.44	Hohhot	Diptera	Culicidae	Aedes	Aedes sp.	G1	whole body	26
Ordos_Diptera_quaranjavirus_1-Ordos_Aedes.spp._quaranja_1	Ordos_Diptera_quaranjavirus_1	Ordos_Aedes.spp._quaranja_1	Articulavirales; Orthomyxoviridae	2205	Known	partial	No	Unknown	QRW42428	MW434406.1 MAG: polymerase PA [Wuhan Mosquito Virus 6]	94.9	Ordos	Diptera	Culicidae	Aedes	Aedes sp.	G2	whole body	24.8856
Hohhot_Ixodida_orthomyxovirus_1-Hohhot_Dermacentor.silvarum_orthomyxo_1	Hohhot_Ixodida_orthomyxovirus_1	Hohhot_Dermacentor.silvarum_orthomyxo_1	Articulavirales; Orthomyxoviridae	2043	Known	partial	Yes	Unknown	UYL95486	ON746458.1 MAG: polymerase basic 1 protein [Linzhi Ortho tick virus 1]	86.39	Hohhot	Ixodida	Ixodidae	Dermacentor	Dermacentor silvarum	G1	midgut	26
Hohhot_Passeriformes_avihepadnavirus_1-Hohhot_Passer.montanus._avihepadna_1	Hohhot_Passeriformes_avihepadnavirus_1	Hohhot_Passer.montanus._avihepadna_1	Blubervirales; Hepadnaviridae	591	Known	partial	Yes	Yes	AGM48071	KC698962.1 DNA polymerase, partial [Duck hepatitis B virus]	64.75	Hohhot	Passeriformes	Passeridae	Passer	Passer montanus(Eurasian tree sparrow)	G1	lung	12
Hohhot_Passeriformes_avihepadnavirus_2-Hohhot_Passer.montanus._avihepadna_2	Hohhot_Passeriformes_avihepadnavirus_2	Hohhot_Passer.montanus._avihepadna_2	Blubervirales; Hepadnaviridae	3864	Known	partial	Yes	Yes	YP_031695	NC_005950.1 DNA-directed DNA polymerase [Snow goose hepatitis B virus]	43.94	Hohhot	Passeriformes	Passeridae	Passer	Passer montanus(Eurasian tree sparrow)	G1	lung	3037.79
Hohhot_Passeriformes_avihepadnavirus_3-Hohhot_Passer.montanus._avihepadna_3	Hohhot_Passeriformes_avihepadnavirus_3	Hohhot_Passer.montanus._avihepadna_3	Blubervirales; Hepadnaviridae	5463	Known	partial	Yes	Yes	WDY73531	OP762439.1 polymerase [Duck hepatitis B virus]	42.74	Hohhot	Passeriformes	Passeridae	Passer	Passer montanus(Eurasian tree sparrow)	G2	lung	23.2984
Baotou_Passeriformes_avihepadnavirus_1-BT_Passer.montanus._avihepadna_1	Baotou_Passeriformes_avihepadnavirus_1	BT_Passer.montanus._avihepadna_1	Blubervirales; Hepadnaviridae	3423	Known	partial	Yes	Yes	WDY73531	OP762439.1 polymerase [Duck hepatitis B virus]	41.83	Baotou	Passeriformes	Passeridae	Passer	Passer montanus(Eurasian tree sparrow)	G4	lung	17.6334
Hohhot_Pelecaniformes_orthohepadnavirus_1-Hohhot_Egretta.garzetta_orthohepadna_1	Hohhot_Pelecaniformes_orthohepadnavirus_1	Hohhot_Egretta.garzetta_orthohepadna_1	Blubervirales; Hepadnaviridae	1371	Known	partial	Yes	Yes	QBL54977	MK173229.1 polymerase, partial [Hepatitis B virus]	35.71	Hohhot	Pelecaniformes	Ardeidae	Egretta	Egretta garzetta	G1	lung	73
Hohhot_Pelecaniformes_orthohepadnavirus_2-Hohhot_Egretta.garzetta_orthohepadna_2	Hohhot_Pelecaniformes_orthohepadnavirus_2	Hohhot_Egretta.garzetta_orthohepadna_2	Blubervirales; Hepadnaviridae	539	Known	partial	Yes	Yes	AYU58612	MH716822.1 RNA-dependent RNA-polymerase [Eastern sea garfish hepatitis B virus]	49.21	Hohhot	Pelecaniformes	Ardeidae	Egretta	Egretta garzetta	G1	lung	24
Hohhot_Pelecaniformes_metahepadnavirus_1-Hohhot_Egretta.garzetta_metahepadna_1	Hohhot_Pelecaniformes_metahepadnavirus_1	Hohhot_Egretta.garzetta_metahepadna_1	Blubervirales; Hepadnaviridae	611	Known	partial	Yes	Unknown	WLN26296	OR350330.1 MAG: surface protein, partial [Lamprologini metahepadnavirus]	51.58	Hohhot	Pelecaniformes	Ardeidae	Egretta	Egretta garzetta	G3	lung	33
Hohhot_Pelecaniformes_orthohepadnavirus_3-Hohhot_Egretta.garzetta_orthohepadna_3	Hohhot_Pelecaniformes_orthohepadnavirus_3	Hohhot_Egretta.garzetta_orthohepadna_3	Blubervirales; Hepadnaviridae	1341	Known	partial	Yes	Yes	XBP46448	PP590690.1 MAG: RNA-dependent RNA-polymerase, partial [Scaly rockcod hepatitis B virus]	43.08	Hohhot	Pelecaniformes	Ardeidae	Egretta	Egretta garzetta	G3	lung	80
Hohhot_Pelecaniformes_metahepadnavirus_2-Hohhot_Egretta.garzetta_metahepadna_2	Hohhot_Pelecaniformes_metahepadnavirus_2	Hohhot_Egretta.garzetta_metahepadna_2	Blubervirales; Hepadnaviridae	693	Known	partial	Yes	Yes	WLN26291.1	OR350314.1 MAG: RNA-dependent RNA-polymerase, partial [Scaly rockcod hepatitis B virus]	54.88	Hohhot	Pelecaniformes	Ardeidae	Egretta	Egretta garzetta	G3	lung	65
Hohhot_Strigiformes_orthohepadnavirus_1-Hohhot_Bubo.Bubo_orthohepadna_1	Hohhot_Strigiformes_orthohepadnavirus_1	Hohhot_Bubo.Bubo_orthohepadna_1	Blubervirales; Hepadnaviridae	581	Known	partial	Yes	Unknown	WPS63810	NC_024450.1 MAG: polymerase, partial [Ardenna hepatitis B-like virus]	84.42	Hohhot	Strigiformes	Strigidae	Bubo	Bubo Bubo	G1	lung	312.227
Hohhot_Strigiformes_hepadnavirus_1-Hohhot_Bubo.Bubo_hepadna_1	Hohhot_Strigiformes_hepadnavirus_1	Hohhot_Bubo.Bubo_hepadna_1	Blubervirales; Hepadnaviridae	857	Known	partial	Yes	Unknown	WXG22997	PP002550.1 MAG: reverse transcriptase ribonuclease H, partial [Shwaciful virus 1]	44.04	Hohhot	Strigiformes	Strigidae	Bubo	Bubo Bubo	G2	lung	32
Hohhot_Accipitriformes_avihepadnavirus_1-Hohhot_Circus.cyaneus_avihepadna_1	Hohhot_Accipitriformes_avihepadnavirus_1	Hohhot_Circus.cyaneus_avihepadna_1	Blubervirales; Hepadnaviridae	770	Known	partial	Yes	Yes	AAR89939	AY494852.1 polymerase protein [Sheldgoose hepatitis B virus]	43.66	Hohhot	Accipitriformes	Accipitridae	Circus	Circus cyaneus	G1	lung	71
Hohhot_Accipitriformes_orthohepadnavirus_1-Hohhot_Circus.cyaneus_orthohepadna_1	Hohhot_Accipitriformes_orthohepadnavirus_1	Hohhot_Circus.cyaneus_orthohepadna_1	Blubervirales; Hepadnaviridae	905	Known	partial	Yes	Unknown	XOB76007	PQ678075.1 MAG: pre-core protein [Yunnan rodent orthohepadnavirus 1]	66.67	Hohhot	Accipitriformes	Accipitridae	Circus	Circus cyaneus	G3	lung	74
Hohhot_Accipitriformes_avihepadnavirus_2-Hohhot_Circus.cyaneus_avihepadna_2	Hohhot_Accipitriformes_avihepadnavirus_2	Hohhot_Circus.cyaneus_avihepadna_2	Blubervirales; Hepadnaviridae	811	Known	partial	Yes	Yes	WHB10634	OP850044.1 polymerase [Duck hepatitis B virus]	40.68	Hohhot	Accipitriformes	Accipitridae	Circus	Circus cyaneus	G3	lung	63
Hohhot_Otidiformes_avihepadnavirus_1-Hohhot_Otis.tarda_avihepadna_1	Hohhot_Otidiformes_avihepadnavirus_1	Hohhot_Otis.tarda_avihepadna_1	Blubervirales; Hepadnaviridae	663	Known	partial	Yes	Yes	YP_031695	NC_005950.1 DNA-directed DNA polymerase [Snow goose hepatitis B virus]	46.07	Hohhot	Otidiformes	Otididae	Otis	Otis tarda	G1	lung	64
Ordos_Aedes_bunyavirus_1	Ordos_Diptera_phasmavirus_1	Ordos_Aedes.spp._phasma_1	Elliovirales; Phasmaviridae	6586	Novel	partial	Yes	Unknown	YP_009553313	NC_040759.1 RNA-dependent RNA polymerase [Yongsan bunyavirus 1]	61.53	Ordos	Diptera	Culicidae	Aedes	Aedes sp.	G2	whole body	262.422
Ordos_Diptera_bunyavirus_2-Ordos_Aedes.spp._bunya_2	Ordos_Diptera_bunyavirus_2	Ordos_Aedes.spp._bunya_2	Bunyavirales	2334	Known	partial	Yes	Unknown	AXV43872	MH703046.1 glycoprotein precursor, partial [Yongsan bunyavirus 1]	53.56	Ordos	Diptera	Culicidae	Aedes	Aedes sp.	G2	whole body	1289.29
Baotou_Ixodida_bunyavirus_1-BT_Dermacentor.silvarum_bunya_1	Baotou_Ixodida_bunyavirus_1	BT_Dermacentor.silvarum_bunya_1	Bunyavirales	3019	Known	partial	No	Unknown	QVG74689	MW199199.1 L protein [Bunyavirales sp.]	56.98	Baotou	Ixodida	Ixodidae	Dermacentor	Dermacentor silvarum	G4	midgut	8
Hohhot_Pelecaniformes_cyclovirus_1-Hohhot_Egretta.garzetta_cyclo_1	Hohhot_Pelecaniformes_cyclovirus_1	Hohhot_Egretta.garzetta_cyclo_1	Cirlivirales; Circoviridae	1074	Known	partial	Yes	Unknown	YP_010805777	NC_077200.1 replication-associated protein [Army ant associated cyclovirus 1]	48.72	Hohhot	Pelecaniformes	Ardeidae	Egretta	Egretta garzetta	G2	lung	86
Hohhot_Pelecaniformes_cyclovirus_2-Hohhot_Egretta.garzetta_cyclo_2	Hohhot_Pelecaniformes_cyclovirus_2	Hohhot_Egretta.garzetta_cyclo_2	Cirlivirales; Circoviridae	509	Known	partial	Yes	Unknown	YP_010805777	NC_077200.1 replication-associated protein [Army ant associated cyclovirus 1]	48.72	Hohhot	Pelecaniformes	Ardeidae	Egretta	Egretta garzetta	G3	lung	28
Ordos_Columbiformes_circovirus_1-Ordos_Columba.livia_circo_1	Ordos_Columbiformes_circovirus_1	Ordos_Columba.livia_circo_1	Cirlivirales; Circoviridae	2262	Known	partial	No	Unknown	QSX73407	MW656152.1 capsid protein [Pigeon circovirus]	93.57	Ordos	Columbiformes	Columbidae	Columba	Columba livia	G1	lung	62.1877
Baotou_Columbiformes_circovirus_1-BT_Columba.livia_circo_1	Baotou_Columbiformes_circovirus_1	BT_Columba.livia_circo_1	Cirlivirales; Circoviridae	2092	Known	partial	No	Unknown	UBV61970	MW181975.1 replication-associated protein [Pigeon circovirus]	99.68	Baotou	Columbiformes	Columbidae	Columba	Columba livia	G3	lung	60
Baotou_Artiodactyla_mitovirus_1-BT_Bos.taurus_mito_1	Baotou_Artiodactyla_mitovirus_1	BT_Bos.taurus_mito_1	Cryppavirales Mitoviridae	317	Known	partial	Yes	Unknown	DBA06311	BK062832.1 TPA_asm: RdRp [Polycarpa mytiligera associated mitovirus 1]	46.15	Baotou	Artiodactyla	Bovidae	Bos	Bos taurus	G11	lung	16
Hohhot_Diptera_partitivirus_1-Hohhot_Aedes.spp._partiti_1	Hohhot_Diptera_partitivirus_1	Hohhot_Aedes.spp._partiti_1	Durnavirales; Partitiviridae	17683	Known	complete	Yes	Unknown	QRD99908	MW520413.1 MAG: capsid [Dragana partiti-like virus]	80.14	Hohhot	Diptera	Culicidae	Aedes	Aedes sp.	G1	whole body	408.799
Ordos_Diptera_partitivirus_1-Ordos_Aedes.spp._partiti_1	Ordos_Diptera_partitivirus_1	Ordos_Aedes.spp._partiti_1	Durnavirales; Partitiviridae	1500	Known	partial	Yes	Unknown	QRD99908	MW520413.1 MAG: capsid [Dragana partiti-like virus]	78.11	Ordos	Diptera	Culicidae	Aedes	Aedes sp.	G2	whole body	261.054
Ordos_Diptera_alphapartitivirus_1-Ordos_Aedes.spp._alphapartiti_1	Ordos_Diptera_alphapartitivirus_1	Ordos_Aedes.spp._alphapartiti_1	Durnavirales; Partitiviridae	1117	Known	partial	Yes	Unknown	UUV42387	OP019970.1 MAG: putative RNA dependent RNA polymerase [Palkane alphapartitivirus 2]	89.24	Ordos	Diptera	Culicidae	Aedes	Aedes sp.	G2	whole body	4.25693
Ordos_Diptera_alphapartitivirus_2-Ordos_Aedes.spp._alphapartiti_2	Ordos_Diptera_alphapartitivirus_2	Ordos_Aedes.spp._alphapartiti_2	Durnavirales; Partitiviridae	731	Known	partial	Yes	Unknown	UUV42346	OP019930.1 MAG: putative RNA dependent RNA polymerase [Hanko alphapartitivirus 1]	95.45	Ordos	Diptera	Culicidae	Aedes	Aedes sp.	G2	whole body	2.47041
Hohhot_Ixodida_partitivirus_1-Hohhot_Dermacentor.silvarum_partiti_1	Hohhot_Ixodida_partitivirus_1	Hohhot_Dermacentor.silvarum_partiti_1	Durnavirales; Partitiviridae	2327	Known	partial	Yes	Unknown	WAK75582	ON812088.1 MAG: hypothetical protein, partial [Partitiviridae sp.]	32.83	Hohhot	Ixodida	Ixodidae	Dermacentor	Dermacentor silvarum	G1	midgut	19
Xilingol_Columbiformes_orthopicobirnavirus_1-Xilingol_Columba.livia_orthopicobirna_1	Xilingol_Columbiformes_orthopicobirnavirus_1	Xilingol_Columba.livia_orthopicobirna_1	Durnavirales; Picobirnaviridae	853	Known	partial	Yes	Unknown	XHB07407	PP211203.1 MAG: RNA-dependent RNA polymerase [Apodemus agrarius picobirnavirus 3]	97.82	Xilingol	Columbiformes	Columbidae	Columba	Columba livia	G4	lung	1214.96
Hohhot_Diptera_orthophasmavirus_1-Hohhot_Aedes.spp._orthophasma_1	Hohhot_Diptera_orthophasmavirus_1	Hohhot_Aedes.spp._orthophasma_1	Elliovirales; Phasmaviridae	3421	Known	partial	NO	Unknown	YP_009305131	NC_031308.1 glycoprotein precursor [Wuhan mosquito virus 1]	92	Hohhot	Diptera	Culicidae	Aedes	Aedes sp.	G1	whole body	91.4858
Hohhot_Diptera_orthophasmavirus_2-Hohhot_Aedes.spp._orthophasma_2	Hohhot_Diptera_orthophasmavirus_2	Hohhot_Aedes.spp._orthophasma_2	Elliovirales; Phasmaviridae	2065	Known	partial	Yes	Unknown	YP_010840334	NC_078624.1 nucleocapsid protein [Coredo virus]	46.35	Hohhot	Diptera	Culicidae	Aedes	Aedes sp.	G1	whole body	2.85124
Ordos_Diptera_orthophasmavirus_1-Ordos_Aedes.spp._orthophasma_1	Ordos_Diptera_orthophasmavirus_1	Ordos_Aedes.spp._orthophasma_1	Elliovirales; Phasmaviridae	1095	Known	partial	No	Unknown	YP_009305131	NC_031308.1 glycoprotein precursor [Wuhan mosquito virus 1]	76.8	Ordos	Diptera	Culicidae	Aedes	Aedes sp.	G2	whole body	1.91213
Ordos_Diptera_orthophasmavirus_2-Ordos_Aedes.spp._orthophasma_2	Ordos_Diptera_orthophasmavirus_2	Ordos_Aedes.spp._orthophasma_2	Elliovirales; Phasmaviridae	716	Known	partial	No	Unknown	XUU15048	PV274275.1 MAG: RNA-dependent RNA polymerase, partial [Orthophasmavirus sp.]	71.01	Ordos	Diptera	Culicidae	Aedes	Aedes sp.	G2	whole body	170.403
Xilingol_Artiodactyla_orthotospovirus_1-Xilingol_Bos.taurus_orthotospo_1	Xilingol_Artiodactyla_orthotospovirus_1	Xilingol_Bos.taurus_orthotospo_1	Elliovirales; Tospoviridae	368	Known	partial	Yes	Unknown	AEM43797	HQ914645.1 nucleocapsid, partial [Orthotospovirus tomatomaculae]	99.18	Xilingol	Artiodactyla	Bovidae	Bos	Bos taurus	G12	lung	32
Ordos_Diptera_insevirus_1-Ordos_Aedes.spp._inse_1	Ordos_Diptera_insevirus_1	Ordos_Aedes.spp._inse_1	Ghabrivirales; Inseviridae	6134	Known	partial	Yes	Unknown	QIJ25845	MN784057.1 capsid, partial [Australian Anopheles totivirus]	75.82	Ordos	Diptera	Culicidae	Aedes	Aedes sp.	G2	whole body	4.75939
Hohhot_Ixodida_insevirus_1-Hohhot_Dermacentor.silvarum_inse_1	Hohhot_Ixodida_insevirus_1	Hohhot_Dermacentor.silvarum_inse_1	Ghabrivirales; Inseviridae	1096	Known	partial	No	Unknown	YP_009336908	NC_032938.1 hypothetical protein 2 [Hubei toti-like virus 24]	57.75	Hohhot	Ixodida	Ixodidae	Dermacentor	Dermacentor silvarum	G1	midgut	19
Ordos_Diptera_orthototivirus_1-Ordos_Aedes.spp._orthototi_1	Ordos_Diptera_orthototivirus_1	Ordos_Aedes.spp._orthototi_1	Ghabrivirales; Orthototiviridae	1739	Known	partial	Yes	Unknown	UUV42237	OP019866.1 MAG: putative RNA dependent RNA polymerase [Hanko totivirus 9]	75.09	Ordos	Diptera	Culicidae	Aedes	Aedes sp.	G2	whole body	21.5638
Ordos_Diptera_orthototivirus_2-Ordos_Aedes.spp._orthototi_2	Ordos_Diptera_orthototivirus_2	Ordos_Aedes.spp._orthototi_2	Ghabrivirales; Orthototiviridae	1678	Known	partial	Yes	Unknown	UUV42225	OP019860.1 MAG: putative capsid protein [Hanko toti-like virus 2]	89.8	Ordos	Diptera	Culicidae	Aedes	Aedes sp.	G2	whole body	40.5874
Ordos_Diptera_orthototivirus_3-Ordos_Aedes.spp._orthototi_3	Ordos_Diptera_orthototivirus_3	Ordos_Aedes.spp._orthototi_3	Ghabrivirales; Orthototiviridae	3772	Known	partial	Yes	Unknown	UUV42552	OP020108.1 MAG: RNA dependent RNA polymerase [Kustavi toti-like virus]	92.61	Ordos	Diptera	Culicidae	Aedes	Aedes sp.	G2	whole body	143.619
Hohhot_Ixodida_orthototivirus_1-Hohhot_Dermacentor.silvarum_orthototi_1	Hohhot_Ixodida_orthototivirus_1	Hohhot_Dermacentor.silvarum_orthototi_1	Ghabrivirales; Orthototiviridae	1155	Known	partial	No	Unknown	QBQ65052	MH688675.1 polymerase, partial [Xinjiang tick totivirus 2]	59.57	Hohhot	Ixodida	Ixodidae	Dermacentor	Dermacentor silvarum	G2	midgut	101
Hohhot_Diptera_spicivirus_1-Hohhot_Aedes.spp._spici_1	Hohhot_Diptera_spicivirus_1	Hohhot_Aedes.spp._spici_1	Ghabrivirales; Spiciviridae	7668	known	complete	Yes	Unknown	QEM39133	MN053721.1 RNA-dependent RNA polymerase [Aedes aegypti toti-like virus]	59.4	Hohhot	Diptera	Culicidae	Aedes	Aedes sp.	G1	whole body	81.644
Hohhot_Passeriformes_totivirus_1-Hohhot_Passer.montanus._toti_1	Hohhot_Passeriformes_totivirus_1	Hohhot_Passer.montanus._toti_1	Ghabrivirales; Totiviridae	1778	Known	complete	Yes	Unknown	WWV90316.1	OR870969.1 MAG: RNA polymerase, partial [Totiviridae sp.]	43.81	Hohhot	Passeriformes	Passeridae	Passer	Passer montanus(Eurasian tree sparrow)	G1	lung	1.07766
Hohhot_Diptera_totivirus_1-Hohhot_Aedes.spp._toti_1	Hohhot_Diptera_totivirus_1	Hohhot_Aedes.spp._toti_1	Ghabrivirales; Totiviridae	11366	Known	complete	Yes	Unknown	WPK42838	OR367341.1 MAG: capsid protein, partial [Ramu Anopheles Totivirus]	73.75	Hohhot	Diptera	Culicidae	Aedes	Aedes sp.	G1	whole body	568.237
Hohhot_Diptera_totivirus_2-Hohhot_Aedes.spp._toti_2	Hohhot_Diptera_totivirus_2	Hohhot_Aedes.spp._toti_2	Ghabrivirales; Totiviridae	3716	Known	partial	Yes	Unknown	YP_010839746	NC_078087.1 putative VP1 [Mosquito X virus]	99.2	Hohhot	Diptera	Culicidae	Aedes	Aedes sp.	G1	whole body	49184.4
Xilingol_Ixodida_totivirus_1-Xilingol_Dermacentor.silvarum_toti_1	Xilingol_Ixodida_totivirus_1	Xilingol_Dermacentor.silvarum_toti_1	Ghabrivirales; Totiviridae	3081	Known	partial	Yes	Unknown	UYL95679	ON746558.1 MAG: RNA-dependent RNA polymerase [Hulunbuir Totiv tick virus 1]	85.51	Xilingol	Ixodida	Ixodidae	Dermacentor	Dermacentor silvarum	G5	midgut	85
Xilingol_Ixodida_totivirus_2-Xilingol_Dermacentor.silvarum_toti_2	Xilingol_Ixodida_totivirus_2	Xilingol_Dermacentor.silvarum_toti_2	Ghabrivirales; Totiviridae	4548	Known	partial	Yes	Unknown	XHY99505	PQ180664.1 MAG: hypothetical protein [Hulunbuir Totiv tick virus 1]	96.05	Xilingol	Ixodida	Ixodidae	Dermacentor	Dermacentor silvarum	G5	midgut	66
Baotou_Ixodida_totivirus_1-BT_Dermacentor.silvarum_toti_1	Baotou_Ixodida_totivirus_1	BT_Dermacentor.silvarum_toti_1	Ghabrivirales; Totiviridae	2428	Known	partial	Yes	Unknown	UYL95679	ON746558.1 MAG: RNA-dependent RNA polymerase [Hulunbuir Totiv tick virus 1]	86.84	Baotou	Ixodida	Ixodidae	Dermacentor	Dermacentor silvarum	G4	midgut	26
Xilingol_Artiodactyla_totivirus_1-Xilingol_Ovis.aries_toti_1	Xilingol_Artiodactyla_totivirus_1	Xilingol_Ovis.aries_toti_1	Ghabrivirales; Totiviridae	379	Known	partial	Yes	Unknown	QJA42333	MN603498.1 hypothetical protein MRV40S_001 [Malassezia restricta virus MrV40S]	84.47	Xilingol	Artiodactyla	Bovidae	Ovis	Ovis aries	G4	lung	20
Baotou_Ixodida_totivirus_2-BT_Dermacentor.silvarum_toti_2	Baotou_Ixodida_totivirus_2	BT_Dermacentor.silvarum_toti_2	Hareavirales; Nairoviridae	1058	Known	partial	Yes	Unknown	XJP49212	PQ475609.1 nucleocapsid protein [Yichun nairovirus]	66.67	Baotou	Ixodida	Ixodidae	Dermacentor	Dermacentor silvarum	G4	midgut	12
Hohhot_Diptera_phasivirus_1-Hohhot_Aedes.spp._phasi_1	Hohhot_Diptera_phasivirus_1	Hohhot_Aedes.spp._phasi_1	Hareavirales; Phenuiviridae	599	Known	partial	Yes	Unknown	UYL94377	ON955140.1 MAG: putative nucleocapsid protein [Hameenlinna phasivirus]	72.22	Hohhot	Diptera	Culicidae	Aedes	Aedes sp.	G1	whole body	40.2069
Ordos_Diptera_phasivirus_1-Ordos_Aedes.spp._phasi_1	Ordos_Diptera_phasivirus_1	Ordos_Aedes.spp._phasi_1	Hareavirales; Phenuiviridae	955	Known	partial	Yes	Unknown	UYL94377	ON955140.1 MAG: putative nucleocapsid protein [Hameenlinna phasivirus]	64.89	Ordos	Diptera	Culicidae	Aedes	Aedes sp.	G2	whole body	5.79221
Ordos_Diptera_mobuvirus_1-Ordos_Aedes.spp._mobu_1	Ordos_Diptera_mobuvirus_1	Ordos_Aedes.spp._mobu_1	Hareavirales; Phenuiviridae	2182	Known	partial	Yes	Unknown	XLV26755	PP076608.1 MAG: glycoprotein [Mobuvirus sp.]	50.46	Ordos	Diptera	Culicidae	Aedes	Aedes sp.	G2	whole body	1226.34
Baotou_Ixodida_hepevirus_1-BT_Dermacentor.silvarum_hepe_1	Baotou_Ixodida_hepevirus_1	BT_Dermacentor.silvarum_hepe_1	Hepelivirales; Hepeviridae	1874	Known	partial	Yes	Yes	WYW04504	PP473491.1 MAG: polyprotein, partial [Hepeviridae sp.]	99.68	Baotou	Ixodida	Ixodidae	Dermacentor	Dermacentor silvarum	G4	midgut	100
Baotou_Rodentia_orthoherpesvirus_1-BT_Spermophilus.dauricus_orthoherpes_1	Baotou_Rodentia_orthoherpesvirus_1	BT_Spermophilus.dauricus_orthoherpes_1	Herpesvirales; Orthoherpesviridae	505	Known	partial	Yes	Unknown	UNP64612	OK337615.1 hypothetical protein [Marmot herpesvirus 1]	63.97	Baotou	Rodentia	Sciuridae	Spermophilus	Spermophilus dauricus	G3	lung	2367.66
Baotou_Rodentia_orthoherpesvirus_2-BT_Spermophilus.dauricus_orthoherpes_2	Baotou_Rodentia_orthoherpesvirus_2	BT_Spermophilus.dauricus_orthoherpes_2	Herpesvirales; Orthoherpesviridae	535	Known	partial	Yes	Unknown	OK337614	OK337614.1 ribonucleotide reductase-like protein [Saguinine gammaherpesvirus 1]	87.5	Baotou	Rodentia	Sciuridae	Spermophilus	Spermophilus dauricus	G3	lung	1.6852
Hohhot_Strigiformes_mardivirus_1-Hohhot_Bubo.Bubo_mardi_1	Hohhot_Strigiformes_mardivirus_1	Hohhot_Bubo.Bubo_mardi_1	Herpesvirales; Orthoherpesviridae	9646	Known	complete	Yes	Unknown	YP_009046572	NC_024450.1 transcriptional regulator ICP4 [Falconid herpesvirus 1]	99.02	Hohhot	Strigiformes	Strigidae	Bubo	Bubo Bubo	G1	lung	12.4137
Hohhot_Strigiformes_mardivirus_2-Hohhot_Bubo.Bubo_mardi_2	Hohhot_Strigiformes_mardivirus_2	Hohhot_Bubo.Bubo_mardi_2	Herpesvirales; Orthoherpesviridae	4567	Known	partial	Yes	Unknown	YP_009352909	NC_034266.1 helicase-primase helicase subunit [Columbid alphaherpesvirus 1]	99.72	Hohhot	Strigiformes	Strigidae	Bubo	Bubo Bubo	G1	lung	1888.25
Hohhot_Strigiformes_mardivirus_3-Hohhot_Bubo.Bubo_mardi_3	Hohhot_Strigiformes_mardivirus_3	Hohhot_Bubo.Bubo_mardi_3	Herpesvirales; Orthoherpesviridae	831	Known	partial	Yes	Unknown	YP_009046537	NC_024450.1 ribonucleotide reductase subunit 1 [Falconid herpesvirus 1]	100	Hohhot	Strigiformes	Strigidae	Bubo	Bubo Bubo	G2	lung	1.68737
Hohhot_Strigiformes_mardivirus_4-Hohhot_Bubo.Bubo_mardi_4	Hohhot_Strigiformes_mardivirus_4	Hohhot_Bubo.Bubo_mardi_4	Herpesvirales; Orthoherpesviridae	678	Known	partial	Yes	Unknown	YP_009353003	NC_034266.1 envelope glycoprotein D [Columbid alphaherpesvirus 1]	99.49	Hohhot	Strigiformes	Strigidae	Bubo	Bubo Bubo	G2	lung	67
Xilingol_Galliformes_mardivirus_1-Xilingol_Gallus.gallus_mardi_1	Xilingol_Galliformes_mardivirus_1	Xilingol_Gallus.gallus_mardi_1	Herpesvirales; Orthoherpesviridae	968	Known	partial	No	Unknown	YP_010795580	NC_075702.1 R-LORF2 protein [Gallid alphaherpesvirus 3]	98.9	Xilingol	Galliformes	Phasianidae	Gallus	Gallus gallus	G2	lung	14
Baotou_Ixodida_mivirus_1-BT_Dermacentor.silvarum_mi_1	Baotou_Ixodida_mivirus_1	BT_Dermacentor.silvarum_mi_1	Jingchuvirales; Chuviridae	1286	Known	partial	No	Unknown	YP_009177219	NC_028243.1 putative glycoprotein [Suffolk virus]	85.98	Baotou	Ixodida	Ixodidae	Dermacentor	Dermacentor silvarum	G4	midgut	9
Hohhot_Diptera_culicidavirus_1-Hohhot_Aedes.spp._culicida_1	Hohhot_Diptera_culicidavirus_1	Hohhot_Aedes.spp._culicida_1	Jingchuvirales; Chuviridae	683	Known	partial	No	Unknown	YP_009182178	NC_028482.1 putative glycoprotein [Imjin River virus 1]	88.11	Hohhot	Diptera	Culicidae	Aedes	Aedes sp.	G1	whole body	7.85901
Hohhot_Diptera_chuvirus_1-Hohhot_Aedes.spp._chu_1	Hohhot_Diptera_chuvirus_1	Hohhot_Aedes.spp._chu_1	Jingchuvirales; Chuviridae	1106	Known	partial	Yes	Unknown	QPF16715	MT928173.1 glycoprotein, partial [Gurupi chuvirus-like 1]	78.33	Hohhot	Diptera	Culicidae	Aedes	Aedes sp.	G1	whole body	337.156
Ordos_Diptera_doliuvirus_1-Ordos_Aedes.spp._doliu_1	Ordos_Diptera_doliuvirus_1	Ordos_Aedes.spp._doliu_1	Jingchuvirales; Chuviridae	887	Known	partial	No	Unknown	API61889	API61889 hypothetical protein [Mos8Chu0 chuvirus]	55.97	Ordos	Diptera	Culicidae	Aedes	Aedes sp.	G2	whole body	93.3593
Ordos_Diptera_chuvirus_1-Ordos_Aedes.spp._chu_1	Ordos_Diptera_chuvirus_1	Ordos_Aedes.spp._chu_1	Jingchuvirales; Chuviridae	1310	Known	partial	Yes	Unknown	QPF16715	MT928173.1 glycoprotein, partial [Gurupi chuvirus-like 1]	80.24	Ordos	Diptera	Culicidae	Aedes	Aedes sp.	G2	whole body	24.9972
Hohhot_Diptera_doliuvirus_1-Hohhot_Aedes.spp._doliu_1	Hohhot_Diptera_doliuvirus_1	Hohhot_Aedes.spp._doliu_1	Jingchuvirales; Chuviridae	2386	Known	partial	No	Unknown	API61888	KX924631.1 glycoprotein [Mos8Chu0 chuvirus]	58.87	Hohhot	Diptera	Culicidae	Aedes	Aedes sp.	G1	whole body	365.784
Hohhot_Diptera_virgavirus_1-Hohhot_Aedes.spp._virga_1	Hohhot_Diptera_virgavirus_1	Hohhot_Aedes.spp._virga_1	Martellivirales; Virgaviridae	2430	Known	partial	Yes	Unknown	QHA33761	MN661118.1 hypothetical protein [Atrato Virga-like virus 6]	73.97	Hohhot	Diptera	Culicidae	Aedes	Aedes sp.	G1	whole body	2254.57
Ordos_Diptera_virgavirus_1-Ordos_Aedes.spp._virga_1	Ordos_Diptera_virgavirus_1	Ordos_Aedes.spp._virga_1	Martellivirales; Virgaviridae	509	Known	partial	Yes	Unknown	QHA33761	MN661118.1 hypothetical protein [Atrato Virga-like virus 6]	76.83	Ordos	Diptera	Culicidae	Aedes	Aedes sp.	G2	whole body	82.0122
Ordos_Diptera_virgavirus_2-Ordos_Aedes.spp._virga_2	Ordos_Diptera_virgavirus_2	Ordos_Aedes.spp._virga_2	Martellivirales; Virgaviridae	953	Known	partial	Yes	Unknown	QHA33753	MN661116.1 putative capsid protein [Atrato Virga-like virus 5]	86.96	Ordos	Diptera	Culicidae	Aedes	Aedes sp.	G2	whole body	20.4472
Ordos_Diptera_virgavirus_3-Ordos_Aedes.spp._virga_3	Ordos_Diptera_virgavirus_3	Ordos_Aedes.spp._virga_3	Martellivirales; Virgaviridae	2221	Known	partial	Yes	Unknown	QHD64722	MN551100.1 RdRp [Plasmopara viticola lesion associated virga-like virus 1]	33.11	Ordos	Diptera	Culicidae	Aedes	Aedes sp.	G2	whole body	5.20601
Xilingol_Columbiformes_orthoavulavirus_1-Xilingol_Columba.livia_orthoavula_1	Xilingol_Columbiformes_orthoavulavirus_1	Xilingol_Columba.livia_orthoavula_1	Mononegavirales; Paramyxoviridae	15847	Known	complete	Yes	Yes	YP_009513199	NC_039223.1 large polymerase protein [avian paramyxovirus 1]	97.82	Xilingol	Columbiformes	Columbidae	Columba	Columba livia	G4	lung	5289.53
Hohhot_Primates_orthorubulavirus_1-Hohhot_Homo.sp._orthorubula_1	Hohhot_Primates_orthorubulavirus_1	Hohhot_Homo.sp._orthorubula_1	Mononegavirales; Paramyxoviridae	1314	Known	partial	No	Yes	ANE10779	KX060176.1 NP [parainfluenza virus 5]	99.77	Hohhot	Primates	Hominidae	Homo	Homo sp.	G1	blood	267
Hohhot_Primates_orthorubulavirus_2-Hohhot_Homo.sp._orthorubula_2	Hohhot_Primates_orthorubulavirus_2	Hohhot_Homo.sp._orthorubula_2	Mononegavirales; Paramyxoviridae	8360	Known	partial	No	Yes	4XJN_A	AB009025.1 Chain A, Nucleocapsid [Mammalian orthorubulavirus 5]	98.63	Hohhot	Primates	Hominidae	Homo	Homo sp.	G5	blood	267
Xilingol_Artiodactyla_orthopneumovirus_1-Xilingol_Bos.taurus_orthopneumo_1	Xilingol_Artiodactyla_orthopneumovirus_1	Xilingol_Bos.taurus_orthopneumo_1	Mononegavirales; Pneumoviridae	15141	Known	complete	No	Yes	NP_048058	NC_001989.1 Polymerase protein [bovine respiratory syncytial virus]	98.33	Xilingol	Artiodactyla	Bovidae	Bos	Bos taurus	G12	lung	470
Hohhot_Aedes_merhavirus_1	Hohhot_Diptera_merhavirus_1	Hohhot_Aedes.spp._merha_1	Mononegavirales; Rhabdoviridae	13142	Novel	complete	Yes	Unknown	BEP11679	LC775065.1 RNA-dependent RNA polymerase [Armigeres subalbatus rhabdovirus]	55.36	Hohhot	Diptera	Culicidae	Aedes	Aedes sp.	G1	whole body	675.889
Hohhot_Diptera_merhavirus_2-Hohhot_Aedes.spp._merha_2	Hohhot_Diptera_merhavirus_2	Hohhot_Aedes.spp._merha_2	Mononegavirales; Rhabdoviridae	3320	Known	partial	Yes	Unknown	QRW41840	MW434770.1 MAG: nucleoprotein [Merida virus]	40.36	Hohhot	Diptera	Culicidae	Aedes	Aedes sp.	G1	whole body	27.7743
Hohhot_Diptera_merhavirus_3-Hohhot_Aedes.spp._merha_3	Hohhot_Diptera_merhavirus_3	Hohhot_Aedes.spp._merha_3	Mononegavirales; Rhabdoviridae	4934	Known	partial	Yes	Unknown	BEP11679	LC775065.1 RNA-dependent RNA polymerase [Armigeres subalbatus rhabdovirus]	54.66	Hohhot	Diptera	Culicidae	Aedes	Aedes sp.	G1	whole body	593.912
Hohhot_Diptera_rhabdovirus_1-Hohhot_Aedes.spp._rhabdo_1	Hohhot_Diptera_rhabdovirus_1	Hohhot_Aedes.spp._rhabdo_1	Mononegavirales; Rhabdoviridae	2800	Known	partial	Yes	Unknown	QHA33840	MN661110.1 putative nucleoprotein [Atrato Rhabdo-like virus 2]	39.34	Hohhot	Diptera	Culicidae	Aedes	Aedes sp.	G1	whole body	802.357
Hohhot_Diptera_rhabdovirus_2-Hohhot_Aedes.spp._rhabdo_2	Hohhot_Diptera_rhabdovirus_2	Hohhot_Aedes.spp._rhabdo_2	Mononegavirales; Rhabdoviridae	2731	Known	partial	Yes	Unknown	QRD99862	MW520372.1 MAG: RNA-dependent RNA polymerase [Evros rhabdovirus 2]	62.88	Hohhot	Diptera	Culicidae	Aedes	Aedes sp.	G1	whole body	1102.53
Hohhot_Diptera_rhabdovirus_3-Hohhot_Aedes.spp._rhabdo_3	Hohhot_Diptera_rhabdovirus_3	Hohhot_Aedes.spp._rhabdo_3	Mononegavirales; Rhabdoviridae	7738	Known	partial	Yes	Unknown	WPK42857	OR367398.1 MAG: RNA-dependent RNA polymerase, partial [Ramu Anopheles Rhabdovirus]	80.28	Hohhot	Diptera	Culicidae	Aedes	Aedes sp.	G1	whole body	812.706
Hohhot_Diptera_rhabdovirus_4-Hohhot_Aedes.spp._rhabdo_4	Hohhot_Diptera_rhabdovirus_4	Hohhot_Aedes.spp._rhabdo_4	Mononegavirales; Rhabdoviridae	14326	Known	complete	Yes	Unknown	QRD99857	MW520364.1 MAG: glycoprotein, partial [Evros rhabdovirus 1]	80.57	Hohhot	Diptera	Culicidae	Aedes	Aedes sp.	G1	whole body	80.4282
Hohhot_Diptera_rhabdovirus_5-Hohhot_Aedes.spp._rhabdo_5	Hohhot_Diptera_rhabdovirus_5	Hohhot_Aedes.spp._rhabdo_5	Mononegavirales; Rhabdoviridae	1404	Known	partial	Yes	Unknown	WPK42857	OR367398.1 MAG: RNA-dependent RNA polymerase, partial [Ramu Anopheles Rhabdovirus]	83.87	Hohhot	Diptera	Culicidae	Aedes	Aedes sp.	G1	whole body	81.644
Ordos_Diptera_rhabdovirus_1-Ordos_Aedes.spp._rhabdo_1	Ordos_Diptera_rhabdovirus_1	Ordos_Aedes.spp._rhabdo_1	Mononegavirales; Rhabdoviridae	7641	Known	partial	Yes	Unknown	WOE89356	OR479701.1 L [Cambodia Anopheles rhabdovirus]	52.66	Ordos	Diptera	Culicidae	Aedes	Aedes sp.	G2	whole body	326.89
Ordos_Diptera_merhavirus_1-Ordos_Aedes.spp._merha_1	Ordos_Diptera_merhavirus_1	Ordos_Aedes.spp._merha_1	Mononegavirales; Rhabdoviridae	5975	Known	partial	Yes	Unknown	WYC12621	PP510874.1 glycoprotein [Formosus virus]	51.02	Ordos	Diptera	Culicidae	Aedes	Aedes sp.	G2	whole body	85.0269
Ordos_Diptera_rhabdovirus_2-Ordos_Aedes.spp._rhabdo_2	Ordos_Diptera_rhabdovirus_2	Ordos_Aedes.spp._rhabdo_2	Mononegavirales; Rhabdoviridae	5168	Known	partial	Yes	Unknown	QSL99567	MW520377.1 MAG: nucleocapsid [Xanthi rhabdovirus]	57.73	Ordos	Diptera	Culicidae	Aedes	Aedes sp.	G2	whole body	326.89
Ordos_Aedes_rhabdovirus_3	Ordos_Diptera_rhabdovirus_3	Ordos_Aedes.spp._rhabdo_3	Mononegavirales; Rhabdoviridae	12905	Novel	complete	Yes	Unknown	QSL99567	OR479701.1 L [Cambodia Anopheles rhabdovirus]	52.29	Ordos	Diptera	Culicidae	Aedes	Aedes sp.	G2	whole body	84
Hohhot_Ixodida_alpharicinrhavirus_1-Hohhot_Dermacentor.silvarum_alpharicinrha_1	Hohhot_Ixodida_alpharicinrhavirus_1	Hohhot_Dermacentor.silvarum_alpharicinrha_1	Mononegavirales; Rhabdoviridae	1085	Known	partial	No	Unknown	XHY99765	PQ180787.1 MAG: nucleocapsid protein, partial [Zhangjiakou Rhabd tick virus 1]	67.72	Hohhot	Ixodida	Ixodidae	Dermacentor	Dermacentor silvarum	G1	midgut	22
Baotou_Ixodida_rhabdovirus_1-BT_Dermacentor.silvarum_rhabdo_1	Baotou_Ixodida_rhabdovirus_1	BT_Dermacentor.silvarum_rhabdo_1	Mononegavirales; Rhabdoviridae	3260	Known	partial	No	Unknown	WAK77186	ON812563.1 MAG: RNA-dependent RNA polymerase [Rhabdoviridae sp.]	85.68	Baotou	Ixodida	Ixodidae	Dermacentor	Dermacentor silvarum	G4	midgut	13
Ordos_Rodentia_curiovirus_1-Ordos_Mus.musculus_curio_1	Ordos_Rodentia_curiovirus_1	Ordos_Mus.musculus_curio_1	Mononegavirales; Rhabdoviridae	496	Known	partial	Yes	Unknown	ABY55231	EU310872.1 nucleocapsid, partial [Curionopolis virus]	77.78	Ordos	Rodentia	Muridae	Mus	Mus musculus	G2	lung	88
Hohhot_Diptera_madalivirus_1-Hohhot_Aedes.spp._madali_1	Hohhot_Diptera_madalivirus_1	Hohhot_Aedes.spp._madali_1	Mononegavirales; Xinmoviridae	5381	Known	partial	Yes	Unknown	YP_010799403	NC_076649.1 RdRP [Anopheles marajoara virus]	54.71	Hohhot	Diptera	Culicidae	Aedes	Aedes sp.	G1	whole body	2112.94
Hohhot_Diptera_doupovirus_1-Hohhot_Aedes.spp._doupo_1	Hohhot_Diptera_doupovirus_1	Hohhot_Aedes.spp._doupo_1	Mononegavirales; Xinmoviridae	1520	Known	partial	No	Unknown	UUG74158	OL700051.1 MAG: hypothetical protein [Aedes mononega-like virus 2]	98.81	Hohhot	Diptera	Culicidae	Aedes	Aedes sp.	G1	whole body	21.7968
Hohhot_Diptera_anphevirus_1-Hohhot_Aedes.spp._anphe_1	Hohhot_Diptera_anphevirus_1	Hohhot_Aedes.spp._anphe_1	Mononegavirales; Xinmoviridae	883	Known	partial	Yes	Unknown	QEM39199	MN053740.1 glycoprotein [Aedes aegypti anphevirus]	40	Hohhot	Diptera	Culicidae	Aedes	Aedes sp.	G1	whole body	25606.9
Ordos_Diptera_culivirus_1-Ordos_Aedes.spp._culi_1	Ordos_Diptera_culivirus_1	Ordos_Aedes.spp._culi_1	Mononegavirales; Xinmoviridae	13314	Known	partial	Yes	Unknown	XNZ98269	PQ753144.1 RNA-dependent RNA polymerase [Serbia mononega-like virus 1]	97.17	Ordos	Diptera	Culicidae	Aedes	Aedes sp.	G2	whole body	746.526
Ordos_Aedes_madalivirus_1	Ordos_Diptera_madalivirus_1	Ordos_Aedes.spp._madali_1	Mononegavirales; Xinmoviridae	12465	Novel	complete	Yes	Unknown	YP_010799403	NC_076649.1 RdRP [Anopheles marajoara virus]	55.36	Ordos	Diptera	Culicidae	Aedes	Aedes sp.	G2	whole body	41.2294
Hohhot_Primates_nasenivirus_1-Hohhot_Homo.sp._naseni_1	Hohhot_Primates_nasenivirus_1	Hohhot_Homo.sp._naseni_1	Nidovirales; Mesoniviridae	691	Known	partial	Yes	Unknown	YP_010800376	NC_076855.1 hypothetical protein QKS33_gp3 [Insect mesonivirus 1]	79.45	Hohhot	Primates	Hominidae	Homo	Homo sp.	G5	blood	68
Hohhot_Diptera_errantivirus_1-Hohhot_Aedes.spp._erranti_1	Hohhot_Diptera_errantivirus_1	Hohhot_Aedes.spp._erranti_1	Ortervirales; Metaviridae	682	Known	partial	Yes	Unknown	WNO13945	OQ968293.1 MAG: polyprotein [Pitica errantivirus]	74.85	Hohhot	Diptera	Culicidae	Aedes	Aedes sp.	G1	whole body	4.13937
Hohhot_Diptera_errantivirus_2-Hohhot_Aedes.spp._erranti_2	Hohhot_Diptera_errantivirus_2	Hohhot_Aedes.spp._erranti_2	Ortervirales; Metaviridae	4096	Known	partial	Yes	Unknown	WHM52789	OQ779233.1 MAG: polyprotein [Inhamum errantivirus]	59.64	Hohhot	Diptera	Culicidae	Aedes	Aedes sp.	G1	whole body	556.586
Ordos_Diptera_errantivirus_1-Ordos_Aedes.spp._erranti_1	Ordos_Diptera_errantivirus_1	Ordos_Aedes.spp._erranti_1	Ortervirales; Metaviridae	422	Known	partial	Yes	Unknown	WNO13941	OQ968291.1 MAG: polyprotein [Panta errantivirus]	75.71	Ordos	Diptera	Culicidae	Aedes	Aedes sp.	G2	whole body	152.747
Ordos_Diptera_errantivirus_2-Ordos_Aedes.spp._erranti_2	Ordos_Diptera_errantivirus_2	Ordos_Aedes.spp._erranti_2	Ortervirales; Metaviridae	1494	Known	partial	Yes	Unknown	WNO13945	OQ968293.1 MAG: polyprotein [Pitica errantivirus]	66.34	Ordos	Diptera	Culicidae	Aedes	Aedes sp.	G2	whole body	223.859
Ordos_Diptera_errantivirus_3-Ordos_Aedes.spp._erranti_3	Ordos_Diptera_errantivirus_3	Ordos_Aedes.spp._erranti_3	Ortervirales; Metaviridae	5707	Known	partial	Yes	Unknown	WNO13902	OQ968272.1 MAG: polyprotein [Breu errantivirus]	67.54	Ordos	Diptera	Culicidae	Aedes	Aedes sp.	G2	whole body	56.5683
Baotou_Diptera_errantivirus_1-BT_Aedes.spp._erranti_1	Baotou_Diptera_errantivirus_1	BT_Aedes.spp._erranti_1	Ortervirales; Metaviridae	7331	Known	partial	Yes	Unknown	WNO13902	OQ968272.1 MAG: polyprotein [Breu errantivirus]	67.54	Baotou	Diptera	Culicidae	Aedes	Aedes sp.	G3	whole body	69.0278
Baotou_Diptera_errantivirus_2-BT_Aedes.spp._erranti_2	Baotou_Diptera_errantivirus_2	BT_Aedes.spp._erranti_2	Ortervirales; Metaviridae	3615	Known	partial	Yes	Unknown	WHM52789	OQ779233.1 MAG: polyprotein [Inhamum errantivirus]	78.42	Baotou	Diptera	Culicidae	Aedes	Aedes sp.	G3	whole body	7.68994
Xilingol_Diptera_errantivirus_1-Xilingol_Aedes.spp._erranti_1	Xilingol_Diptera_errantivirus_1	Xilingol_Aedes.spp._erranti_1	Ortervirales; Metaviridae	7678	Known	partial	Yes	Unknown	WHM52789	OQ779233.1 MAG: polyprotein [Inhamum errantivirus]	74.06	Xilingol	Diptera	Culicidae	Aedes	Aedes sp.	G4	whole body	23.0492
Hohhot_Diptera_birnavirus_1-Hohhot_Aedes.spp._birna_1	Hohhot_Diptera_birnavirus_1	Hohhot_Aedes.spp._birna_1	Orthornavirae; Birnaviridae	1582	Known	partial	No	Unknown	AWJ96719	MH310084.1 polyprotein, partial [Aedes Y virus]	96.43	Hohhot	Diptera	Culicidae	Aedes	Aedes sp.	G1	whole body	84796.4
Hohhot_Otidiformes_dependoparvovirus_1-Hohhot_Otis.tarda_dependoparvo_1	Hohhot_Otidiformes_dependoparvovirus_1	Hohhot_Otis.tarda_dependoparvo_1	Piccovirales; Parvoviridae	882	Known	partial	Yes	Unknown	XOF78091	PQ807633.1 non-structural polyprotein [Goose parvovirus]	54.76	Hohhot	Otidiformes	Otididae	Otis	Otis tarda	G2	lung	78
Ordos_Diptera_picornavius_1-Ordos_Aedes.spp._picornavius_1	Ordos_Diptera_picornavius_1	Ordos_Aedes.spp._picornavius_1	Picornavirales	1336	Known	partial	Yes	Unknown	YP_009552076	NC_040584.1 hypothetical protein 4 [Yongsan picorna-like virus 3]	99.78	Ordos	Diptera	Culicidae	Aedes	Aedes sp.	G2	whole body	13.1337
Hohhot_Diptera_cripavirus_1-Hohhot_Aedes.spp._cripa_1	Hohhot_Diptera_cripavirus_1	Hohhot_Aedes.spp._cripa_1	Picornavirales; Dicistroviridae	9995	Known	partial	Yes	Unknown	NP_046155	NC_001874.1 nonstructural polyprotein [Rhopalosiphum padi virus]	99.33	Hohhot	Diptera	Culicidae	Aedes	Aedes sp.	G1	whole body	45.0554
Hohhot_Diptera_iflavirus_1-Hohhot_Aedes.spp._ifla_1	Hohhot_Diptera_iflavirus_1	Hohhot_Aedes.spp._ifla_1	Picornavirales; Iflaviridae	4456	Known	partial	Yes	Unknown	QBL75900	MH727528.1 polyprotein [Solenopsis invicta virus 11]	40.61	Hohhot	Diptera	Culicidae	Aedes	Aedes sp.	G1	whole body	5.45644
Ordos_mouse_iflavirus_1	Ordos_Rodentia_iflavirus_1	Ordos_Mus.musculus_ifla_1	Picornavirales; Iflaviridae	9846	Novel	complete	Yes	Unknown	DBA62690	BK068533.1 TPA_asm: polyprotein [Iflavirus sp.]	87.14	Ordos	Rodentia	Muridae	Mus	Mus musculus	G2	lung	35
Hohhot_Passeriformes_picornavirus_1-Hohhot_Passer.montanus._picorna_1	Hohhot_Passeriformes_picornavirus_1	Hohhot_Passer.montanus._picorna_1	Picornavirales; Picornaviridae	8040	Known	partial	Yes	Unknown	QKE55023	MT138338.1 MAG: polyprotein [Picornaviridae sp.]	99.21	Hohhot	Passeriformes	Passeridae	Passer	Passer montanus(Eurasian tree sparrow)	G1	lung	177.982
Xilingol_Columbiformes_megrivirus_1-Xilingol_Columba.livia_megri_1	Xilingol_Columbiformes_megrivirus_1	Xilingol_Columba.livia_megri_1	Picornavirales; Picornaviridae	908	Known	partial	No	Unknown	YP_009508290	NC_038957.1 polyprotein [megrivirus B1]	100	Xilingol	Columbiformes	Columbidae	Columba	Columba livia	G4	lung	28
Xilingol_Artiodactyla_hepatovirus_1-Xilingol_Ovis.aries_hepato_1	Xilingol_Artiodactyla_hepatovirus_1	Xilingol_Ovis.aries_hepato_1	Picornavirales; Picornaviridae	2753	Known	partial	Yes	Unknown	FAA04025	BR001716.1 TPA: polyprotein [Goat hepatovirus]	98.69	Xilingol	Artiodactyla	Bovidae	Ovis	Ovis aries	G4	lung	18
Hohhot_Diptera_solinvivirus_1-Hohhot_Aedes.spp._solinvi_1	Hohhot_Diptera_solinvivirus_1	Hohhot_Aedes.spp._solinvi_1	Picornavirales; Solinviviridae	3460	Known	partial	Yes	Unknown	UHM27685	MZ210037.1 MAG: polyprotein [Fushun Solinvi-like virus 1]	99.13	Hohhot	Diptera	Culicidae	Aedes	Aedes sp.	G1	whole body	5.48539
Hohhot_Diptera_chloriridovirus_1-Hohhot_Aedes.spp._chlorirido_1	Hohhot_Diptera_chloriridovirus_1	Hohhot_Aedes.spp._chlorirido_1	Pimascovirales; Iridoviridae	1450	Known	partial	Yes	Unknown	YP_009010295	NC_023611.1 delta DNA polymerase (B family) [Invertebrate iridescent virus 30]	52.7	Hohhot	Diptera	Culicidae	Aedes	Aedes sp.	G1	whole body	812.85
Ordos_Diptera_ribovirus_1-Ordos_Aedes.spp._ribo_1	Ordos_Diptera_ribovirus_1	Ordos_Aedes.spp._ribo_1	Pimascovirales; Iridoviridae	1805	Known	partial	Yes	Unknown	UV42342	OP019926.1 MAG: putative RNA dependent RNA polymerase [Hameenlinna partiti-like virus]	67.03	Ordos	Diptera	Culicidae	Aedes	Aedes sp.	G2	whole body	922.093
Baotou_Ixodida_bunyavirus_2-BT_Dermacentor.silvarum_bunya_2	Baotou_Ixodida_bunyavirus_2	BT_Dermacentor.silvarum_bunya_2	Reovirales	4235	Known	partial	No	Unknown	UXL90844	OP312992.1 MAG: VP2 [Qinghe tick reovirus]	99.58	Baotou	Ixodida	Ixodidae	Dermacentor	Dermacentor silvarum	G4	midgut	51865.4
Baotou_Ixodida_bunyavirus_3-BT_Dermacentor.silvarum_bunya_3	Baotou_Ixodida_bunyavirus_3	BT_Dermacentor.silvarum_bunya_3	Reovirales	4308	Known	partial	No	Unknown	UXL90843	OP312991.1 MAG: RNA-dependent RNA polymerase [Qinghe tick reovirus]	98.79	Baotou	Ixodida	Ixodidae	Dermacentor	Dermacentor silvarum	G4	midgut	40.2979
Ordos_Diptera_bunyavirus_3-Ordos_Aedes.spp._bunya_3	Ordos_Diptera_bunyavirus_3	Ordos_Aedes.spp._bunya_3	Reovirales:Unclassified	4202	Known	partial	Yes	Unknown	WPV63688	OQ716278.1 MAG: RNA-dependent RNA polymerase, partial [Wufeng shrew reo-like virus 2]	47.33	Ordos	Diptera	Culicidae	Aedes	Aedes sp.	G2	whole body	193.069
Xilingol_Columbiformes_aviadenovirus_1-Xilingol_Columba.livia_aviadeno_1	Xilingol_Columbiformes_aviadenovirus_1	Xilingol_Columba.livia_aviadeno_1	Reovirales; Sedoreoviridae	1016	Known	partial	No	Unknown	YP_009310439	NC_031503.1 DNA-binding protein [Pigeon adenovirus 2]	100	Xilingol	Columbiformes	Columbidae	Columba	Columba livia	G4	lung	60
Ordos_Diptera_seadornavirus_1-Ordos_Aedes.spp._seadorna_1	Ordos_Diptera_seadornavirus_1	Ordos_Aedes.spp._seadorna_1	Reovirales; Sedoreoviridae	1467	Known	partial	No	Unknown	AVP72173	MG725867.1 VP8, partial [Liao ning virus]	83.87	Ordos	Diptera	Culicidae	Aedes	Aedes sp.	G2	whole body	251.926
Hohhot_Passeriformes_orthoreovirus_1-Hohhot_Passer.montanus._orthoreo_1	Hohhot_Passeriformes_orthoreovirus_1	Hohhot_Passer.montanus._orthoreo_1	Reovirales; Spinareoviridae	829	Known	partial	Yes	Unknown	AED99913	HM222975.1 muC [Avian orthoreovirus]	89.45	Hohhot	Passeriformes	Passeridae	Passer	Passer montanus(Eurasian tree sparrow)	G1	lung	1.36605
Hohhot_Diptera_dinovernavirus_1-Hohhot_Aedes.spp._dinoverna_1	Hohhot_Diptera_dinovernavirus_1	Hohhot_Aedes.spp._dinoverna_1	Reovirales; Spinareoviridae	786	Known	partial	Yes	Unknown	YP_443936	NC_007667.1 VP2 [Dinovernavirus aedis]	45.1	Hohhot	Diptera	Culicidae	Aedes	Aedes sp.	G1	whole body	3.27097
Hohhot_Diptera_dinovernavirus_2-Hohhot_Aedes.spp._dinoverna_2	Hohhot_Diptera_dinovernavirus_2	Hohhot_Aedes.spp._dinoverna_2	Reovirales; Spinareoviridae	1105	Known	partial	Yes	Unknown	YP_009104385	NC_025492.1 structural protein [Fako virus]	31.06	Hohhot	Diptera	Culicidae	Aedes	Aedes sp.	G1	whole body	6.93272
Hohhot_Diptera_seadornavirus_1-Hohhot_Aedes.spp._seadorna_1	Hohhot_Diptera_seadornavirus_1	Hohhot_Aedes.spp._seadorna_1	Reovirales; Spinareoviridae	3113	Known	partial	Yes	Unknown	AVP49978	MG725052.1 VP8, partial [Liao ning virus]	78.57	Hohhot	Diptera	Culicidae	Aedes	Aedes sp.	G1	whole body	14.5746
Baotou_Diptera_ribovirus_1-BT_Aedes.spp._ribo_1	Baotou_Diptera_ribovirus_1	BT_Aedes.spp._ribo_1	Riboviria; Unclassified	3376	Known	partial	Yes	Unknown	UYE93847	ON860479.1 MAG: RNA-dependent RNA polymerase, partial [Kvarnon virus]	77.99	Baotou	Diptera	Culicidae	Aedes	Aedes sp.	G3	whole body	13.4423
Xilingol_Diptera_ribovirus_1-Xilingol_Aedes.spp._ribo_1	Xilingol_Diptera_ribovirus_1	Xilingol_Aedes.spp._ribo_1	Riboviria; Unclassified	7083	Known	partial	Yes	Unknown	QPF16710	MT913596.1 putative RNA-dependent RNA polymerase [Aedes aegypti To virus 2]	46.33	Xilingol	Diptera	Culicidae	Aedes	Aedes sp.	G4	whole body	60.9997
Hohhot_Passeriformes_ribovirus_1-Hohhot_Passer.montanus._ribo_1	Hohhot_Passeriformes_ribovirus_1	Hohhot_Passer.montanus._ribo_1	Riboviria; Unclassified	951	Known	partial	Yes	Unknown	AYP67570	MK026593.1 RNA-dependent RNA polymerase [Wangarabell virus]	39.87	Hohhot	Passeriformes	Passeridae	Passer	Passer montanus(Eurasian tree sparrow)	G1	lung	9
Hohhot_Passeriformes_ribovirus_2-Hohhot_Passer.montanus._ribo_2	Hohhot_Passeriformes_ribovirus_2	Hohhot_Passer.montanus._ribo_2	Riboviria; Unclassified	1778	Known	partial	Yes	Unknown	WWV90683	OR871374.1 MAG: hypothetical protein [Riboviria sp.]	44.3	Hohhot	Passeriformes	Passeridae	Passer	Passer montanus(Eurasian tree sparrow)	G1	lung	3.06603
Hohhot_Passeriformes_ribovirus_3-Hohhot_Passer.montanus._ribo_3	Hohhot_Passeriformes_ribovirus_3	Hohhot_Passer.montanus._ribo_3	Riboviria; Unclassified	2827	Known	partial	Yes	Unknown	WZL61394	PP415844.1 MAG: hypothetical protein [Kasler Point virus]	35.55	Hohhot	Passeriformes	Passeridae	Passer	Passer montanus(Eurasian tree sparrow)	G2	lung	39.1743
Baotou_Passeriformes_ribovirus_1-BT_Passer.montanus._ribo_1	Baotou_Passeriformes_ribovirus_1	BT_Passer.montanus._ribo_1	Riboviria; Unclassified	3060	Known	partial	Yes	Unknown	WZL61394	PP415844.1 MAG: hypothetical protein [Kasler Point virus]	33.89	Baotou	Passeriformes	Passeridae	Passer	Passer montanus(Eurasian tree sparrow)	G4	lung	9.48328
Baotou_Passeriformes_ribovirus_2-BT_Passer.montanus._ribo_2	Baotou_Passeriformes_ribovirus_2	BT_Passer.montanus._ribo_2	Riboviria; Unclassified	865	Known	partial	Yes	Unknown	WZL61396	PP415846.1 MAG: RNA-dependent RNA polymerase, partial [Wildcat Canyon virus]	47.46	Baotou	Passeriformes	Passeridae	Passer	Passer montanus(Eurasian tree sparrow)	G4	lung	20
Ordos_Diptera_ribovirus_2-Ordos_Aedes.spp._ribo_2	Ordos_Diptera_ribovirus_2	Ordos_Aedes.spp._ribo_2	Riboviria; Unclassified	3090	Known	partial	Yes	Unknown	APG79054	KX884577.1 Minor core capsid 2 [Hubei reo-like virus 11]	22.04	Ordos	Diptera	Culicidae	Aedes	Aedes sp.	G2	whole body	1757.34
Ordos_Diptera_ribovirus_3-Ordos_Aedes.spp._ribo_3	Ordos_Diptera_ribovirus_3	Ordos_Aedes.spp._ribo_3	Riboviria; Unclassified	13917	Known	partial	Yes	Unknown	UYE93836	ON860459.1 MAG: RNA-dependent RNA polymerase, partial [Malby virus]	66.18	Ordos	Diptera	Culicidae	Aedes	Aedes sp.	G2	whole body	326.89
Baotou_Diptera_ribovirus_2-BT_Aedes.spp._ribo_2	Baotou_Diptera_ribovirus_2	BT_Aedes.spp._ribo_2	Riboviria; Unclassified	7597	Known	partial	Yes	Unknown	QPF16710	MT913596.1 putative RNA-dependent RNA polymerase [Aedes aegypti To virus 2]	55.87	Baotou	Diptera	Culicidae	Aedes	Aedes sp.	G3	whole body	43.1878
Baotou_Diptera_ribovirus_3-BT_Aedes.spp._ribo_3	Baotou_Diptera_ribovirus_3	BT_Aedes.spp._ribo_3	Riboviria; Unclassified	7176	Known	partial	Yes	Unknown	QPF16710	MT913596.1 putative RNA-dependent RNA polymerase [Aedes aegypti To virus 2]	64.6	Baotou	Diptera	Culicidae	Aedes	Aedes sp.	G3	whole body	34.7107
Xilingol_Diptera_ribovirus_2-Xilingol_Aedes.spp._ribo_2	Xilingol_Diptera_ribovirus_2	Xilingol_Aedes.spp._ribo_2	Riboviria; Unclassified	8463	Known	partial	Yes	Unknown	UYE93847	ON860479.1 MAG: RNA-dependent RNA polymerase, partial [Kvarnon virus]	79.12	Xilingol	Diptera	Culicidae	Aedes	Aedes sp.	G4	whole body	79.6569
Baotou_Ixodida_ribovirus_1-BT_Dermacentor.silvarum_ribo_1	Baotou_Ixodida_ribovirus_1	BT_Dermacentor.silvarum_ribo_1	Riboviria; Unclassified	2686	Known	partial	No	Unknown	QBQ65102	MH688544.1 ORF1 [Xinjiang tick associated virus 1]	99.22	Baotou	Ixodida	Ixodidae	Dermacentor	Dermacentor silvarum	G4	midgut	134
Ordos_Rodentia_ribovirus_1-Ordos_Mus.musculus_ribo_1	Ordos_Rodentia_ribovirus_1	Ordos_Mus.musculus_ribo_1	Riboviria; Unclassified	1394	Known	partial	Yes	Unknown	WWV90559	OR871233.1 MAG: RNA polymerase, partial [Riboviria sp.]	56.25	Ordos	Rodentia	Muridae	Mus	Mus musculus	G2	lung	3
Ordos_Columbiformes_aviadenovirus_1-Ordos_Columba.livia_aviadeno_1	Ordos_Columbiformes_aviadenovirus_1	Ordos_Columba.livia_aviadeno_1	Rowavirales; Adenoviridae	1016	Known	partial	No	Unknown	YP_009310439	NC_031503.1 DNA-binding protein [Pigeon adenovirus 2]	100	Ordos	Columbiformes	Columbidae	Columba	Columba livia	G2	lung	3.07151
Ordos_Columbiformes_torquetenovirus_1-Ordos_Columba.livia_torqueteno_1	Ordos_Columbiformes_torquetenovirus_1	Ordos_Columba.livia_torqueteno_1	Sanitavirales; Anelloviridae	2867	Known	partial	No	Unknown	QUS52976	MW286327.1 ORF2 capsid protein [Pigeon torque teno virus]	100	Ordos	Columbiformes	Columbidae	Columba	Columba livia	G2	lung	905.732
Ordos_Columbiformes_torquetenovirus_2-Ordos_Columba.livia_torqueteno_2	Ordos_Columbiformes_torquetenovirus_2	Ordos_Columba.livia_torqueteno_2	Sanitavirales; Anelloviridae	7749	Known	partial	No	Unknown	XLM37003	PQ583810.1 replication protein [Pigeon torque teno virus]	92.76	Ordos	Columbiformes	Columbidae	Columba	Columba livia	G2	lung	111100
Xilingol_Columbiformes_torquetenovirus_1-Xilingol_Columba.livia_torqueteno_1	Xilingol_Columbiformes_torquetenovirus_1	Xilingol_Columba.livia_torqueteno_1	Sanitavirales; Anelloviridae	1899	Known	partial	No	Unknown	QUS52976	MW286327.1 ORF2 capsid protein [Pigeon torque teno virus]	98.03	Xilingol	Columbiformes	Columbidae	Columba	Columba livia	G4	lung	16.8399
Xilingol_Artiodactyla_iotatorquevirus_1-Xilingol_Susscrofa_iotatorque_1	Xilingol_Artiodactyla_iotatorquevirus_1	Xilingol_Susscrofa_iotatorque_1	Sanitavirales; Anelloviridae	659	Known	partial	No	Unknown	QIC35199	MN272115.1 ORF1, partial [Torque teno sus virus]	94.98	Xilingol	Artiodactyla	Suida	Sus	Susscrofa	G2	lung	56
Hohhot_Diptera_sobemovirus_1-Hohhot_Aedes.spp._sobemo_1	Hohhot_Diptera_sobemovirus_1	Hohhot_Aedes.spp._sobemo_1	Sobelivirales; Solemoviridae	617	Known	partial	Yes	Unknown	UYL94352	ON955124.1 MAG: hypothetical protein [Hanko sobemovirus]	93.02	Hohhot	Diptera	Culicidae	Aedes	Aedes sp.	G1	whole body	11.8247
Hohhot_Diptera_sobemovirus_2-Hohhot_Aedes.spp._sobemo_2	Hohhot_Diptera_sobemovirus_2	Hohhot_Aedes.spp._sobemo_2	Sobelivirales; Solemoviridae	489	Known	partial	Yes	Unknown	QHA33876	MN661095.1 RdRp [Atrato Sobemo-like virus 4]	72.79	Hohhot	Diptera	Culicidae	Aedes	Aedes sp.	G1	whole body	9.2195
Hohhot_Diptera_sobemovirus_3-Hohhot_Aedes.spp._sobemo_3	Hohhot_Diptera_sobemovirus_3	Hohhot_Aedes.spp._sobemo_3	Sobelivirales; Solemoviridae	3884	Known	partial	No	Unknown	UGO57097	MT568532.1 MAG: hypothetical protein, partial [Pyongtaek Aedes Solemovirus]	99.35	Hohhot	Diptera	Culicidae	Aedes	Aedes sp.	G1	whole body	4421.28
Hohhot_Diptera_sobemovirus_4-Hohhot_Aedes.spp._sobemo_4	Hohhot_Diptera_sobemovirus_4	Hohhot_Aedes.spp._sobemo_4	Sobelivirales; Solemoviridae	1502	Known	partial	Yes	Unknown	XGZ29681	PP764661.1 MAG: capsid protein [Bafoussam mosquito solemovirus]	76.06	Hohhot	Diptera	Culicidae	Aedes	Aedes sp.	G1	whole body	567.339
Ordos_Diptera_sobemovirus_1-Ordos_Aedes.spp._sobemo_1	Ordos_Diptera_sobemovirus_1	Ordos_Aedes.spp._sobemo_1	Sobelivirales; Solemoviridae	2787	Known	partial	Yes	Unknown	UYL94353	ON955124.1 MAG: putative RNA-dependent RNA polymerase [Hanko sobemovirus]	99.01	Ordos	Diptera	Culicidae	Aedes	Aedes sp.	G2	whole body	527.72
Ordos_Diptera_sobemovirus_2-Ordos_Aedes.spp._sobemo_2	Ordos_Diptera_sobemovirus_2	Ordos_Aedes.spp._sobemo_2	Sobelivirales; Solemoviridae	1729	Known	partial	Yes	Unknown	QSL99569	MW520383.1 MAG: putative capsid protein [Pythion sobemo-like virus]	88.73	Ordos	Diptera	Culicidae	Aedes	Aedes sp.	G2	whole body	13.4966
Xilingol_Galliformes_sobemovirus_1-Xilingol_Gallus.gallus_sobemo_1	Xilingol_Galliformes_sobemovirus_1	Xilingol_Gallus.gallus_sobemo_1	Sobelivirales; Solemoviridae	416	Known	partial	Yes	Unknown	WPM94926	OP751396.1 RNA-dependent RNA polymerase [Rice yellow mottle virus]	94.93	Xilingol	Galliformes	Phasianidae	Gallus	Gallus gallus	G2	lung	21
Hohhot_sparrow_avastrovirus_1	Hohhot_Passeriformes_avastrovirus_1	Hohhot_Passer.montanus._avastro_1	Stellavirales; Astroviridae	7020	Novel	complete	Yes	Unknown	QKN88798	MT137991.1 MAG: nonstructural polyprotein [Astroviridae sp.]	87.37	Hohhot	Passeriformes	Passeridae	Passer	Passer montanus(Eurasian tree sparrow)	G1	lung	47.903
Hohhot_Passeriformes_avastrovirus_2-Hohhot_Passer.montanus._avastro_2	Hohhot_Passeriformes_avastrovirus_2	Hohhot_Passer.montanus._avastro_2	Stellavirales; Astroviridae	718	Known	partial	Yes	Yes	WOK58275	OQ802697.1 MAG: RNA-dependent RNA polymerase [Jingmen bat astrovirus 1]	45.57	Hohhot	Passeriformes	Passeridae	Passer	Passer montanus(Eurasian tree sparrow)	G1	lung	6
Xilingol_Columbiformes_avastrovirus_1-Xilingol_Columba.livia_avastro_1	Xilingol_Columbiformes_avastrovirus_1	Xilingol_Columba.livia_avastro_1	Stellavirales; Astroviridae	4604	Known	complete	Yes	Yes	APA19814	KT946725.1 ORF1a [Avian astrovirus]	89.13	Xilingol	Columbiformes	Columbidae	Columba	Columba livia	G4	lung	69.8474
Baotou_Ixodida_mamastrovirus_1-BT_Dermacentor.silvarum_mamastro_1	Baotou_Ixodida_mamastrovirus_1	BT_Dermacentor.silvarum_mamastro_1	Stellavirales; Astroviridae	6571	Known	partial	Yes	Yes	CUI02222	LN879482.1 nonstructural protein, putative serine protase [Bovine astrovirus]	98	Baotou	Ixodida	Ixodidae	Dermacentor	Dermacentor silvarum	G4	midgut	133
Hohhot_Passeriformes_tombusvirus_1-Hohhot_Passer.montanus._tombus_1	Hohhot_Passeriformes_tombusvirus_1	Hohhot_Passer.montanus._tombus_1	Tolivirales; Tombusviridae	4533	Known	complete	Yes	Unknown	QKK82930	MN830247.1 RNA-dependent RNA polymerase [Paradise bay virus]	65.83	Hohhot	Passeriformes	Passeridae	Passer	Passer montanus(Eurasian tree sparrow)	G1	lung	1603.6
Hohhot_Passeriformes_tombusvirus_2-Hohhot_Passer.montanus._tombus_2	Hohhot_Passeriformes_tombusvirus_2	Hohhot_Passer.montanus._tombus_2	Tolivirales; Tombusviridae	1630	Known	partial	Yes	Unknown	UHS72304	MZ218517.1 MAG: hypothetical protein 2 [Tombusviridae sp.]	40.27	Hohhot	Passeriformes	Passeridae	Passer	Passer montanus(Eurasian tree sparrow)	G1	lung	59
Baotou_Ixodida_inovirus_1-BT_Dermacentor.silvarum_ino_1	Baotou_Ixodida_inovirus_1	BT_Dermacentor.silvarum_ino_1	Tubulavirales; Inoviridae	1575	Known	partial	Yes	Unknown	AXH76073	MH617306.1 MAG: hypothetical protein [Inoviridae sp.]	82.98	Baotou	Ixodida	Ixodidae	Dermacentor	Dermacentor silvarum	G4	midgut	77
Xilingol_Ixodida_narnavirus_1-Xilingol_Dermacentor.silvarum_narna_1	Xilingol_Ixodida_narnavirus_1	Xilingol_Dermacentor.silvarum_flexi_1	Tymovirales; Deltaflexiviridae	6164	Known	partial	Yes	Unknown	QIR30322	MN539860.1 unnamed protein product [Fusarium deltaflexivirus 2]	81.6	Xilingol	Ixodida	Ixodidae	Dermacentor	Dermacentor silvarum	G5	midgut	45
Ordos_Diptera_narnavirus_1-Ordos_Aedes.spp._narna_1	Ordos_Diptera_narnavirus_1	Ordos_Aedes.spp._narna_1	Wolframvirales; Narnaviridae.	1909	Known	partial	Yes	Unknown	UVX28909	ON791652.1 MAG: RNA dependent RNA polymerase [Ustilaginoidea virens narna-like virus 1]	80.94	Ordos	Diptera	Culicidae	Aedes	Aedes sp.	G2	whole body	284.293
Hohhot_Passeriformes_narnavirus_1-Hohhot_Passer.montanus._narna_1	Hohhot_Passeriformes_narnavirus_1	Hohhot_Passer.montanus._narna_1	Wolframvirales; Narnaviridae	901	Known	partial	Yes	Unknown	QIJ70073	MT129714.1 RNA-dependent RNA polymerase [Swanson narna-like virus]	62.33	Hohhot	Passeriformes	Passeridae	Passer	Passer montanus(Eurasian tree sparrow)	G1	lung	1.09284
Hohhot_sparrow_narnavirus_2	Hohhot_Passeriformes_narnavirus_2	Hohhot_Passer.montanus._narna_2	Wolframvirales; Narnaviridae	3233	Novel	complete	Yes	Unknown	QIJ70073	MT129714.1 RNA-dependent RNA polymerase [Swanson narna-like virus]	61.53	Hohhot	Passeriformes	Passeridae	Passer	Passer montanus(Eurasian tree sparrow)	G2	lung	69125.7
Ordos_Passeriformes_narnavirus_1-Ordos_Passer.montanus._narna_1	Ordos_Passeriformes_narnavirus_1	Ordos_Passer.montanus._narna_1	Wolframvirales; Narnaviridae	868	Known	partial	Yes	Unknown	QIJ70073	MT129714.1 RNA-dependent RNA polymerase [Swanson narna-like virus]	64.83	Ordos	Passeriformes	Passeridae	Passer	Passer montanus(Eurasian tree sparrow)	G3	lung	453.379
Xilingol_Passeriformes_narnavirus_1-Xilingol_Passer.montanus._narna_1	Xilingol_Passeriformes_narnavirus_1	Xilingol_Passer.montanus._narna_1	Wolframvirales; Narnaviridae	2924	Known	partial	Yes	Unknown	QIJ70073	MT129714.1 RNA-dependent RNA polymerase [Swanson narna-like virus]	63.05	Xilingol	Passeriformes	Passeridae	Passer	Passer montanus(Eurasian tree sparrow)	G5	lung	23.4286
Hohhot_Diptera_narnavirus_1-Hohhot_Aedes.spp._narna_1	Hohhot_Diptera_narnavirus_1	Hohhot_Aedes.spp._narna_1	Wolframvirales; Narnaviridae	3173	Known	partial	Yes	Unknown	AGW51766	KF298275.2 putative RNA-dependent RNA polymerase-like protein [Ochlerotatus-associated narna-like virus 1]	94.07	Hohhot	Diptera	Culicidae	Aedes	Aedes sp.	G1	whole body	1037.55
Hohhot_Aedes_narnavirus_2	Hohhot_Diptera_narnavirus_2	Hohhot_Aedes.spp._narna_2	Wolframvirales; Narnaviridae	3355	Novel	complete	Yes	Unknown	QIR30316	MN539854.1 RNA-dependent RNA polymerase [Plasmopara viticola lesion associated narnavirus 37]	62.03	Hohhot	Diptera	Culicidae	Aedes	Aedes sp.	G1	whole body	4.19726
Hohhot_Diptera_orthoflavivirus_3-Hohhot_Aedes.spp._orthoflavi_3	Hohhot_Diptera_orthoflavivirus_3	Hohhot_Aedes.spp._orthoflavi_3	Amarillovirales; Flaviviridae	796	Known	partial	Yes	Unknown	YP_009259265	YP_009164029.1 nonstructural protein NS1 [Parramatta River virus]	49.3	Hohhot	Diptera	Culicidae	Aedes	Aedes sp.	G1	whole body	36
Hohhot_Diptera_flavivirus_2-Hohhot_Aedes.spp._flavi_2	Hohhot_Diptera_flavivirus_2	Hohhot_Aedes.spp._flavi_2	Amarillovirales; Flaviviridae	2353	Known	partial	Yes	Unknown	YP_009388577	NC_035118.1 polyprotein [Karumba virus]	66.1	Hohhot	Diptera	Culicidae	Aedes	Aedes sp.	G1	whole body	97.5936
Ordos_Diptera_errantivirus_4-Ordos_Aedes.spp._erranti_4	Ordos_Diptera_errantivirus_4	Ordos_Aedes.spp._erranti_4	Ortervirales; Metaviridae	1253	Known	partial	Yes	Unknown	WNO13945	OQ968293.1 MAG: polyprotein [Pitica errantivirus]	97.36	Ordos	Diptera	Culicidae	Aedes	Aedes sp.	G2	whole body	3.33576
Ordos_Diptera_narnavirus_2-Ordos_Aedes.spp._narna_2	Ordos_Diptera_narnavirus_2	Ordos_Aedes.spp._narna_2	Wolframvirales; Narnaviridae	1712	Known	partial	Yes	Unknown	UFT26917	MZ852366.1 RNA-dependent RNA polymerase [Drosophila-associated narnavirus 1]	98.4	Ordos	Diptera	Culicidae	Aedes	Aedes sp.	G2	whole body	28.2772
Xilingol_Ixodida_narnavirus_2-Xilingol_Dermacentor.silvarum_narna_2	Xilingol_Ixodida_narnavirus_2	Xilingol_Dermacentor.silvarum_narna_2	Wolframvirales; Narnaviridae	2057	Known	partial	Yes	Unknown	QIR30322	MN539860.1 RNA-dependent RNA polymerase [Plasmopara viticola lesion associated narnavirus 43]	98.53	Xilingol	Ixodida	Ixodidae	Dermacentor	Dermacentor silvarum	G5	midgut	90
Baotou_Ixodida_narnavirus_1-BT_Dermacentor.silvarum_narna_1	Baotou_Ixodida_narnavirus_1	BT_Dermacentor.silvarum_narna_1	Wolframvirales; Narnaviridae	1641	Known	partial	Yes	Unknown	WAK75240	ON811958.1 MAG: RNA-dependent RNA polymerase [Narnaviridae sp.]	64.48	Baotou	Ixodida	Ixodidae	Dermacentor	Dermacentor silvarum	G4	midgut	15
Baotou_Artiodactyla_narnavirus_1-BT_Bos.taurus_narna_1	Baotou_Artiodactyla_narnavirus_1	BT_Bos.taurus_narna_1	Wolframvirales; Narnaviridae	361	Known	partial	Yes	Unknown	UYL95369	ON746422.1 MAG: RNA-dependent RNA polymerase [Kunming tick virus 1]	99.16	Baotou	Artiodactyla	Bovidae	Bos	Bos taurus	G11	lung	21
Xilingol_Artiodactyla_narnavirus_1-Xilingol_Ovis.aries_narna_1	Xilingol_Artiodactyla_narnavirus_1	Xilingol_Ovis.aries_narna_1	Wolframvirales; Narnaviridae	1175	Known	partial	Yes	Unknown	QJT93749	MN605430.1 RNA-dependent RNA polymerase [Erysiphe necator associated narnavirus 17]	45.93	Xilingol	Artiodactyla	Bovidae	Ovis	Ovis aries	G4	lung	25
