# Supplementary material for: Ecological Boundaries Drive Microbial Diversity and Spillover Risk in Mixed Pastoral Systems of Inner Mongolia
Source: Research Square preprint supplement (doi:10.21203/rs.3.rs-7765229/v1), 2025-10-07
Supplement: Supplementary file 2 [file b0044c22646ef097036ac63b.xlsx]

## Sheet: Sheet1
Host_Type	Host health status	Number of pooled samples	Region	Host habitat	Anthelmintics
Human	Diseased	10	Hohhot	pasture	treated
Human	Diseased	10	Hohhot	pasture	treated
Human	Diseased	10	Hohhot	pasture	treated
Human	Diseased	10	Hohhot	pasture	treated
Human	Diseased	10	Hohhot	pasture	treated
Cattle	Diseased	4	Hohhot	pasture	treated
Cattle	Diseased	5	Hohhot	pasture	treated
Cattle	Diseased	4	Hohhot	pasture	treated
Cattle	Healthy	5	Hohhot	pasture	treated
Cattle	Diseased	6	Ordos	pasture	treated
Cattle	Healthy	4	Ordos	pasture	treated
Cattle	Healthy	5	Ordos	pasture	treated
Cattle	Healthy	6	Ordos	pasture	treated
Cattle	Healthy	5	Baotou	pasture	treated
Cattle	Diseased	5	Baotou	pasture	treated
Cattle	Healthy	6	Baotou	pasture	not_treated
Cattle	Diseased	8	Xilingol	pasture	not_treated
Cattle	Healthy	8	Xilingol	pasture	treated
Cattle	Diseased	8	Xilingol	pasture	treated
Sheep	Healthy	15	Hohhot	pasture	treated
Sheep	Diseased	16	Ordos	pasture	treated
Sheep	Diseased	20	Baotou	pasture	treated
Sheep	Diseased	14	Xilingol	pasture	treated
Pig	Healthy	8	Hohhot	pasture	treated
Pig	Diseased	9	Xilingol	pasture	treated
Rabbit	Healthy	17	Hohhot	pasture	not_treated
Rabbit	Healthy	16	Ordos	pasture	not_treated
Rabbit	Healthy	17	Baotou	pasture	treated
Rabbit	Diseased	18	Xilingol	pasture	treated
Chicken	Healthy	64	Hohhot	pasture	not_treated
Chicken	Diseased	68	Xilingol	pasture	treated
Tick	Unknow	27	Hohhot	pasture	not_treated
Tick	Unknow	33	Hohhot	pasture	not_treated
Tick	Unknow	32	Ordos	pasture	not_treated
Tick	Unknow	30	Baotou	pasture	not_treated
Tick	Unknow	29	Xilingol	pasture	not_treated
Mosquito	Unknow	159	Hohhot	pasture	not_treated
Mosquito	Unknow	165	Ordos	pasture	not_treated
Mosquito	Unknow	152	Baotou	pasture	not_treated
Mosquito	Unknow	188	Xilingol	pasture	not_treated
Rock pigeon	Diseased	19	Hohhot	Grassland	not_treated
Rock pigeon	Diseased	15	Ordos	Grassland	not_treated
Rock pigeon	Diseased	15	Baotou	Grassland	not_treated
Rock pigeon	Diseased	16	Xilingol	Grassland	not_treated
Eurasian tree sparrow	Diseased	12	Hohhot	Grassland	not_treated
Eurasian tree sparrow	Diseased	18	Hohhot	Grassland	not_treated
Eurasian tree sparrow	Diseased	28	Ordos	Grassland	not_treated
Eurasian tree sparrow	Diseased	32	Baotou	Grassland	not_treated
Eurasian tree sparrow	Diseased	36	Xilingol	Grassland	not_treated
Egret	Diseased	1	Hohhot	Grassland	not_treated
Egret	Diseased	1	Hohhot	Grassland	not_treated
Egret	Diseased	1	Hohhot	Grassland	not_treated
Great Bustard	Diseased	1	Hohhot	Grassland	not_treated
Great Bustard	Diseased	1	Hohhot	Grassland	not_treated
Eurasian eagle owl	Diseased	1	Hohhot	Grassland	not_treated
Eurasian eagle owl	Diseased	1	Hohhot	Grassland	not_treated
Hen Harrier	Diseased	1	Hohhot	Grassland	not_treated
Hen Harrier	Diseased	1	Hohhot	Grassland	not_treated
Hen Harrier	Diseased	1	Hohhot	Grassland	not_treated
House mouse	Diseased	18	Hohhot	pasture	not_treated
House mouse	Diseased	15	Ordos	Grassland	not_treated
Daurian ground squirrel	Diseased	16	Hohhot	pasture	not_treated
Daurian ground squirrel	Diseased	17	Ordos	Grassland	not_treated
Daurian ground squirrel	Diseased	15	Baotou	Grassland	not_treated
Daurian ground squirrel	Diseased	19	Xilingol	Grassland	not_treated
