# Supplementary material for: Ecological Boundaries Drive Microbial Diversity and Spillover Risk in Mixed Pastoral Systems of Inner Mongolia
Source: Research Square preprint supplement (doi:10.21203/rs.3.rs-7765229/v1), 2025-10-07
Supplement: Supplementary file 3 [file c1e019d4569dc5843dcf1ac4.xlsx]

## Sheet: filed survey
City	Location_id	species	Host habitat	Species_density/km²	Species_richness
Hohhot	1	Daurian ground squirrel	Pasture	8	13
Ordos	1	Daurian ground squirrel	Pasture	9	15
Baotou	1	Daurian ground squirrel	Natural grassland	8	13
Hohhot	2	Daurian ground squirrel	Pasture	10	14
Ordos	2	Daurian ground squirrel	Pasture	9	12
Baotou	2	Daurian ground squirrel	Pasture	10	14
Hohhot	3	Daurian ground squirrel	Natural grassland	7	12
Ordos	3	Daurian ground squirrel	Pasture	9	15
Baotou	3	Daurian ground squirrel	Pasture	9	14
Ordos	4	Daurian ground squirrel	Pasture	9	16
Xilingol	4	Daurian ground squirrel	Pasture	10	14
Hohhot	5	Daurian ground squirrel	Pasture	9	15
Baotou	5	Daurian ground squirrel	Pasture	9	14
Hohhot	1	Daurian ground squirrel	Natural grassland	9	10
Hohhot	2	Daurian ground squirrel	Natural grassland	10	12
Ordos	2	Daurian ground squirrel	Natural grassland	8	11
Hohhot	3	Daurian ground squirrel	Pasture	8	13
Xilingol	3	Daurian ground squirrel	Pasture	9	12
Hohhot	4	Daurian ground squirrel	Pasture	9	13
Baotou	4	Daurian ground squirrel	Pasture	9	14
Xilingol	4	Daurian ground squirrel	Natural grassland	9	10
Hohhot	5	Daurian ground squirrel	Natural grassland	8	11
Ordos	5	Daurian ground squirrel	Pasture	9	11
Xilingol	1	Daurian ground squirrel	Natural grassland	6	9
Xilingol	2	Daurian ground squirrel	Natural grassland	7	12
Xilingol	3	Daurian ground squirrel	Natural grassland	5	12
Hohhot	4	Daurian ground squirrel	Natural grassland	5	9
Ordos	5	Daurian ground squirrel	Natural grassland	7	9
Xilingol	5	Daurian ground squirrel	Natural grassland	5	10
Ordos	1	Daurian ground squirrel	Natural grassland	7	9
Baotou	1	Daurian ground squirrel	Pasture	7	15
Xilingol	1	Daurian ground squirrel	Pasture	6	13
Xilingol	2	Daurian ground squirrel	Pasture	7	11
Ordos	3	Daurian ground squirrel	Natural grassland	6	11
Ordos	4	Daurian ground squirrel	Natural grassland	7	7
Xilingol	5	Daurian ground squirrel	Pasture	6	11
Baotou	2	Daurian ground squirrel	Natural grassland	5	9
Baotou	3	Daurian ground squirrel	Natural grassland	7	12
Baotou	4	Daurian ground squirrel	Natural grassland	7	9
Baotou	5	Daurian ground squirrel	Natural grassland	9	12
Baotou	1	Eurasian tree sparrow	Natural grassland	7	12
Ordos	1	Eurasian tree sparrow	Natural grassland	4	9
Ordos	2	Eurasian tree sparrow	Pasture	27	12
Baotou	2	Eurasian tree sparrow	Pasture	23	14
Baotou	3	Eurasian tree sparrow	Pasture	29	14
Hohhot	4	Eurasian tree sparrow	Pasture	28	13
Ordos	4	Eurasian tree sparrow	Pasture	26	16
Baotou	4	Eurasian tree sparrow	Pasture	30	14
Xilingol	4	Eurasian tree sparrow	Pasture	22	14
Hohhot	5	Eurasian tree sparrow	Pasture	25	15
Ordos	5	Eurasian tree sparrow	Pasture	29	11
Baotou	5	Eurasian tree sparrow	Pasture	29	14
Hohhot	1	Eurasian tree sparrow	Pasture	30	13
Ordos	1	Eurasian tree sparrow	Pasture	25	15
Baotou	1	Eurasian tree sparrow	Pasture	24	15
Hohhot	2	Eurasian tree sparrow	Pasture	21	14
Ordos	2	Eurasian tree sparrow	Natural grassland	12	11
Hohhot	3	Eurasian tree sparrow	Pasture	24	13
Ordos	3	Eurasian tree sparrow	Pasture	23	15
Xilingol	3	Eurasian tree sparrow	Pasture	22	12
Ordos	4	Eurasian tree sparrow	Natural grassland	8	7
Hohhot	1	Eurasian tree sparrow	Natural grassland	7	10
Xilingol	1	Eurasian tree sparrow	Pasture	7	13
Hohhot	2	Eurasian tree sparrow	Natural grassland	8	12
Xilingol	2	Eurasian tree sparrow	Natural grassland	6	12
Hohhot	3	Eurasian tree sparrow	Natural grassland	10	12
Ordos	3	Eurasian tree sparrow	Natural grassland	7	11
Xilingol	3	Eurasian tree sparrow	Natural grassland	9	12
Xilingol	5	Eurasian tree sparrow	Pasture	7	11
Xilingol	1	Eurasian tree sparrow	Natural grassland	7	9
Xilingol	2	Eurasian tree sparrow	Pasture	9	11
Hohhot	4	Eurasian tree sparrow	Natural grassland	8	9
Xilingol	4	Eurasian tree sparrow	Natural grassland	8	10
Hohhot	5	Eurasian tree sparrow	Natural grassland	9	11
Ordos	5	Eurasian tree sparrow	Natural grassland	8	9
Xilingol	5	Eurasian tree sparrow	Natural grassland	6	10
Baotou	2	Eurasian tree sparrow	Natural grassland	9	9
Baotou	3	Eurasian tree sparrow	Natural grassland	7	12
Baotou	4	Eurasian tree sparrow	Natural grassland	6	9
Baotou	5	Eurasian tree sparrow	Natural grassland	8	12
Baotou	1	Syrrhaptes paradoxus	Natural grassland	6	12
Baotou	2	Syrrhaptes paradoxus	Natural grassland	0	9
Baotou	3	Syrrhaptes paradoxus	Natural grassland	9	12
Baotou	4	Syrrhaptes paradoxus	Natural grassland	0	9
Baotou	1	Syrrhaptes paradoxus	Pasture	0	15
Hohhot	1	Syrrhaptes paradoxus	Pasture	0	13
Hohhot	1	Syrrhaptes paradoxus	Natural grassland	0	10
Ordos	1	Syrrhaptes paradoxus	Pasture	0	15
Ordos	1	Syrrhaptes paradoxus	Natural grassland	0	9
Xilingol	1	Syrrhaptes paradoxus	Pasture	0	13
Xilingol	1	Syrrhaptes paradoxus	Natural grassland	0	9
Baotou	2	Syrrhaptes paradoxus	Pasture	0	14
Hohhot	2	Syrrhaptes paradoxus	Pasture	0	14
Hohhot	2	Syrrhaptes paradoxus	Natural grassland	0	12
Ordos	2	Syrrhaptes paradoxus	Pasture	0	12
Ordos	2	Syrrhaptes paradoxus	Natural grassland	0	11
Xilingol	2	Syrrhaptes paradoxus	Pasture	0	11
Xilingol	2	Syrrhaptes paradoxus	Natural grassland	0	12
Baotou	3	Syrrhaptes paradoxus	Pasture	0	14
Hohhot	3	Syrrhaptes paradoxus	Pasture	0	13
Hohhot	3	Syrrhaptes paradoxus	Natural grassland	0	12
Ordos	3	Syrrhaptes paradoxus	Pasture	0	15
Ordos	3	Syrrhaptes paradoxus	Natural grassland	0	11
Xilingol	3	Syrrhaptes paradoxus	Pasture	0	12
Xilingol	3	Syrrhaptes paradoxus	Natural grassland	0	12
Baotou	4	Syrrhaptes paradoxus	Pasture	0	14
Hohhot	4	Syrrhaptes paradoxus	Pasture	0	13
Hohhot	4	Syrrhaptes paradoxus	Natural grassland	0	9
Ordos	4	Syrrhaptes paradoxus	Pasture	0	16
Ordos	4	Syrrhaptes paradoxus	Natural grassland	8	7
Xilingol	4	Syrrhaptes paradoxus	Pasture	0	14
Xilingol	4	Syrrhaptes paradoxus	Natural grassland	0	10
Baotou	5	Syrrhaptes paradoxus	Pasture	0	14
Hohhot	5	Syrrhaptes paradoxus	Pasture	0	15
Hohhot	5	Syrrhaptes paradoxus	Natural grassland	0	11
Ordos	5	Syrrhaptes paradoxus	Pasture	0	11
Ordos	5	Syrrhaptes paradoxus	Natural grassland	0	9
Xilingol	5	Syrrhaptes paradoxus	Pasture	0	11
Xilingol	5	Syrrhaptes paradoxus	Natural grassland	0	10
Baotou	5	Syrrhaptes paradoxus	Natural grassland	0	12
Baotou	1	Great bustard	Natural grassland	1	12
Hohhot	1	Great bustard	Pasture	0	13
Ordos	1	Great bustard	Pasture	1	15
Ordos	2	Great bustard	Pasture	1	12
Baotou	2	Great bustard	Pasture	0	14
Xilingol	2	Great bustard	Pasture	0	11
Ordos	3	Great bustard	Pasture	0	15
Xilingol	4	Great bustard	Natural grassland	0	10
Hohhot	5	Great bustard	Pasture	0	15
Ordos	5	Great bustard	Pasture	0	11
Hohhot	1	Great bustard	Natural grassland	0	10
Ordos	1	Great bustard	Natural grassland	0	9
Xilingol	1	Great bustard	Pasture	0	13
Baotou	3	Great bustard	Pasture	0	14
Hohhot	4	Great bustard	Pasture	0	13
Baotou	4	Great bustard	Pasture	1	14
Xilingol	4	Great bustard	Pasture	0	14
Hohhot	5	Great bustard	Natural grassland	0	11
Ordos	5	Great bustard	Natural grassland	0	9
Baotou	1	Great bustard	Pasture	0	15
Xilingol	1	Great bustard	Natural grassland	0	9
Hohhot	2	Great bustard	Pasture	0	14
Hohhot	3	Great bustard	Pasture	0	13
Xilingol	3	Great bustard	Pasture	0	12
Hohhot	4	Great bustard	Natural grassland	0	9
Ordos	4	Great bustard	Pasture	0	16
Baotou	5	Great bustard	Pasture	1	14
Xilingol	5	Great bustard	Pasture	0	11
Hohhot	2	Great bustard	Natural grassland	0	12
Ordos	2	Great bustard	Natural grassland	1	11
Xilingol	2	Great bustard	Natural grassland	0	12
Hohhot	3	Great bustard	Natural grassland	1	12
Ordos	3	Great bustard	Natural grassland	0	11
Xilingol	3	Great bustard	Natural grassland	0	12
Ordos	4	Great bustard	Natural grassland	0	7
Xilingol	5	Great bustard	Natural grassland	0	10
Baotou	2	Great bustard	Natural grassland	0	9
Baotou	3	Great bustard	Natural grassland	0	12
Baotou	4	Great bustard	Natural grassland	0	9
Baotou	5	Great bustard	Natural grassland	0	12
Baotou	1	House mouse	Natural grassland	7	12
Ordos	1	House mouse	Pasture	10	15
Baotou	1	House mouse	Pasture	13	15
Xilingol	1	House mouse	Pasture	11	13
Ordos	2	House mouse	Natural grassland	1	11
Hohhot	3	House mouse	Pasture	18	13
Baotou	3	House mouse	Pasture	15	14
Xilingol	3	House mouse	Pasture	6	12
Hohhot	4	House mouse	Pasture	11	13
Ordos	4	House mouse	Pasture	17	16
Ordos	5	House mouse	Pasture	19	11
Baotou	5	House mouse	Pasture	12	14
Xilingol	5	House mouse	Pasture	22	11
Hohhot	1	House mouse	Pasture	19	13
Ordos	2	House mouse	Pasture	8	12
Baotou	2	House mouse	Pasture	12	14
Ordos	3	House mouse	Pasture	15	15
Ordos	4	House mouse	Natural grassland	4	7
Baotou	4	House mouse	Pasture	13	14
Ordos	5	House mouse	Natural grassland	7	9
Xilingol	5	House mouse	Natural grassland	6	10
Hohhot	1	House mouse	Natural grassland	5	10
Hohhot	2	House mouse	Natural grassland	6	12
Xilingol	2	House mouse	Pasture	10	11
Ordos	3	House mouse	Natural grassland	7	11
Xilingol	4	House mouse	Natural grassland	7	10
Hohhot	5	House mouse	Pasture	19	15
Ordos	1	House mouse	Natural grassland	1	9
Xilingol	1	House mouse	Natural grassland	4	9
Hohhot	2	House mouse	Pasture	21	14
Xilingol	2	House mouse	Natural grassland	6	12
Hohhot	3	House mouse	Natural grassland	7	12
Xilingol	3	House mouse	Natural grassland	5	12
Hohhot	4	House mouse	Natural grassland	4	9
Xilingol	4	House mouse	Pasture	15	14
Hohhot	5	House mouse	Natural grassland	6	11
Baotou	2	House mouse	Natural grassland	6	9
Baotou	3	House mouse	Natural grassland	6	12
Baotou	4	House mouse	Natural grassland	4	9
Baotou	5	House mouse	Natural grassland	7	12
Baotou	1	European Hare	Natural grassland	0	12
Baotou	2	European Hare	Natural grassland	0	9
Ordos	1	European Hare	Pasture	0	15
Xilingol	1	European Hare	Pasture	0	13
Xilingol	2	European Hare	Pasture	0	11
Hohhot	3	European Hare	Pasture	0	13
Ordos	3	European Hare	Pasture	0	15
Xilingol	3	European Hare	Pasture	0	12
Hohhot	4	European Hare	Pasture	0	13
Baotou	5	European Hare	Pasture	0	14
Hohhot	1	European Hare	Pasture	0	13
Baotou	1	European Hare	Pasture	0	15
Hohhot	2	European Hare	Pasture	0	14
Baotou	2	European Hare	Pasture	0	14
Ordos	4	European Hare	Pasture	0	16
Xilingol	4	European Hare	Pasture	0	14
Ordos	2	European Hare	Pasture	0	12
Baotou	3	European Hare	Pasture	0	14
Baotou	4	European Hare	Pasture	0	14
Hohhot	5	European Hare	Pasture	0	15
Ordos	5	European Hare	Pasture	0	11
Xilingol	5	European Hare	Pasture	0	11
Baotou	3	European Hare	Natural grassland	0	12
Ordos	1	European Hare	Natural grassland	1	9
Xilingol	1	European Hare	Natural grassland	0	9
Xilingol	2	European Hare	Natural grassland	0	12
Hohhot	3	European Hare	Natural grassland	0	12
Ordos	3	European Hare	Natural grassland	1	11
Xilingol	3	European Hare	Natural grassland	0	12
Hohhot	4	European Hare	Natural grassland	1	9
Hohhot	1	European Hare	Natural grassland	0	10
Hohhot	2	European Hare	Natural grassland	0	12
Ordos	4	European Hare	Natural grassland	0	7
Xilingol	4	European Hare	Natural grassland	0	10
Ordos	2	European Hare	Natural grassland	0	11
Baotou	4	European Hare	Natural grassland	1	9
Hohhot	5	European Hare	Natural grassland	0	11
Ordos	5	European Hare	Natural grassland	0	9
Xilingol	5	European Hare	Natural grassland	0	10
Baotou	5	European Hare	Natural grassland	0	12
Baotou	1	Golden Eagle	Natural grassland	0	12
Baotou	2	Golden Eagle	Natural grassland	0	9
Baotou	3	Golden Eagle	Natural grassland	0	12
Baotou	4	Golden Eagle	Natural grassland	0	9
Baotou	1	Golden Eagle	Pasture	0	15
Hohhot	1	Golden Eagle	Pasture	0	13
Hohhot	1	Golden Eagle	Natural grassland	0	10
Ordos	1	Golden Eagle	Pasture	0	15
Ordos	1	Golden Eagle	Natural grassland	0	9
Xilingol	1	Golden Eagle	Pasture	0	13
Xilingol	1	Golden Eagle	Natural grassland	0	9
Baotou	2	Golden Eagle	Pasture	0	14
Hohhot	2	Golden Eagle	Pasture	0	14
Hohhot	2	Golden Eagle	Natural grassland	0	12
Ordos	2	Golden Eagle	Pasture	0	12
Ordos	2	Golden Eagle	Natural grassland	0	11
Xilingol	2	Golden Eagle	Pasture	0	11
Xilingol	2	Golden Eagle	Natural grassland	0	12
Baotou	3	Golden Eagle	Pasture	1	14
Hohhot	3	Golden Eagle	Pasture	0	13
Hohhot	3	Golden Eagle	Natural grassland	0	12
Ordos	3	Golden Eagle	Pasture	0	15
Ordos	3	Golden Eagle	Natural grassland	0	11
Xilingol	3	Golden Eagle	Pasture	0	12
Xilingol	3	Golden Eagle	Natural grassland	0	12
Baotou	4	Golden Eagle	Pasture	0	14
Hohhot	4	Golden Eagle	Pasture	0	13
Hohhot	4	Golden Eagle	Natural grassland	0	9
Ordos	4	Golden Eagle	Pasture	0	16
Ordos	4	Golden Eagle	Natural grassland	0	7
Xilingol	4	Golden Eagle	Pasture	0	14
Xilingol	4	Golden Eagle	Natural grassland	0	10
Baotou	5	Golden Eagle	Pasture	0	14
Hohhot	5	Golden Eagle	Pasture	1	15
Hohhot	5	Golden Eagle	Natural grassland	0	11
Ordos	5	Golden Eagle	Pasture	0	11
Ordos	5	Golden Eagle	Natural grassland	0	9
Xilingol	5	Golden Eagle	Pasture	0	11
Xilingol	5	Golden Eagle	Natural grassland	0	10
Baotou	5	Golden Eagle	Natural grassland	0	12
Baotou	1	Chicken	Natural grassland	0	12
Baotou	2	Chicken	Natural grassland	0	9
Baotou	3	Chicken	Natural grassland	0	12
Baotou	4	Chicken	Natural grassland	0	9
Baotou	5	Chicken	Natural grassland	0	12
Baotou	1	Eurasian Magpie	Natural grassland	8	12
Baotou	2	Eurasian Magpie	Natural grassland	0	9
Baotou	3	Eurasian Magpie	Natural grassland	9	12
Baotou	4	Eurasian Magpie	Natural grassland	7	9
Baotou	1	Eurasian Magpie	Pasture	10	15
Hohhot	1	Eurasian Magpie	Pasture	0	13
Hohhot	1	Eurasian Magpie	Natural grassland	6	10
Ordos	1	Eurasian Magpie	Pasture	14	15
Ordos	1	Eurasian Magpie	Natural grassland	0	9
Xilingol	1	Eurasian Magpie	Pasture	16	13
Xilingol	1	Eurasian Magpie	Natural grassland	13	9
Baotou	2	Eurasian Magpie	Pasture	9	14
Hohhot	2	Eurasian Magpie	Pasture	14	14
Hohhot	2	Eurasian Magpie	Natural grassland	8	12
Ordos	2	Eurasian Magpie	Pasture	13	12
Ordos	2	Eurasian Magpie	Natural grassland	4	11
Xilingol	2	Eurasian Magpie	Pasture	10	11
Xilingol	2	Eurasian Magpie	Natural grassland	4	12
Baotou	3	Eurasian Magpie	Pasture	6	14
Hohhot	3	Eurasian Magpie	Pasture	0	13
Hohhot	3	Eurasian Magpie	Natural grassland	9	12
Ordos	3	Eurasian Magpie	Pasture	9	15
Ordos	3	Eurasian Magpie	Natural grassland	0	11
Xilingol	3	Eurasian Magpie	Pasture	14	12
Xilingol	3	Eurasian Magpie	Natural grassland	5	12
Baotou	4	Eurasian Magpie	Pasture	13	14
Hohhot	4	Eurasian Magpie	Pasture	0	13
Hohhot	4	Eurasian Magpie	Natural grassland	13	9
Ordos	4	Eurasian Magpie	Pasture	14	16
Ordos	4	Eurasian Magpie	Natural grassland	0	7
Xilingol	4	Eurasian Magpie	Pasture	13	14
Xilingol	4	Eurasian Magpie	Natural grassland	8	10
Baotou	5	Eurasian Magpie	Pasture	9	14
Baotou	5	Eurasian Magpie	Natural grassland	4	12
Hohhot	5	Eurasian Magpie	Pasture	8	15
Hohhot	5	Eurasian Magpie	Natural grassland	12	11
Ordos	5	Eurasian Magpie	Pasture	4	11
Ordos	5	Eurasian Magpie	Natural grassland	0	9
Xilingol	5	Eurasian Magpie	Pasture	12	11
Xilingol	5	Eurasian Magpie	Natural grassland	0	10
Baotou	1	Egret	Natural grassland	0	12
Ordos	1	Egret	Pasture	0	15
Xilingol	1	Egret	Pasture	0	13
Xilingol	2	Egret	Pasture	0	11
Hohhot	3	Egret	Pasture	0	13
Ordos	3	Egret	Pasture	1	15
Xilingol	3	Egret	Pasture	0	12
Hohhot	4	Egret	Pasture	0	13
Baotou	5	Egret	Pasture	0	14
Hohhot	1	Egret	Pasture	0	13
Ordos	1	Egret	Natural grassland	0	9
Baotou	1	Egret	Pasture	1	15
Hohhot	2	Egret	Pasture	0	14
Baotou	2	Egret	Pasture	0	14
Ordos	4	Egret	Pasture	1	16
Xilingol	4	Egret	Pasture	1	14
Hohhot	1	Egret	Natural grassland	1	10
Hohhot	2	Egret	Natural grassland	0	12
Ordos	2	Egret	Pasture	1	12
Baotou	3	Egret	Pasture	0	14
Ordos	4	Egret	Natural grassland	0	7
Baotou	4	Egret	Pasture	0	14
Xilingol	4	Egret	Natural grassland	1	10
Hohhot	5	Egret	Pasture	0	15
Ordos	5	Egret	Pasture	0	11
Xilingol	5	Egret	Pasture	0	11
Xilingol	1	Egret	Natural grassland	0	9
Ordos	2	Egret	Natural grassland	0	11
Xilingol	2	Egret	Natural grassland	0	12
Hohhot	3	Egret	Natural grassland	1	12
Ordos	3	Egret	Natural grassland	0	11
Xilingol	3	Egret	Natural grassland	0	12
Hohhot	4	Egret	Natural grassland	0	9
Hohhot	5	Egret	Natural grassland	0	11
Ordos	5	Egret	Natural grassland	0	9
Baotou	2	Egret	Natural grassland	0	9
Xilingol	5	Egret	Natural grassland	0	10
Baotou	3	Egret	Natural grassland	0	12
Baotou	4	Egret	Natural grassland	0	9
Baotou	5	Egret	Natural grassland	1	12
Baotou	1	Tick	Natural grassland	91	12
Xilingol	1	Tick	Pasture	109	13
Ordos	2	Tick	Pasture	152	12
Baotou	2	Tick	Pasture	131	14
Xilingol	2	Tick	Pasture	128	11
Baotou	3	Tick	Pasture	105	14
Xilingol	3	Tick	Pasture	143	12
Hohhot	4	Tick	Pasture	122	13
Baotou	4	Tick	Pasture	144	14
Hohhot	5	Tick	Pasture	118	15
Ordos	1	Tick	Pasture	118	15
Baotou	2	Tick	Natural grassland	63	9
Xilingol	2	Tick	Natural grassland	59	12
Ordos	3	Tick	Pasture	140	15
Xilingol	3	Tick	Natural grassland	68	12
Ordos	4	Tick	Pasture	143	16
Xilingol	5	Tick	Pasture	111	11
Hohhot	1	Tick	Pasture	58	13
Ordos	1	Tick	Natural grassland	46	9
Baotou	1	Tick	Pasture	59	15
Hohhot	2	Tick	Natural grassland	108	12
Hohhot	3	Tick	Pasture	49	13
Ordos	3	Tick	Natural grassland	55	11
Ordos	4	Tick	Natural grassland	48	7
Xilingol	4	Tick	Natural grassland	41	10
Ordos	5	Tick	Pasture	142	11
Baotou	5	Tick	Pasture	107	14
Xilingol	5	Tick	Natural grassland	101	10
Hohhot	1	Tick	Natural grassland	47	10
Xilingol	1	Tick	Natural grassland	52	9
Hohhot	2	Tick	Pasture	151	14
Ordos	2	Tick	Natural grassland	51	11
Hohhot	3	Tick	Natural grassland	43	12
Hohhot	4	Tick	Natural grassland	52	9
Xilingol	4	Tick	Pasture	130	14
Hohhot	5	Tick	Natural grassland	35	11
Ordos	5	Tick	Natural grassland	48	9
Baotou	3	Tick	Natural grassland	57	12
Baotou	4	Tick	Natural grassland	42	9
Baotou	5	Tick	Natural grassland	43	12
Baotou	1	Mosquito	Natural grassland	15	12
Baotou	2	Mosquito	Natural grassland	21	9
Ordos	1	Mosquito	Pasture	104	15
Baotou	1	Mosquito	Pasture	99	15
Xilingol	2	Mosquito	Pasture	76	11
Baotou	3	Mosquito	Pasture	88	14
Xilingol	4	Mosquito	Pasture	93	14
Hohhot	5	Mosquito	Pasture	112	15
Baotou	5	Mosquito	Pasture	79	14
Ordos	1	Mosquito	Natural grassland	18	9
Ordos	2	Mosquito	Pasture	86	12
Xilingol	4	Mosquito	Natural grassland	9	10
Hohhot	5	Mosquito	Natural grassland	29	11
Xilingol	5	Mosquito	Pasture	100	11
Hohhot	1	Mosquito	Natural grassland	21	10
Xilingol	1	Mosquito	Pasture	98	13
Hohhot	2	Mosquito	Natural grassland	26	12
Ordos	2	Mosquito	Natural grassland	25	11
Baotou	2	Mosquito	Pasture	95	14
Hohhot	3	Mosquito	Natural grassland	22	12
Ordos	3	Mosquito	Natural grassland	12	11
Xilingol	3	Mosquito	Pasture	135	12
Hohhot	4	Mosquito	Natural grassland	21	9
Ordos	4	Mosquito	Natural grassland	19	7
Baotou	4	Mosquito	Pasture	83	14
Ordos	5	Mosquito	Pasture	111	11
Xilingol	5	Mosquito	Natural grassland	20	10
Hohhot	1	Mosquito	Pasture	128	13
Xilingol	1	Mosquito	Natural grassland	20	9
Hohhot	2	Mosquito	Pasture	135	14
Xilingol	2	Mosquito	Natural grassland	25	12
Hohhot	3	Mosquito	Pasture	128	13
Ordos	3	Mosquito	Pasture	147	15
Xilingol	3	Mosquito	Natural grassland	16	12
Hohhot	4	Mosquito	Pasture	142	13
Ordos	4	Mosquito	Pasture	112	16
Ordos	5	Mosquito	Natural grassland	18	9
Baotou	3	Mosquito	Natural grassland	10	12
Baotou	4	Mosquito	Natural grassland	24	9
Baotou	5	Mosquito	Natural grassland	20	12
Baotou	1	Crow	Natural grassland	9	12
Baotou	2	Crow	Natural grassland	10	9
Baotou	3	Crow	Natural grassland	6	12
Baotou	4	Crow	Natural grassland	7	9
Baotou	1	Crow	Pasture	16	15
Hohhot	1	Crow	Pasture	13	13
Hohhot	1	Crow	Natural grassland	7	10
Ordos	1	Crow	Pasture	12	15
Ordos	1	Crow	Natural grassland	10	9
Xilingol	1	Crow	Pasture	20	13
Xilingol	1	Crow	Natural grassland	8	9
Baotou	2	Crow	Pasture	15	14
Hohhot	2	Crow	Pasture	6	14
Hohhot	2	Crow	Natural grassland	9	12
Ordos	2	Crow	Pasture	7	12
Ordos	2	Crow	Natural grassland	8	11
Xilingol	2	Crow	Pasture	0	11
Xilingol	2	Crow	Natural grassland	16	12
Baotou	3	Crow	Pasture	13	14
Hohhot	3	Crow	Pasture	5	13
Hohhot	3	Crow	Natural grassland	8	12
Ordos	3	Crow	Pasture	8	15
Ordos	3	Crow	Natural grassland	6	11
Xilingol	3	Crow	Pasture	0	12
Xilingol	3	Crow	Natural grassland	10	12
Baotou	4	Crow	Pasture	11	14
Hohhot	4	Crow	Pasture	9	13
Hohhot	4	Crow	Natural grassland	8	9
Ordos	4	Crow	Pasture	7	16
Ordos	4	Crow	Natural grassland	12	7
Xilingol	4	Crow	Pasture	15	14
Xilingol	4	Crow	Natural grassland	12	10
Baotou	5	Crow	Pasture	21	14
Hohhot	5	Crow	Pasture	18	15
Hohhot	5	Crow	Natural grassland	9	11
Ordos	5	Crow	Pasture	12	11
Ordos	5	Crow	Natural grassland	10	9
Xilingol	5	Crow	Pasture	0	11
Xilingol	5	Crow	Natural grassland	12	10
Baotou	5	Crow	Natural grassland	13	12
Baotou	1	Rock pigeon	Natural grassland	6	12
Baotou	2	Rock pigeon	Natural grassland	5	9
Hohhot	1	Rock pigeon	Pasture	11	13
Ordos	1	Rock pigeon	Pasture	15	15
Xilingol	1	Rock pigeon	Pasture	11	13
Hohhot	2	Rock pigeon	Pasture	14	14
Ordos	2	Rock pigeon	Pasture	15	12
Hohhot	3	Rock pigeon	Pasture	12	13
Baotou	3	Rock pigeon	Pasture	13	14
Xilingol	3	Rock pigeon	Pasture	14	12
Ordos	4	Rock pigeon	Pasture	13	16
Baotou	4	Rock pigeon	Pasture	12	14
Ordos	5	Rock pigeon	Pasture	12	11
Ordos	1	Rock pigeon	Natural grassland	13	9
Baotou	1	Rock pigeon	Pasture	15	15
Hohhot	2	Rock pigeon	Natural grassland	14	12
Ordos	2	Rock pigeon	Natural grassland	13	11
Ordos	3	Rock pigeon	Pasture	11	15
Hohhot	4	Rock pigeon	Pasture	15	13
Xilingol	4	Rock pigeon	Pasture	15	14
Hohhot	5	Rock pigeon	Pasture	13	15
Ordos	5	Rock pigeon	Natural grassland	13	9
Xilingol	5	Rock pigeon	Pasture	12	11
Xilingol	2	Rock pigeon	Pasture	6	11
Ordos	3	Rock pigeon	Natural grassland	7	11
Hohhot	4	Rock pigeon	Natural grassland	6	9
Xilingol	4	Rock pigeon	Natural grassland	7	10
Hohhot	5	Rock pigeon	Natural grassland	5	11
Baotou	5	Rock pigeon	Pasture	6	14
Xilingol	5	Rock pigeon	Natural grassland	7	10
Hohhot	1	Rock pigeon	Natural grassland	6	10
Xilingol	1	Rock pigeon	Natural grassland	5	9
Baotou	2	Rock pigeon	Pasture	6	14
Xilingol	2	Rock pigeon	Natural grassland	6	12
Hohhot	3	Rock pigeon	Natural grassland	7	12
Ordos	4	Rock pigeon	Natural grassland	6	7
Baotou	3	Rock pigeon	Natural grassland	10	12
Baotou	4	Rock pigeon	Natural grassland	5	9
Baotou	5	Rock pigeon	Natural grassland	5	12
Xilingol	3	Rock pigeon	Natural grassland	6	12
Baotou	1	Hen Harrier	Natural grassland	1	12
Baotou	2	Hen Harrier	Natural grassland	0	9
Hohhot	1	Hen Harrier	Pasture	0	13
Hohhot	2	Hen Harrier	Pasture	0	14
Baotou	2	Hen Harrier	Pasture	0	14
Hohhot	3	Hen Harrier	Pasture	0	13
Hohhot	4	Hen Harrier	Pasture	0	13
Ordos	4	Hen Harrier	Pasture	1	16
Hohhot	5	Hen Harrier	Pasture	0	15
Xilingol	5	Hen Harrier	Pasture	0	11
Ordos	1	Hen Harrier	Pasture	0	15
Baotou	1	Hen Harrier	Pasture	0	15
Xilingol	1	Hen Harrier	Pasture	0	13
Hohhot	2	Hen Harrier	Natural grassland	0	12
Ordos	2	Hen Harrier	Pasture	0	12
Xilingol	2	Hen Harrier	Pasture	0	11
Hohhot	3	Hen Harrier	Natural grassland	0	12
Baotou	3	Hen Harrier	Pasture	0	14
Baotou	5	Hen Harrier	Pasture	0	14
Xilingol	5	Hen Harrier	Natural grassland	0	10
Ordos	1	Hen Harrier	Natural grassland	0	9
Xilingol	1	Hen Harrier	Natural grassland	0	9
Ordos	2	Hen Harrier	Natural grassland	0	11
Xilingol	2	Hen Harrier	Natural grassland	0	12
Ordos	3	Hen Harrier	Pasture	0	15
Xilingol	3	Hen Harrier	Pasture	0	12
Xilingol	4	Hen Harrier	Pasture	0	14
Ordos	5	Hen Harrier	Pasture	0	11
Hohhot	1	Hen Harrier	Natural grassland	1	10
Ordos	3	Hen Harrier	Natural grassland	0	11
Xilingol	3	Hen Harrier	Natural grassland	0	12
Hohhot	4	Hen Harrier	Natural grassland	0	9
Ordos	4	Hen Harrier	Natural grassland	0	7
Baotou	4	Hen Harrier	Pasture	0	14
Xilingol	4	Hen Harrier	Natural grassland	0	10
Hohhot	5	Hen Harrier	Natural grassland	1	11
Ordos	5	Hen Harrier	Natural grassland	0	9
Baotou	3	Hen Harrier	Natural grassland	0	12
Baotou	4	Hen Harrier	Natural grassland	0	9
Baotou	5	Hen Harrier	Natural grassland	0	12
Baotou	1	Eurasian eagle owl	Natural grassland	0	12
Baotou	2	Eurasian eagle owl	Natural grassland	0	9
Ordos	1	Eurasian eagle owl	Pasture	0	15
Hohhot	2	Eurasian eagle owl	Pasture	0	14
Xilingol	2	Eurasian eagle owl	Pasture	0	11
Ordos	3	Eurasian eagle owl	Pasture	0	15
Baotou	3	Eurasian eagle owl	Pasture	0	14
Xilingol	3	Eurasian eagle owl	Pasture	0	12
Hohhot	5	Eurasian eagle owl	Pasture	0	15
Ordos	1	Eurasian eagle owl	Natural grassland	0	9
Baotou	1	Eurasian eagle owl	Pasture	1	15
Hohhot	2	Eurasian eagle owl	Natural grassland	1	12
Hohhot	3	Eurasian eagle owl	Pasture	0	13
Hohhot	4	Eurasian eagle owl	Pasture	0	13
Xilingol	4	Eurasian eagle owl	Pasture	0	14
Xilingol	5	Eurasian eagle owl	Pasture	0	11
Hohhot	1	Eurasian eagle owl	Pasture	0	13
Xilingol	1	Eurasian eagle owl	Pasture	1	13
Ordos	2	Eurasian eagle owl	Pasture	0	12
Baotou	2	Eurasian eagle owl	Pasture	1	14
Hohhot	3	Eurasian eagle owl	Natural grassland	0	12
Hohhot	4	Eurasian eagle owl	Natural grassland	0	9
Ordos	4	Eurasian eagle owl	Pasture	0	16
Baotou	4	Eurasian eagle owl	Pasture	0	14
Xilingol	4	Eurasian eagle owl	Natural grassland	1	10
Ordos	5	Eurasian eagle owl	Pasture	0	11
Baotou	5	Eurasian eagle owl	Pasture	1	14
Xilingol	5	Eurasian eagle owl	Natural grassland	0	10
Hohhot	1	Eurasian eagle owl	Natural grassland	0	10
Xilingol	1	Eurasian eagle owl	Natural grassland	0	9
Ordos	2	Eurasian eagle owl	Natural grassland	0	11
Xilingol	2	Eurasian eagle owl	Natural grassland	1	12
Ordos	3	Eurasian eagle owl	Natural grassland	0	11
Xilingol	3	Eurasian eagle owl	Natural grassland	1	12
Ordos	4	Eurasian eagle owl	Natural grassland	0	7
Hohhot	5	Eurasian eagle owl	Natural grassland	1	11
Ordos	5	Eurasian eagle owl	Natural grassland	0	9
Baotou	3	Eurasian eagle owl	Natural grassland	0	12
Baotou	4	Eurasian eagle owl	Natural grassland	0	9
Baotou	5	Eurasian eagle owl	Natural grassland	0	12
Baotou	1	Pig	Natural grassland	8	12
Baotou	2	Pig	Natural grassland	0	9
Hohhot	1	Pig	Pasture	1	13
Ordos	1	Pig	Pasture	1	15
Ordos	2	Pig	Pasture	4	12
Baotou	2	Pig	Pasture	3	14
Xilingol	2	Pig	Pasture	0	11
Ordos	3	Pig	Pasture	1	15
Hohhot	5	Pig	Pasture	1	15
Ordos	5	Pig	Pasture	0	11
Xilingol	1	Pig	Pasture	0	13
Baotou	3	Pig	Pasture	1	14
Hohhot	4	Pig	Pasture	4	13
Baotou	4	Pig	Pasture	6	14
Xilingol	4	Pig	Pasture	4	14
Baotou	1	Pig	Pasture	1	15
Hohhot	2	Pig	Pasture	3	14
Hohhot	3	Pig	Pasture	1	13
Xilingol	3	Pig	Pasture	1	12
Ordos	4	Pig	Pasture	1	16
Baotou	5	Pig	Pasture	1	14
Xilingol	5	Pig	Pasture	0	11
Baotou	3	Pig	Natural grassland	0	12
Hohhot	1	Pig	Natural grassland	0	10
Ordos	1	Pig	Natural grassland	0	9
Ordos	2	Pig	Natural grassland	0	11
Xilingol	2	Pig	Natural grassland	0	12
Ordos	3	Pig	Natural grassland	0	11
Hohhot	5	Pig	Natural grassland	0	11
Ordos	5	Pig	Natural grassland	0	9
Xilingol	1	Pig	Natural grassland	0	9
Hohhot	4	Pig	Natural grassland	0	9
Xilingol	4	Pig	Natural grassland	0	10
Hohhot	2	Pig	Natural grassland	0	12
Hohhot	3	Pig	Natural grassland	0	12
Xilingol	3	Pig	Natural grassland	0	12
Ordos	4	Pig	Natural grassland	0	7
Xilingol	5	Pig	Natural grassland	0	10
Baotou	4	Pig	Natural grassland	0	9
Baotou	5	Pig	Natural grassland	0	12
Baotou	1	Sheep	Natural grassland	0	12
Baotou	2	Sheep	Natural grassland	5	9
Ordos	2	Sheep	Pasture	23	12
Baotou	2	Sheep	Pasture	73	14
Baotou	3	Sheep	Pasture	75	14
Hohhot	4	Sheep	Pasture	62	13
Ordos	4	Sheep	Pasture	66	16
Baotou	4	Sheep	Pasture	108	14
Xilingol	4	Sheep	Pasture	78	14
Hohhot	5	Sheep	Pasture	22	15
Ordos	5	Sheep	Pasture	42	11
Baotou	5	Sheep	Pasture	24	14
Hohhot	1	Sheep	Pasture	31	13
Ordos	1	Sheep	Pasture	62	15
Baotou	1	Sheep	Pasture	63	15
Hohhot	2	Sheep	Pasture	45	14
Hohhot	3	Sheep	Pasture	27	13
Ordos	3	Sheep	Pasture	78	15
Xilingol	3	Sheep	Pasture	145	12
Xilingol	1	Sheep	Pasture	45	13
Xilingol	5	Sheep	Pasture	66	11
Xilingol	2	Sheep	Pasture	28	11
Baotou	3	Sheep	Natural grassland	7	12
Ordos	2	Sheep	Natural grassland	9	11
Hohhot	4	Sheep	Natural grassland	0	9
Ordos	4	Sheep	Natural grassland	0	7
Xilingol	4	Sheep	Natural grassland	0	10
Hohhot	5	Sheep	Natural grassland	6	11
Ordos	5	Sheep	Natural grassland	7	9
Hohhot	1	Sheep	Natural grassland	0	10
Ordos	1	Sheep	Natural grassland	0	9
Hohhot	2	Sheep	Natural grassland	6	12
Hohhot	3	Sheep	Natural grassland	7	12
Ordos	3	Sheep	Natural grassland	7	11
Xilingol	3	Sheep	Natural grassland	9	12
Xilingol	1	Sheep	Natural grassland	5	9
Xilingol	5	Sheep	Natural grassland	5	10
Xilingol	2	Sheep	Natural grassland	11	12
Baotou	4	Sheep	Natural grassland	0	9
Baotou	5	Sheep	Natural grassland	7	12
Baotou	1	Rabbit	Natural grassland	0	12
Baotou	2	Rabbit	Natural grassland	0	9
Ordos	1	Rabbit	Pasture	6	15
Xilingol	1	Rabbit	Pasture	0	13
Xilingol	2	Rabbit	Pasture	0	11
Hohhot	3	Rabbit	Pasture	4	13
Ordos	3	Rabbit	Pasture	12	15
Xilingol	3	Rabbit	Pasture	0	13
Hohhot	4	Rabbit	Pasture	1	13
Baotou	5	Rabbit	Pasture	0	14
Hohhot	1	Rabbit	Pasture	6	13
Baotou	1	Rabbit	Pasture	0	15
Hohhot	2	Rabbit	Pasture	3	14
Baotou	2	Rabbit	Pasture	0	14
Ordos	4	Rabbit	Pasture	5	16
Xilingol	4	Rabbit	Pasture	0	14
Ordos	2	Rabbit	Pasture	7	12
Baotou	3	Rabbit	Pasture	0	14
Baotou	4	Rabbit	Pasture	0	14
Hohhot	5	Rabbit	Pasture	1	15
Ordos	5	Rabbit	Pasture	0	11
Xilingol	5	Rabbit	Pasture	0	11
Baotou	3	Rabbit	Natural grassland	0	12
Ordos	1	Rabbit	Natural grassland	0	9
Xilingol	1	Rabbit	Natural grassland	0	9
Xilingol	2	Rabbit	Natural grassland	0	12
Hohhot	3	Rabbit	Natural grassland	0	12
Ordos	3	Rabbit	Natural grassland	0	11
Xilingol	3	Rabbit	Natural grassland	0	12
Hohhot	4	Rabbit	Natural grassland	0	9
Hohhot	1	Rabbit	Natural grassland	0	10
Hohhot	2	Rabbit	Natural grassland	0	12
Ordos	4	Rabbit	Natural grassland	0	7
Xilingol	4	Rabbit	Natural grassland	0	10
Ordos	2	Rabbit	Natural grassland	0	11
Baotou	4	Rabbit	Natural grassland	0	9
Hohhot	5	Rabbit	Natural grassland	0	11
Ordos	5	Rabbit	Natural grassland	0	9
Xilingol	5	Rabbit	Natural grassland	0	10
Baotou	5	Rabbit	Natural grassland	0	12
Xilingol	1	Chicken	Pasture	12	13
Ordos	2	Chicken	Pasture	15	12
Baotou	2	Chicken	Pasture	20	14
Xilingol	2	Chicken	Pasture	8	11
Baotou	3	Chicken	Pasture	18	14
Xilingol	3	Chicken	Pasture	27	12
Hohhot	4	Chicken	Pasture	23	13
Baotou	4	Chicken	Pasture	32	14
Hohhot	5	Chicken	Pasture	12	15
Ordos	1	Chicken	Pasture	27	15
Ordos	3	Chicken	Pasture	40	15
Ordos	4	Chicken	Pasture	33	16
Xilingol	5	Chicken	Pasture	7	11
Hohhot	1	Chicken	Pasture	18	13
Baotou	1	Chicken	Pasture	23	15
Hohhot	3	Chicken	Pasture	13	13
Ordos	5	Chicken	Pasture	26	11
Baotou	5	Chicken	Pasture	12	14
Hohhot	2	Chicken	Pasture	16	14
Xilingol	4	Chicken	Pasture	13	14
Xilingol	1	Chicken	Natural grassland	0	9
Ordos	2	Chicken	Natural grassland	0	11
Xilingol	2	Chicken	Natural grassland	0	12
Xilingol	3	Chicken	Natural grassland	0	12
Hohhot	4	Chicken	Natural grassland	0	9
Hohhot	5	Chicken	Natural grassland	0	11
Ordos	1	Chicken	Natural grassland	0	9
Ordos	3	Chicken	Natural grassland	0	11
Ordos	4	Chicken	Natural grassland	0	7
Xilingol	5	Chicken	Natural grassland	0	10
Hohhot	1	Chicken	Natural grassland	0	10
Hohhot	3	Chicken	Natural grassland	0	12
Ordos	5	Chicken	Natural grassland	0	9
Hohhot	2	Chicken	Natural grassland	5	12
Xilingol	4	Chicken	Natural grassland	0	10
Baotou	1	Cattle	Natural grassland	0	12
Baotou	2	Cattle	Natural grassland	0	9
Hohhot	1	Cattle	Pasture	13	13
Ordos	1	Cattle	Pasture	26	15
Hohhot	2	Cattle	Pasture	14	14
Ordos	2	Cattle	Pasture	9	12
Baotou	2	Cattle	Pasture	28	14
Ordos	3	Cattle	Pasture	32	15
Baotou	3	Cattle	Pasture	26	14
Ordos	4	Cattle	Pasture	24	16
Xilingol	1	Cattle	Pasture	30	13
Hohhot	3	Cattle	Pasture	10	13
Baotou	5	Cattle	Pasture	16	14
Hohhot	4	Cattle	Pasture	16	13
Xilingol	2	Cattle	Pasture	28	11
Hohhot	5	Cattle	Pasture	8	15
Baotou	4	Cattle	Pasture	63	14
Ordos	5	Cattle	Pasture	20	11
Baotou	1	Cattle	Pasture	24	15
Xilingol	3	Cattle	Pasture	44	12
Xilingol	4	Cattle	Pasture	38	14
Xilingol	5	Cattle	Pasture	32	11
Hohhot	1	Cattle	Natural grassland	0	10
Ordos	1	Cattle	Natural grassland	3	9
Hohhot	2	Cattle	Natural grassland	0	12
Ordos	2	Cattle	Natural grassland	0	11
Baotou	3	Cattle	Natural grassland	4	12
Ordos	3	Cattle	Natural grassland	0	11
Ordos	4	Cattle	Natural grassland	0	7
Xilingol	1	Cattle	Natural grassland	0	9
Hohhot	3	Cattle	Natural grassland	0	12
Hohhot	4	Cattle	Natural grassland	0	9
Xilingol	2	Cattle	Natural grassland	6	12
Hohhot	5	Cattle	Natural grassland	0	11
Ordos	5	Cattle	Natural grassland	0	9
Xilingol	3	Cattle	Natural grassland	5	12
Xilingol	4	Cattle	Natural grassland	0	10
Xilingol	5	Cattle	Natural grassland	7	10
Baotou	4	Cattle	Natural grassland	0	9
Baotou	5	Cattle	Natural grassland	5	12
Baotou	1	Homo	Natural grassland	0	12
Baotou	2	Homo	Natural grassland	1	9
Ordos	1	Homo	Pasture	3	15
Baotou	1	Homo	Pasture	1	15
Xilingol	1	Homo	Pasture	1	13
Hohhot	3	Homo	Pasture	3	13
Baotou	3	Homo	Pasture	3	14
Xilingol	3	Homo	Pasture	4	12
Hohhot	4	Homo	Pasture	1	13
Ordos	4	Homo	Pasture	1	16
Ordos	5	Homo	Pasture	1	11
Baotou	5	Homo	Pasture	3	14
Xilingol	5	Homo	Pasture	1	11
Hohhot	1	Homo	Pasture	1	13
Ordos	2	Homo	Pasture	3	12
Baotou	2	Homo	Pasture	1	14
Ordos	3	Homo	Pasture	1	15
Baotou	4	Homo	Pasture	5	14
Xilingol	2	Homo	Pasture	3	11
Hohhot	5	Homo	Pasture	3	15
Hohhot	2	Homo	Pasture	1	14
Xilingol	4	Homo	Pasture	1	14
Baotou	3	Homo	Natural grassland	1	12
Ordos	1	Homo	Natural grassland	0	9
Xilingol	1	Homo	Natural grassland	0	9
Hohhot	3	Homo	Natural grassland	1	12
Xilingol	3	Homo	Natural grassland	2	12
Hohhot	4	Homo	Natural grassland	0	9
Ordos	4	Homo	Natural grassland	0	7
Ordos	5	Homo	Natural grassland	1	9
Xilingol	5	Homo	Natural grassland	2	10
Hohhot	1	Homo	Natural grassland	0	10
Ordos	2	Homo	Natural grassland	1	11
Ordos	3	Homo	Natural grassland	1	11
Xilingol	2	Homo	Natural grassland	2	12
Hohhot	5	Homo	Natural grassland	0	11
Hohhot	2	Homo	Natural grassland	1	12
Xilingol	4	Homo	Natural grassland	0	10
Baotou	4	Homo	Natural grassland	0	9
Baotou	5	Homo	Natural grassland	1	12

## Sheet: locate
city	locate id	lon	lat	area_Pasture/ha	area_Natural_grassland/ha
Baotou	1	110.535	42.5515	50	200
Baotou	2	109.503	42.5412	50	200
Baotou	3	110.012	41.6466	50	200
Baotou	4	109.803	40.5841	50	200
Baotou	5	110.889	41.8164	50	200
Hohhot	1	111.258	40.2017	50	200
Hohhot	2	112.126	40.1388	50	200
Hohhot	3	111.141	40.8008	50	200
Hohhot	4	111.866	41.083	50	200
Hohhot	5	111.063	41.183	50	200
Ordos	1	108.05	39.036	50	200
Ordos	2	109.332	39.0785	50	200
Ordos	3	107.133	39.8979	50	200
Ordos	4	106.708	38.2076	50	200
Ordos	5	108.199	40.0553	50	200
Xilingol	1	115.111	43.8926	50	200
Xilingol	2	117.698	44.4811	50	200
Xilingol	3	115.95	43.0959	50	200
Xilingol	4	116.193	42.1992	50	200
Xilingol	5	115.197	42.086	50	200
				1000	4000
