# Supplementary material for: Ecological Boundaries Drive Microbial Diversity and Spillover Risk in Mixed Pastoral Systems of Inner Mongolia
Source: Research Square preprint supplement (doi:10.21203/rs.3.rs-7765229/v1), 2025-10-07
Supplement: Supplementary file 4 [file eef9385ab8033fb84e840510.xlsx]

## Sheet: 随机森林预测事件
species1	species2	microbe	predicted_prob
Eurasian tree sparrow	Pig	Yersinia	1
Eurasian tree sparrow	Pig	Lactobacillus	0.992
Eurasian tree sparrow	Pig	Enterococcus	0.992
Eurasian tree sparrow	Pig	Listeria	0.96
Eurasian tree sparrow	Pig	Clostridioides	0.954
Eurasian tree sparrow	Pig	Acanthamoeba	0.95
Eurasian tree sparrow	Pig	Neisseria	0.916
Eurasian tree sparrow	Pig	Bacteroides	0.904
Eurasian tree sparrow	Pig	Trypanosoma	0.724
Eurasian tree sparrow	Pig	Anaplasma	0.646
Eurasian tree sparrow	Pig	Retroviridae	0.64
Eurasian tree sparrow	Pig	Lactiplantibacillus	0.552
Eurasian tree sparrow	Pig	Campylobacter	0.55
Eurasian tree sparrow	Pig	Brachyspira	0.546
Eurasian tree sparrow	Pig	Lachnoclostridium	0.53
Eurasian tree sparrow	Pig	Mycoplasma	0.504
Rock pigeon	Pig	Yersinia	1
Rock pigeon	Pig	Lactobacillus	0.922
Rock pigeon	Pig	Acanthamoeba	0.904
Rock pigeon	Pig	Bacteroides	0.88
Rock pigeon	Pig	Trypanosoma	0.856
Rock pigeon	Pig	Neisseria	0.766
Rock pigeon	Pig	Retroviridae	0.764
Rock pigeon	Pig	Shigella	0.608
Rock pigeon	Pig	Enterococcus	0.584
Rock pigeon	Eurasian tree sparrow	Yersinia	1
Rock pigeon	Eurasian tree sparrow	Lactobacillus	0.98
Rock pigeon	Eurasian tree sparrow	Neisseria	0.932
Rock pigeon	Eurasian tree sparrow	Anaplasma	0.766
Rock pigeon	Eurasian tree sparrow	Enterococcus	0.704
Rock pigeon	Eurasian tree sparrow	Acanthamoeba	0.692
Rock pigeon	Eurasian tree sparrow	Retroviridae	0.688
Rock pigeon	Eurasian tree sparrow	Clostridioides	0.67
Rock pigeon	Eurasian tree sparrow	Shigella	0.626
Rock pigeon	Eurasian tree sparrow	Listeria	0.616
Rock pigeon	Eurasian tree sparrow	Bacteroides	0.59
Rock pigeon	Eurasian tree sparrow	Trypanosoma	0.58
Rock pigeon	Eurasian tree sparrow	Flaviviridae	0.538
Rock pigeon	Eurasian tree sparrow	Campylobacter	0.522
Sheep	Pig	Yersinia	1
Sheep	Pig	Lactobacillus	0.994
Sheep	Pig	Retroviridae	0.954
Sheep	Pig	Listeria	0.954
Sheep	Pig	Enterococcus	0.948
Sheep	Pig	Clostridioides	0.948
Sheep	Pig	Anaplasma	0.916
Sheep	Pig	Neisseria	0.874
Sheep	Pig	Shigella	0.864
Sheep	Pig	Bacteroides	0.854
Sheep	Pig	Mycoplasma	0.826
Sheep	Pig	Fusobacterium	0.816
Sheep	Pig	Campylobacter	0.8
Sheep	Pig	Lactococcus	0.762
Sheep	Pig	Acanthamoeba	0.746
Sheep	Pig	Brachyspira	0.716
Sheep	Pig	Lachnoclostridium	0.668
Sheep	Pig	Eggerthia	0.608
Sheep	Pig	Lactiplantibacillus	0.58
Sheep	Pig	Trypanosoma	0.514
Sheep	Eurasian tree sparrow	Yersinia	1
Sheep	Eurasian tree sparrow	Enterococcus	0.992
Sheep	Eurasian tree sparrow	Lactobacillus	0.972
Sheep	Eurasian tree sparrow	Listeria	0.964
Sheep	Eurasian tree sparrow	Clostridioides	0.948
Sheep	Eurasian tree sparrow	Acanthamoeba	0.948
Sheep	Eurasian tree sparrow	Bacteroides	0.93
Sheep	Eurasian tree sparrow	Neisseria	0.922
Sheep	Eurasian tree sparrow	Anaplasma	0.662
Sheep	Eurasian tree sparrow	Retroviridae	0.658
Sheep	Eurasian tree sparrow	Trypanosoma	0.632
Sheep	Eurasian tree sparrow	Lactiplantibacillus	0.568
Sheep	Eurasian tree sparrow	Lachnoclostridium	0.556
Sheep	Eurasian tree sparrow	Brachyspira	0.528
Sheep	Eurasian tree sparrow	Campylobacter	0.526
Sheep	Rock pigeon	Yersinia	1
Sheep	Rock pigeon	Lactobacillus	0.954
Sheep	Rock pigeon	Bacteroides	0.94
Sheep	Rock pigeon	Acanthamoeba	0.818
Sheep	Rock pigeon	Trypanosoma	0.814
Sheep	Rock pigeon	Neisseria	0.766
Sheep	Rock pigeon	Retroviridae	0.764
Sheep	Rock pigeon	Shigella	0.608
Sheep	Rock pigeon	Enterococcus	0.584
Rabbit	Pig	Yersinia	1
Rabbit	Pig	Enterococcus	1
Rabbit	Pig	Bacteroides	0.946
Rabbit	Pig	Trypanosoma	0.902
Rabbit	Pig	Lactobacillus	0.86
Rabbit	Pig	Acanthamoeba	0.836
Rabbit	Pig	Fusobacterium	0.784
Rabbit	Pig	Listeria	0.674
Rabbit	Pig	Brachyspira	0.636
Rabbit	Pig	Campylobacter	0.592
Rabbit	Pig	Mycoplasma	0.56
Rabbit	Eurasian tree sparrow	Yersinia	1
Rabbit	Eurasian tree sparrow	Enterococcus	0.992
Rabbit	Eurasian tree sparrow	Trypanosoma	0.928
Rabbit	Eurasian tree sparrow	Bacteroides	0.886
Rabbit	Eurasian tree sparrow	Acanthamoeba	0.86
Rabbit	Eurasian tree sparrow	Lactobacillus	0.778
Rabbit	Eurasian tree sparrow	Campylobacter	0.594
Rabbit	Eurasian tree sparrow	Brachyspira	0.544
Rabbit	Eurasian tree sparrow	Fusobacterium	0.54
Rabbit	Rock pigeon	Yersinia	1
Rabbit	Rock pigeon	Lactobacillus	0.996
Rabbit	Rock pigeon	Trypanosoma	0.99
Rabbit	Rock pigeon	Acanthamoeba	0.936
Rabbit	Rock pigeon	Enterococcus	0.86
Rabbit	Rock pigeon	Bacteroides	0.83
Rabbit	Rock pigeon	Retroviridae	0.578
Rabbit	Rock pigeon	Listeria	0.578
Rabbit	Sheep	Yersinia	1
Rabbit	Sheep	Enterococcus	0.998
Rabbit	Sheep	Lactobacillus	0.996
Rabbit	Sheep	Listeria	0.956
Rabbit	Sheep	Clostridioides	0.952
Rabbit	Sheep	Retroviridae	0.918
Rabbit	Sheep	Anaplasma	0.906
Rabbit	Sheep	Acanthamoeba	0.858
Rabbit	Sheep	Bacteroides	0.828
Rabbit	Sheep	Shigella	0.778
Rabbit	Sheep	Mycoplasma	0.742
Rabbit	Sheep	Fusobacterium	0.742
Rabbit	Sheep	Neisseria	0.694
Rabbit	Sheep	Brachyspira	0.628
Rabbit	Sheep	Trypanosoma	0.602
House mouse	Pig	Yersinia	1
House mouse	Pig	Lactobacillus	1
House mouse	Pig	Enterococcus	1
House mouse	Pig	Listeria	0.962
House mouse	Pig	Retroviridae	0.938
House mouse	Pig	Clostridioides	0.936
House mouse	Pig	Anaplasma	0.902
House mouse	Pig	Acanthamoeba	0.888
House mouse	Pig	Mycoplasma	0.866
House mouse	Pig	Neisseria	0.832
House mouse	Pig	Fusobacterium	0.816
House mouse	Pig	Shigella	0.804
House mouse	Pig	Campylobacter	0.762
House mouse	Pig	Lactococcus	0.74
House mouse	Pig	Trypanosoma	0.696
House mouse	Pig	Bacteroides	0.642
House mouse	Pig	Eggerthia	0.51
House mouse	Eurasian tree sparrow	Yersinia	1
House mouse	Eurasian tree sparrow	Lactobacillus	0.988
House mouse	Eurasian tree sparrow	Trypanosoma	0.98
House mouse	Eurasian tree sparrow	Acanthamoeba	0.934
House mouse	Eurasian tree sparrow	Enterococcus	0.91
House mouse	Eurasian tree sparrow	Neisseria	0.662
House mouse	Eurasian tree sparrow	Bacteroides	0.628
House mouse	Eurasian tree sparrow	Listeria	0.596
House mouse	Eurasian tree sparrow	Retroviridae	0.548
House mouse	Rock pigeon	Yersinia	1
House mouse	Rock pigeon	Lactobacillus	0.926
House mouse	Rock pigeon	Acanthamoeba	0.886
House mouse	Rock pigeon	Trypanosoma	0.88
House mouse	Rock pigeon	Neisseria	0.766
House mouse	Rock pigeon	Retroviridae	0.764
House mouse	Rock pigeon	Bacteroides	0.656
House mouse	Rock pigeon	Enterococcus	0.624
House mouse	Rock pigeon	Shigella	0.544
House mouse	Sheep	Yersinia	1
House mouse	Sheep	Lactobacillus	1
House mouse	Sheep	Neisseria	0.982
House mouse	Sheep	Anaplasma	0.936
House mouse	Sheep	Enterococcus	0.928
House mouse	Sheep	Mycoplasma	0.918
House mouse	Sheep	Retroviridae	0.914
House mouse	Sheep	Clostridioides	0.91
House mouse	Sheep	Shigella	0.9
House mouse	Sheep	Listeria	0.9
House mouse	Sheep	Campylobacter	0.878
House mouse	Sheep	Lactococcus	0.87
House mouse	Sheep	Fusobacterium	0.854
House mouse	Sheep	Eggerthia	0.758
House mouse	Sheep	Chlamydia	0.736
House mouse	Sheep	Acanthamoeba	0.62
House mouse	Rabbit	Yersinia	1
House mouse	Rabbit	Lactobacillus	1
House mouse	Rabbit	Trypanosoma	0.984
House mouse	Rabbit	Enterococcus	0.958
House mouse	Rabbit	Acanthamoeba	0.926
House mouse	Rabbit	Listeria	0.738
House mouse	Rabbit	Bacteroides	0.686
House mouse	Rabbit	Fusobacterium	0.646
House mouse	Rabbit	Mycoplasma	0.622
House mouse	Rabbit	Retroviridae	0.548
House mouse	Rabbit	Phycomyces	0.51
Mosquito	Pig	Yersinia	1
Mosquito	Pig	Enterococcus	1
Mosquito	Pig	Shigella	0.944
Mosquito	Pig	Lactobacillus	0.928
Mosquito	Pig	Campylobacter	0.928
Mosquito	Pig	Acanthamoeba	0.906
Mosquito	Pig	Bacteroides	0.89
Mosquito	Pig	Anaplasma	0.858
Mosquito	Pig	Trypanosoma	0.776
Mosquito	Pig	Listeria	0.764
Mosquito	Pig	Clostridioides	0.724
Mosquito	Pig	Neisseria	0.694
Mosquito	Pig	Brachyspira	0.626
Mosquito	Eurasian tree sparrow	Yersinia	1
Mosquito	Eurasian tree sparrow	Trypanosoma	0.986
Mosquito	Eurasian tree sparrow	Enterococcus	0.982
Mosquito	Eurasian tree sparrow	Bacteroides	0.946
Mosquito	Eurasian tree sparrow	Campylobacter	0.938
Mosquito	Eurasian tree sparrow	Lactobacillus	0.93
Mosquito	Eurasian tree sparrow	Acanthamoeba	0.874
Mosquito	Eurasian tree sparrow	Cryptosporidium	0.65
Mosquito	Eurasian tree sparrow	Eimeria	0.622
Mosquito	Eurasian tree sparrow	Fusobacterium	0.596
Mosquito	Eurasian tree sparrow	Listeria	0.58
Mosquito	Eurasian tree sparrow	Flaviviridae	0.544
Mosquito	Rock pigeon	Yersinia	1
Mosquito	Rock pigeon	Trypanosoma	1
Mosquito	Rock pigeon	Bacteroides	0.992
Mosquito	Rock pigeon	Lactobacillus	0.946
Mosquito	Rock pigeon	Enterococcus	0.902
Mosquito	Rock pigeon	Acanthamoeba	0.872
Mosquito	Rock pigeon	Campylobacter	0.836
Mosquito	Rock pigeon	Eimeria	0.754
Mosquito	Rock pigeon	Cryptosporidium	0.716
Mosquito	Rock pigeon	Shigella	0.532
Mosquito	Rock pigeon	Listeria	0.528
Mosquito	Sheep	Yersinia	1
Mosquito	Sheep	Enterococcus	1
Mosquito	Sheep	Lactobacillus	0.96
Mosquito	Sheep	Shigella	0.946
Mosquito	Sheep	Bacteroides	0.926
Mosquito	Sheep	Acanthamoeba	0.896
Mosquito	Sheep	Campylobacter	0.894
Mosquito	Sheep	Anaplasma	0.858
Mosquito	Sheep	Listeria	0.798
Mosquito	Sheep	Clostridioides	0.748
Mosquito	Sheep	Trypanosoma	0.744
Mosquito	Sheep	Neisseria	0.69
Mosquito	Sheep	Brachyspira	0.572
Mosquito	Rabbit	Yersinia	1
Mosquito	Rabbit	Enterococcus	0.998
Mosquito	Rabbit	Shigella	0.936
Mosquito	Rabbit	Acanthamoeba	0.904
Mosquito	Rabbit	Lactobacillus	0.888
Mosquito	Rabbit	Bacteroides	0.844
Mosquito	Rabbit	Anaplasma	0.822
Mosquito	Rabbit	Trypanosoma	0.77
Mosquito	Rabbit	Campylobacter	0.738
Mosquito	Rabbit	Listeria	0.726
Mosquito	Rabbit	Clostridioides	0.65
Mosquito	Rabbit	Brachyspira	0.616
Mosquito	Rabbit	Neisseria	0.532
Mosquito	House mouse	Yersinia	1
Mosquito	House mouse	Trypanosoma	0.986
Mosquito	House mouse	Enterococcus	0.982
Mosquito	House mouse	Campylobacter	0.938
Mosquito	House mouse	Lactobacillus	0.932
Mosquito	House mouse	Acanthamoeba	0.874
Mosquito	House mouse	Bacteroides	0.846
Mosquito	House mouse	Fusobacterium	0.596
Mosquito	House mouse	Listeria	0.592
Mosquito	House mouse	Flaviviridae	0.55
Mosquito	House mouse	Eimeria	0.548
Mosquito	House mouse	Cryptosporidium	0.53
Mosquito	House mouse	Shigella	0.524
Tick	Pig	Yersinia	1
Tick	Pig	Enterococcus	1
Tick	Pig	Campylobacter	0.962
Tick	Pig	Shigella	0.948
Tick	Pig	Bacteroides	0.912
Tick	Pig	Acanthamoeba	0.894
Tick	Pig	Lactobacillus	0.892
Tick	Pig	Anaplasma	0.868
Tick	Pig	Trypanosoma	0.802
Tick	Pig	Listeria	0.762
Tick	Pig	Clostridioides	0.734
Tick	Pig	Retroviridae	0.728
Tick	Eurasian tree sparrow	Yersinia	1
Tick	Eurasian tree sparrow	Trypanosoma	0.996
Tick	Eurasian tree sparrow	Bacteroides	0.996
Tick	Eurasian tree sparrow	Enterococcus	0.988
Tick	Eurasian tree sparrow	Campylobacter	0.972
Tick	Eurasian tree sparrow	Lactobacillus	0.882
Tick	Eurasian tree sparrow	Acanthamoeba	0.82
Tick	Eurasian tree sparrow	Eimeria	0.72
Tick	Eurasian tree sparrow	Cryptosporidium	0.706
Tick	Eurasian tree sparrow	Listeria	0.544
Tick	Eurasian tree sparrow	Shigella	0.508
Tick	Rock pigeon	Yersinia	1
Tick	Rock pigeon	Bacteroides	0.998
Tick	Rock pigeon	Trypanosoma	0.994
Tick	Rock pigeon	Enterococcus	0.916
Tick	Rock pigeon	Campylobacter	0.884
Tick	Rock pigeon	Lactobacillus	0.848
Tick	Rock pigeon	Eimeria	0.764
Tick	Rock pigeon	Cryptosporidium	0.71
Tick	Rock pigeon	Acanthamoeba	0.658
Tick	Rock pigeon	Shigella	0.568
Tick	Sheep	Yersinia	1
Tick	Sheep	Enterococcus	1
Tick	Sheep	Lactobacillus	0.938
Tick	Sheep	Bacteroides	0.936
Tick	Sheep	Campylobacter	0.896
Tick	Sheep	Shigella	0.892
Tick	Sheep	Anaplasma	0.868
Tick	Sheep	Acanthamoeba	0.858
Tick	Sheep	Listeria	0.782
Tick	Sheep	Clostridioides	0.748
Tick	Sheep	Trypanosoma	0.736
Tick	Sheep	Retroviridae	0.73
Tick	Sheep	Chlamydia	0.524
Tick	Rabbit	Yersinia	1
Tick	Rabbit	Enterococcus	1
Tick	Rabbit	Shigella	0.962
Tick	Rabbit	Lactobacillus	0.96
Tick	Rabbit	Bacteroides	0.926
Tick	Rabbit	Acanthamoeba	0.892
Tick	Rabbit	Anaplasma	0.858
Tick	Rabbit	Trypanosoma	0.846
Tick	Rabbit	Campylobacter	0.822
Tick	Rabbit	Listeria	0.798
Tick	Rabbit	Clostridioides	0.748
Tick	Rabbit	Retroviridae	0.554
Tick	House mouse	Yersinia	1
Tick	House mouse	Enterococcus	1
Tick	House mouse	Campylobacter	0.966
Tick	House mouse	Shigella	0.954
Tick	House mouse	Lactobacillus	0.93
Tick	House mouse	Acanthamoeba	0.9
Tick	House mouse	Bacteroides	0.848
Tick	House mouse	Anaplasma	0.846
Tick	House mouse	Trypanosoma	0.842
Tick	House mouse	Listeria	0.772
Tick	House mouse	Clostridioides	0.73
Tick	House mouse	Retroviridae	0.67
Tick	Mosquito	Yersinia	1
Tick	Mosquito	Lactobacillus	0.98
Tick	Mosquito	Bacteroides	0.974
Tick	Mosquito	Enterococcus	0.954
Tick	Mosquito	Trypanosoma	0.856
Tick	Mosquito	Anaplasma	0.848
Tick	Mosquito	Acanthamoeba	0.836
Tick	Mosquito	Clostridioides	0.832
Tick	Mosquito	Listeria	0.828
Tick	Mosquito	Shigella	0.732
Tick	Mosquito	Neisseria	0.64
Tick	Mosquito	Campylobacter	0.604
Tick	Mosquito	Allomyces	0.53
Tick	Mosquito	Chuviridae	0.526
Tick	Mosquito	Rhabdoviridae	0.522
Tick	Mosquito	Phenuiviridae	0.52
Homo	Pig	Yersinia	1
Homo	Pig	Enterococcus	1
Homo	Pig	Shigella	0.922
Homo	Pig	Campylobacter	0.902
Homo	Pig	Acanthamoeba	0.884
Homo	Pig	Anaplasma	0.836
Homo	Pig	Retroviridae	0.734
Homo	Pig	Brachyspira	0.732
Homo	Pig	Neisseria	0.63
Homo	Eurasian tree sparrow	Yersinia	1
Homo	Eurasian tree sparrow	Enterococcus	0.946
Homo	Eurasian tree sparrow	Acanthamoeba	0.848
Homo	Eurasian tree sparrow	Trypanosoma	0.752
Homo	Eurasian tree sparrow	Lactobacillus	0.732
Homo	Eurasian tree sparrow	Bacteroides	0.722
Homo	Eurasian tree sparrow	Campylobacter	0.718
Homo	Eurasian tree sparrow	Bordetella	0.5
Homo	Rock pigeon	Yersinia	1
Homo	Rock pigeon	Acanthamoeba	0.904
Homo	Rock pigeon	Lactobacillus	0.85
Homo	Rock pigeon	Trypanosoma	0.806
Homo	Rock pigeon	Neisseria	0.766
Homo	Rock pigeon	Retroviridae	0.764
Homo	Rock pigeon	Bacteroides	0.702
Homo	Rock pigeon	Shigella	0.608
Homo	Rock pigeon	Enterococcus	0.584
Homo	Sheep	Yersinia	1
Homo	Sheep	Enterococcus	1
Homo	Sheep	Shigella	0.922
Homo	Sheep	Campylobacter	0.902
Homo	Sheep	Acanthamoeba	0.86
Homo	Sheep	Anaplasma	0.836
Homo	Sheep	Brachyspira	0.744
Homo	Sheep	Retroviridae	0.734
Homo	Sheep	Neisseria	0.63
Homo	Rabbit	Yersinia	1
Homo	Rabbit	Enterococcus	0.988
Homo	Rabbit	Shigella	0.886
Homo	Rabbit	Acanthamoeba	0.876
Homo	Rabbit	Anaplasma	0.82
Homo	Rabbit	Campylobacter	0.718
Homo	Rabbit	Retroviridae	0.71
Homo	Rabbit	Brachyspira	0.696
Homo	Rabbit	Lactobacillus	0.544
Homo	House mouse	Yersinia	1
Homo	House mouse	Enterococcus	1
Homo	House mouse	Shigella	0.922
Homo	House mouse	Campylobacter	0.902
Homo	House mouse	Acanthamoeba	0.884
Homo	House mouse	Anaplasma	0.836
Homo	House mouse	Retroviridae	0.734
Homo	House mouse	Brachyspira	0.642
Homo	House mouse	Neisseria	0.63
Homo	Mosquito	Yersinia	1
Homo	Mosquito	Enterococcus	1
Homo	Mosquito	Shigella	0.944
Homo	Mosquito	Campylobacter	0.93
Homo	Mosquito	Acanthamoeba	0.906
Homo	Mosquito	Lactobacillus	0.854
Homo	Mosquito	Anaplasma	0.852
Homo	Mosquito	Bacteroides	0.802
Homo	Mosquito	Trypanosoma	0.722
Homo	Mosquito	Neisseria	0.692
Homo	Mosquito	Listeria	0.692
Homo	Mosquito	Clostridioides	0.658
Homo	Mosquito	Brachyspira	0.626
Homo	Tick	Yersinia	1
Homo	Tick	Enterococcus	1
Homo	Tick	Campylobacter	0.964
Homo	Tick	Shigella	0.95
Homo	Tick	Acanthamoeba	0.884
Homo	Tick	Anaplasma	0.866
Homo	Tick	Lactobacillus	0.836
Homo	Tick	Bacteroides	0.83
Homo	Tick	Trypanosoma	0.774
Homo	Tick	Retroviridae	0.728
Homo	Tick	Listeria	0.714
Homo	Tick	Clostridioides	0.69
Circus cyaneus	Pig	Enterococcus	1
Circus cyaneus	Pig	Campylobacter	1
Circus cyaneus	Pig	Bacteroides	1
Circus cyaneus	Pig	Trypanosoma	0.994
Circus cyaneus	Pig	Yersinia	0.966
Circus cyaneus	Pig	Fusobacterium	0.916
Circus cyaneus	Pig	Shigella	0.78
Circus cyaneus	Pig	Lactobacillus	0.532
Circus cyaneus	Eurasian tree sparrow	Trypanosoma	1
Circus cyaneus	Eurasian tree sparrow	Bacteroides	1
Circus cyaneus	Eurasian tree sparrow	Enterococcus	0.898
Circus cyaneus	Eurasian tree sparrow	Yersinia	0.878
Circus cyaneus	Eurasian tree sparrow	Cryptosporidium	0.812
Circus cyaneus	Eurasian tree sparrow	Campylobacter	0.806
Circus cyaneus	Eurasian tree sparrow	Stenotrophomonas	0.802
Circus cyaneus	Eurasian tree sparrow	Fusobacterium	0.756
Circus cyaneus	Eurasian tree sparrow	Eimeria	0.736
Circus cyaneus	Eurasian tree sparrow	Lactobacillus	0.724
Circus cyaneus	Rock pigeon	Trypanosoma	1
Circus cyaneus	Rock pigeon	Bacteroides	1
Circus cyaneus	Rock pigeon	Enterococcus	0.898
Circus cyaneus	Rock pigeon	Yersinia	0.878
Circus cyaneus	Rock pigeon	Cryptosporidium	0.812
Circus cyaneus	Rock pigeon	Campylobacter	0.806
Circus cyaneus	Rock pigeon	Stenotrophomonas	0.802
Circus cyaneus	Rock pigeon	Fusobacterium	0.756
Circus cyaneus	Rock pigeon	Eimeria	0.736
Circus cyaneus	Rock pigeon	Lactobacillus	0.724
Circus cyaneus	Sheep	Enterococcus	1
Circus cyaneus	Sheep	Campylobacter	1
Circus cyaneus	Sheep	Bacteroides	1
Circus cyaneus	Sheep	Trypanosoma	0.994
Circus cyaneus	Sheep	Yersinia	0.966
Circus cyaneus	Sheep	Fusobacterium	0.916
Circus cyaneus	Sheep	Shigella	0.78
Circus cyaneus	Sheep	Lactobacillus	0.532
Circus cyaneus	Rabbit	Enterococcus	1
Circus cyaneus	Rabbit	Campylobacter	1
Circus cyaneus	Rabbit	Bacteroides	1
Circus cyaneus	Rabbit	Trypanosoma	0.994
Circus cyaneus	Rabbit	Yersinia	0.966
Circus cyaneus	Rabbit	Fusobacterium	0.916
Circus cyaneus	Rabbit	Shigella	0.78
Circus cyaneus	Rabbit	Lactobacillus	0.532
Circus cyaneus	House mouse	Trypanosoma	1
Circus cyaneus	House mouse	Campylobacter	0.998
Circus cyaneus	House mouse	Enterococcus	0.992
Circus cyaneus	House mouse	Bacteroides	0.992
Circus cyaneus	House mouse	Fusobacterium	0.876
Circus cyaneus	House mouse	Eimeria	0.786
Circus cyaneus	House mouse	Yersinia	0.762
Circus cyaneus	House mouse	Lactobacillus	0.704
Circus cyaneus	House mouse	Cryptosporidium	0.678
Circus cyaneus	House mouse	Stenotrophomonas	0.59
Circus cyaneus	Mosquito	Trypanosoma	1
Circus cyaneus	Mosquito	Campylobacter	0.998
Circus cyaneus	Mosquito	Enterococcus	0.992
Circus cyaneus	Mosquito	Bacteroides	0.992
Circus cyaneus	Mosquito	Fusobacterium	0.876
Circus cyaneus	Mosquito	Eimeria	0.786
Circus cyaneus	Mosquito	Yersinia	0.762
Circus cyaneus	Mosquito	Lactobacillus	0.704
Circus cyaneus	Mosquito	Cryptosporidium	0.678
Circus cyaneus	Mosquito	Stenotrophomonas	0.59
Circus cyaneus	Tick	Enterococcus	1
Circus cyaneus	Tick	Campylobacter	1
Circus cyaneus	Tick	Bacteroides	1
Circus cyaneus	Tick	Trypanosoma	0.994
Circus cyaneus	Tick	Yersinia	0.966
Circus cyaneus	Tick	Fusobacterium	0.916
Circus cyaneus	Tick	Shigella	0.78
Circus cyaneus	Tick	Lactobacillus	0.532
Circus cyaneus	Homo	Enterococcus	1
Circus cyaneus	Homo	Campylobacter	1
Circus cyaneus	Homo	Bacteroides	1
Circus cyaneus	Homo	Trypanosoma	0.994
Circus cyaneus	Homo	Yersinia	0.966
Circus cyaneus	Homo	Fusobacterium	0.916
Circus cyaneus	Homo	Shigella	0.78
Circus cyaneus	Homo	Lactobacillus	0.532
Great bustard	Pig	Enterococcus	1
Great bustard	Pig	Campylobacter	1
Great bustard	Pig	Bacteroides	1
Great bustard	Pig	Trypanosoma	0.994
Great bustard	Pig	Yersinia	0.966
Great bustard	Pig	Fusobacterium	0.916
Great bustard	Pig	Shigella	0.78
Great bustard	Pig	Lactobacillus	0.532
Great bustard	Eurasian tree sparrow	Trypanosoma	1
Great bustard	Eurasian tree sparrow	Bacteroides	1
Great bustard	Eurasian tree sparrow	Enterococcus	0.898
Great bustard	Eurasian tree sparrow	Yersinia	0.878
Great bustard	Eurasian tree sparrow	Cryptosporidium	0.812
Great bustard	Eurasian tree sparrow	Campylobacter	0.806
Great bustard	Eurasian tree sparrow	Stenotrophomonas	0.802
Great bustard	Eurasian tree sparrow	Fusobacterium	0.756
Great bustard	Eurasian tree sparrow	Eimeria	0.736
Great bustard	Eurasian tree sparrow	Lactobacillus	0.724
Great bustard	Rock pigeon	Trypanosoma	1
Great bustard	Rock pigeon	Bacteroides	1
Great bustard	Rock pigeon	Enterococcus	0.898
Great bustard	Rock pigeon	Yersinia	0.878
Great bustard	Rock pigeon	Cryptosporidium	0.812
Great bustard	Rock pigeon	Campylobacter	0.806
Great bustard	Rock pigeon	Stenotrophomonas	0.802
Great bustard	Rock pigeon	Fusobacterium	0.756
Great bustard	Rock pigeon	Eimeria	0.736
Great bustard	Rock pigeon	Lactobacillus	0.724
Great bustard	Sheep	Enterococcus	1
Great bustard	Sheep	Campylobacter	1
Great bustard	Sheep	Bacteroides	1
Great bustard	Sheep	Trypanosoma	0.994
Great bustard	Sheep	Yersinia	0.966
Great bustard	Sheep	Fusobacterium	0.916
Great bustard	Sheep	Shigella	0.78
Great bustard	Sheep	Lactobacillus	0.532
Great bustard	Rabbit	Enterococcus	1
Great bustard	Rabbit	Campylobacter	1
Great bustard	Rabbit	Bacteroides	1
Great bustard	Rabbit	Trypanosoma	0.994
Great bustard	Rabbit	Yersinia	0.966
Great bustard	Rabbit	Fusobacterium	0.916
Great bustard	Rabbit	Shigella	0.78
Great bustard	Rabbit	Lactobacillus	0.532
Great bustard	House mouse	Enterococcus	1
Great bustard	House mouse	Campylobacter	1
Great bustard	House mouse	Bacteroides	1
Great bustard	House mouse	Trypanosoma	0.994
Great bustard	House mouse	Yersinia	0.966
Great bustard	House mouse	Fusobacterium	0.916
Great bustard	House mouse	Shigella	0.78
Great bustard	House mouse	Lactobacillus	0.532
Great bustard	Mosquito	Trypanosoma	1
Great bustard	Mosquito	Campylobacter	0.998
Great bustard	Mosquito	Enterococcus	0.992
Great bustard	Mosquito	Bacteroides	0.992
Great bustard	Mosquito	Fusobacterium	0.876
Great bustard	Mosquito	Eimeria	0.786
Great bustard	Mosquito	Yersinia	0.762
Great bustard	Mosquito	Lactobacillus	0.704
Great bustard	Mosquito	Cryptosporidium	0.678
Great bustard	Mosquito	Stenotrophomonas	0.59
Great bustard	Tick	Enterococcus	1
Great bustard	Tick	Campylobacter	1
Great bustard	Tick	Bacteroides	1
Great bustard	Tick	Trypanosoma	0.994
Great bustard	Tick	Yersinia	0.966
Great bustard	Tick	Fusobacterium	0.916
Great bustard	Tick	Shigella	0.78
Great bustard	Tick	Lactobacillus	0.532
Great bustard	Homo	Enterococcus	1
Great bustard	Homo	Campylobacter	1
Great bustard	Homo	Bacteroides	1
Great bustard	Homo	Trypanosoma	0.994
Great bustard	Homo	Yersinia	0.966
Great bustard	Homo	Fusobacterium	0.916
Great bustard	Homo	Shigella	0.78
Great bustard	Homo	Lactobacillus	0.532
Great bustard	Circus cyaneus	Trypanosoma	1
Great bustard	Circus cyaneus	Bacteroides	1
Great bustard	Circus cyaneus	Enterococcus	0.898
Great bustard	Circus cyaneus	Yersinia	0.878
Great bustard	Circus cyaneus	Cryptosporidium	0.812
Great bustard	Circus cyaneus	Campylobacter	0.806
Great bustard	Circus cyaneus	Stenotrophomonas	0.802
Great bustard	Circus cyaneus	Fusobacterium	0.756
Great bustard	Circus cyaneus	Eimeria	0.736
Great bustard	Circus cyaneus	Lactobacillus	0.724
Chicken	Pig	Yersinia	1
Chicken	Pig	Enterococcus	0.992
Chicken	Pig	Lactobacillus	0.982
Chicken	Pig	Bacteroides	0.958
Chicken	Pig	Listeria	0.956
Chicken	Pig	Clostridioides	0.948
Chicken	Pig	Neisseria	0.93
Chicken	Pig	Acanthamoeba	0.914
Chicken	Pig	Anaplasma	0.856
Chicken	Pig	Retroviridae	0.83
Chicken	Pig	Trypanosoma	0.724
Chicken	Pig	Lactiplantibacillus	0.598
Chicken	Pig	Lachnoclostridium	0.576
Chicken	Eurasian tree sparrow	Yersinia	1
Chicken	Eurasian tree sparrow	Lactobacillus	1
Chicken	Eurasian tree sparrow	Trypanosoma	0.976
Chicken	Eurasian tree sparrow	Enterococcus	0.958
Chicken	Eurasian tree sparrow	Acanthamoeba	0.922
Chicken	Eurasian tree sparrow	Bacteroides	0.824
Chicken	Eurasian tree sparrow	Listeria	0.736
Chicken	Eurasian tree sparrow	Retroviridae	0.516
Chicken	Rock pigeon	Yersinia	1
Chicken	Rock pigeon	Lactobacillus	1
Chicken	Rock pigeon	Trypanosoma	0.97
Chicken	Rock pigeon	Acanthamoeba	0.912
Chicken	Rock pigeon	Bacteroides	0.794
Chicken	Rock pigeon	Enterococcus	0.702
Chicken	Rock pigeon	Retroviridae	0.6
Chicken	Rock pigeon	Neisseria	0.562
Chicken	Rock pigeon	Listeria	0.542
Chicken	Rock pigeon	Fusobacterium	0.504
Chicken	Sheep	Yersinia	1
Chicken	Sheep	Enterococcus	0.992
Chicken	Sheep	Lactobacillus	0.988
Chicken	Sheep	Bacteroides	0.96
Chicken	Sheep	Listeria	0.952
Chicken	Sheep	Clostridioides	0.95
Chicken	Sheep	Neisseria	0.928
Chicken	Sheep	Acanthamoeba	0.888
Chicken	Sheep	Anaplasma	0.86
Chicken	Sheep	Retroviridae	0.848
Chicken	Sheep	Trypanosoma	0.688
Chicken	Sheep	Lactiplantibacillus	0.6
Chicken	Sheep	Lachnoclostridium	0.582
Chicken	Rabbit	Yersinia	1
Chicken	Rabbit	Trypanosoma	0.992
Chicken	Rabbit	Lactobacillus	0.992
Chicken	Rabbit	Enterococcus	0.944
Chicken	Rabbit	Acanthamoeba	0.934
Chicken	Rabbit	Bacteroides	0.852
Chicken	Rabbit	Listeria	0.68
Chicken	Rabbit	Retroviridae	0.586
Chicken	House mouse	Yersinia	1
Chicken	House mouse	Lactobacillus	0.964
Chicken	House mouse	Acanthamoeba	0.928
Chicken	House mouse	Trypanosoma	0.924
Chicken	House mouse	Enterococcus	0.912
Chicken	House mouse	Neisseria	0.746
Chicken	House mouse	Retroviridae	0.684
Chicken	House mouse	Bacteroides	0.628
Chicken	House mouse	Listeria	0.574
Chicken	Mosquito	Yersinia	1
Chicken	Mosquito	Enterococcus	1
Chicken	Mosquito	Lactobacillus	0.956
Chicken	Mosquito	Bacteroides	0.926
Chicken	Mosquito	Acanthamoeba	0.906
Chicken	Mosquito	Shigella	0.9
Chicken	Mosquito	Campylobacter	0.858
Chicken	Mosquito	Anaplasma	0.858
Chicken	Mosquito	Listeria	0.796
Chicken	Mosquito	Trypanosoma	0.782
Chicken	Mosquito	Clostridioides	0.744
Chicken	Mosquito	Neisseria	0.694
Chicken	Mosquito	Brachyspira	0.532
Chicken	Tick	Yersinia	1
Chicken	Tick	Enterococcus	1
Chicken	Tick	Lactobacillus	0.938
Chicken	Tick	Bacteroides	0.936
Chicken	Tick	Acanthamoeba	0.892
Chicken	Tick	Shigella	0.87
Chicken	Tick	Anaplasma	0.868
Chicken	Tick	Campylobacter	0.858
Chicken	Tick	Trypanosoma	0.792
Chicken	Tick	Listeria	0.782
Chicken	Tick	Clostridioides	0.746
Chicken	Tick	Retroviridae	0.73
Chicken	Tick	Chlamydia	0.512
Chicken	Homo	Yersinia	1
Chicken	Homo	Enterococcus	0.908
Chicken	Homo	Acanthamoeba	0.892
Chicken	Homo	Lactobacillus	0.844
Chicken	Homo	Trypanosoma	0.81
Chicken	Homo	Neisseria	0.764
Chicken	Homo	Retroviridae	0.702
Chicken	Homo	Bacteroides	0.676
Chicken	Circus cyaneus	Enterococcus	1
Chicken	Circus cyaneus	Campylobacter	1
Chicken	Circus cyaneus	Bacteroides	1
Chicken	Circus cyaneus	Trypanosoma	0.994
Chicken	Circus cyaneus	Yersinia	0.966
Chicken	Circus cyaneus	Fusobacterium	0.916
Chicken	Circus cyaneus	Shigella	0.78
Chicken	Circus cyaneus	Lactobacillus	0.532
Chicken	Great bustard	Enterococcus	1
Chicken	Great bustard	Campylobacter	1
Chicken	Great bustard	Bacteroides	1
Chicken	Great bustard	Trypanosoma	0.994
Chicken	Great bustard	Yersinia	0.966
Chicken	Great bustard	Fusobacterium	0.916
Chicken	Great bustard	Shigella	0.78
Chicken	Great bustard	Lactobacillus	0.532
Egret	Pig	Yersinia	1
Egret	Pig	Enterococcus	1
Egret	Pig	Campylobacter	0.942
Egret	Pig	Bacteroides	0.926
Egret	Pig	Trypanosoma	0.866
Egret	Pig	Fusobacterium	0.846
Egret	Pig	Shigella	0.82
Egret	Pig	Retroviridae	0.572
Egret	Eurasian tree sparrow	Yersinia	1
Egret	Eurasian tree sparrow	Enterococcus	0.972
Egret	Eurasian tree sparrow	Bacteroides	0.96
Egret	Eurasian tree sparrow	Trypanosoma	0.934
Egret	Eurasian tree sparrow	Fusobacterium	0.84
Egret	Eurasian tree sparrow	Campylobacter	0.822
Egret	Rock pigeon	Yersinia	1
Egret	Rock pigeon	Bacteroides	0.964
Egret	Rock pigeon	Trypanosoma	0.894
Egret	Rock pigeon	Shigella	0.656
Egret	Rock pigeon	Campylobacter	0.612
Egret	Rock pigeon	Fusobacterium	0.61
Egret	Rock pigeon	Circoviridae	0.602
Egret	Rock pigeon	Enterococcus	0.572
Egret	Rock pigeon	Stenotrophomonas	0.552
Egret	Rock pigeon	Cryptosporidium	0.524
Egret	Sheep	Yersinia	1
Egret	Sheep	Enterococcus	1
Egret	Sheep	Bacteroides	0.96
Egret	Sheep	Campylobacter	0.958
Egret	Sheep	Fusobacterium	0.872
Egret	Sheep	Shigella	0.854
Egret	Sheep	Trypanosoma	0.792
Egret	Sheep	Retroviridae	0.574
Egret	Rabbit	Yersinia	1
Egret	Rabbit	Enterococcus	1
Egret	Rabbit	Trypanosoma	0.96
Egret	Rabbit	Bacteroides	0.942
Egret	Rabbit	Fusobacterium	0.854
Egret	Rabbit	Campylobacter	0.77
Egret	Rabbit	Shigella	0.69
Egret	House mouse	Yersinia	1
Egret	House mouse	Enterococcus	0.984
Egret	House mouse	Trypanosoma	0.936
Egret	House mouse	Campylobacter	0.9
Egret	House mouse	Fusobacterium	0.838
Egret	House mouse	Bacteroides	0.78
Egret	House mouse	Shigella	0.712
Egret	House mouse	Retroviridae	0.518
Egret	Mosquito	Yersinia	1
Egret	Mosquito	Enterococcus	1
Egret	Mosquito	Campylobacter	0.99
Egret	Mosquito	Bacteroides	0.984
Egret	Mosquito	Trypanosoma	0.976
Egret	Mosquito	Fusobacterium	0.876
Egret	Mosquito	Shigella	0.87
Egret	Tick	Yersinia	1
Egret	Tick	Trypanosoma	0.996
Egret	Tick	Bacteroides	0.996
Egret	Tick	Enterococcus	0.986
Egret	Tick	Campylobacter	0.97
Egret	Tick	Lactobacillus	0.784
Egret	Tick	Acanthamoeba	0.74
Egret	Tick	Cryptosporidium	0.706
Egret	Tick	Eimeria	0.664
Egret	Tick	Shigella	0.56
Egret	Homo	Yersinia	1
Egret	Homo	Enterococcus	0.998
Egret	Homo	Campylobacter	0.9
Egret	Homo	Bacteroides	0.834
Egret	Homo	Trypanosoma	0.822
Egret	Homo	Fusobacterium	0.766
Egret	Homo	Shigella	0.734
Egret	Homo	Retroviridae	0.57
Egret	Circus cyaneus	Trypanosoma	1
Egret	Circus cyaneus	Bacteroides	1
Egret	Circus cyaneus	Enterococcus	0.898
Egret	Circus cyaneus	Yersinia	0.878
Egret	Circus cyaneus	Cryptosporidium	0.812
Egret	Circus cyaneus	Campylobacter	0.806
Egret	Circus cyaneus	Stenotrophomonas	0.802
Egret	Circus cyaneus	Fusobacterium	0.756
Egret	Circus cyaneus	Eimeria	0.736
Egret	Circus cyaneus	Lactobacillus	0.724
Egret	Great bustard	Trypanosoma	1
Egret	Great bustard	Bacteroides	1
Egret	Great bustard	Enterococcus	0.898
Egret	Great bustard	Yersinia	0.878
Egret	Great bustard	Cryptosporidium	0.812
Egret	Great bustard	Campylobacter	0.806
Egret	Great bustard	Stenotrophomonas	0.802
Egret	Great bustard	Fusobacterium	0.756
Egret	Great bustard	Eimeria	0.736
Egret	Great bustard	Lactobacillus	0.724
Egret	Chicken	Yersinia	1
Egret	Chicken	Enterococcus	0.998
Egret	Chicken	Campylobacter	0.9
Egret	Chicken	Bacteroides	0.834
Egret	Chicken	Trypanosoma	0.822
Egret	Chicken	Fusobacterium	0.766
Egret	Chicken	Shigella	0.734
Egret	Chicken	Retroviridae	0.57
Eurasian eagle owl	Pig	Enterococcus	1
Eurasian eagle owl	Pig	Campylobacter	1
Eurasian eagle owl	Pig	Bacteroides	1
Eurasian eagle owl	Pig	Trypanosoma	0.994
Eurasian eagle owl	Pig	Yersinia	0.966
Eurasian eagle owl	Pig	Fusobacterium	0.916
Eurasian eagle owl	Pig	Shigella	0.78
Eurasian eagle owl	Pig	Lactobacillus	0.532
Eurasian eagle owl	Eurasian tree sparrow	Trypanosoma	1
Eurasian eagle owl	Eurasian tree sparrow	Campylobacter	0.998
Eurasian eagle owl	Eurasian tree sparrow	Enterococcus	0.992
Eurasian eagle owl	Eurasian tree sparrow	Bacteroides	0.992
Eurasian eagle owl	Eurasian tree sparrow	Fusobacterium	0.876
Eurasian eagle owl	Eurasian tree sparrow	Eimeria	0.786
Eurasian eagle owl	Eurasian tree sparrow	Yersinia	0.762
Eurasian eagle owl	Eurasian tree sparrow	Lactobacillus	0.704
Eurasian eagle owl	Eurasian tree sparrow	Cryptosporidium	0.678
Eurasian eagle owl	Eurasian tree sparrow	Stenotrophomonas	0.59
Eurasian eagle owl	Rock pigeon	Trypanosoma	1
Eurasian eagle owl	Rock pigeon	Campylobacter	0.998
Eurasian eagle owl	Rock pigeon	Enterococcus	0.992
Eurasian eagle owl	Rock pigeon	Bacteroides	0.992
Eurasian eagle owl	Rock pigeon	Fusobacterium	0.876
Eurasian eagle owl	Rock pigeon	Eimeria	0.786
Eurasian eagle owl	Rock pigeon	Yersinia	0.762
Eurasian eagle owl	Rock pigeon	Lactobacillus	0.704
Eurasian eagle owl	Rock pigeon	Cryptosporidium	0.678
Eurasian eagle owl	Rock pigeon	Stenotrophomonas	0.59
Eurasian eagle owl	Sheep	Enterococcus	1
Eurasian eagle owl	Sheep	Campylobacter	1
Eurasian eagle owl	Sheep	Bacteroides	1
Eurasian eagle owl	Sheep	Trypanosoma	0.994
Eurasian eagle owl	Sheep	Yersinia	0.966
Eurasian eagle owl	Sheep	Fusobacterium	0.916
Eurasian eagle owl	Sheep	Shigella	0.78
Eurasian eagle owl	Sheep	Lactobacillus	0.532
Eurasian eagle owl	Rabbit	Enterococcus	1
Eurasian eagle owl	Rabbit	Campylobacter	1
Eurasian eagle owl	Rabbit	Bacteroides	1
Eurasian eagle owl	Rabbit	Trypanosoma	0.994
Eurasian eagle owl	Rabbit	Yersinia	0.966
Eurasian eagle owl	Rabbit	Fusobacterium	0.916
Eurasian eagle owl	Rabbit	Shigella	0.78
Eurasian eagle owl	Rabbit	Lactobacillus	0.532
Eurasian eagle owl	House mouse	Trypanosoma	1
Eurasian eagle owl	House mouse	Campylobacter	0.998
Eurasian eagle owl	House mouse	Enterococcus	0.992
Eurasian eagle owl	House mouse	Bacteroides	0.992
Eurasian eagle owl	House mouse	Fusobacterium	0.876
Eurasian eagle owl	House mouse	Eimeria	0.786
Eurasian eagle owl	House mouse	Yersinia	0.762
Eurasian eagle owl	House mouse	Lactobacillus	0.704
Eurasian eagle owl	House mouse	Cryptosporidium	0.678
Eurasian eagle owl	House mouse	Stenotrophomonas	0.59
Eurasian eagle owl	Mosquito	Trypanosoma	1
Eurasian eagle owl	Mosquito	Campylobacter	0.998
Eurasian eagle owl	Mosquito	Enterococcus	0.992
Eurasian eagle owl	Mosquito	Bacteroides	0.992
Eurasian eagle owl	Mosquito	Fusobacterium	0.876
Eurasian eagle owl	Mosquito	Eimeria	0.786
Eurasian eagle owl	Mosquito	Yersinia	0.762
Eurasian eagle owl	Mosquito	Lactobacillus	0.704
Eurasian eagle owl	Mosquito	Cryptosporidium	0.678
Eurasian eagle owl	Mosquito	Stenotrophomonas	0.59
Eurasian eagle owl	Tick	Enterococcus	1
Eurasian eagle owl	Tick	Campylobacter	1
Eurasian eagle owl	Tick	Bacteroides	1
Eurasian eagle owl	Tick	Trypanosoma	0.994
Eurasian eagle owl	Tick	Yersinia	0.966
Eurasian eagle owl	Tick	Fusobacterium	0.916
Eurasian eagle owl	Tick	Shigella	0.78
Eurasian eagle owl	Tick	Lactobacillus	0.532
Eurasian eagle owl	Homo	Enterococcus	1
Eurasian eagle owl	Homo	Campylobacter	1
Eurasian eagle owl	Homo	Bacteroides	1
Eurasian eagle owl	Homo	Trypanosoma	0.994
Eurasian eagle owl	Homo	Yersinia	0.966
Eurasian eagle owl	Homo	Fusobacterium	0.916
Eurasian eagle owl	Homo	Shigella	0.78
Eurasian eagle owl	Homo	Lactobacillus	0.532
Eurasian eagle owl	Circus cyaneus	Trypanosoma	1
Eurasian eagle owl	Circus cyaneus	Bacteroides	1
Eurasian eagle owl	Circus cyaneus	Enterococcus	0.898
Eurasian eagle owl	Circus cyaneus	Yersinia	0.878
Eurasian eagle owl	Circus cyaneus	Cryptosporidium	0.812
Eurasian eagle owl	Circus cyaneus	Campylobacter	0.806
Eurasian eagle owl	Circus cyaneus	Stenotrophomonas	0.802
Eurasian eagle owl	Circus cyaneus	Fusobacterium	0.756
Eurasian eagle owl	Circus cyaneus	Eimeria	0.736
Eurasian eagle owl	Circus cyaneus	Lactobacillus	0.724
Eurasian eagle owl	Great bustard	Trypanosoma	1
Eurasian eagle owl	Great bustard	Bacteroides	1
Eurasian eagle owl	Great bustard	Enterococcus	0.898
Eurasian eagle owl	Great bustard	Yersinia	0.878
Eurasian eagle owl	Great bustard	Cryptosporidium	0.812
Eurasian eagle owl	Great bustard	Campylobacter	0.806
Eurasian eagle owl	Great bustard	Stenotrophomonas	0.802
Eurasian eagle owl	Great bustard	Fusobacterium	0.756
Eurasian eagle owl	Great bustard	Eimeria	0.736
Eurasian eagle owl	Great bustard	Lactobacillus	0.724
Eurasian eagle owl	Chicken	Enterococcus	1
Eurasian eagle owl	Chicken	Campylobacter	1
Eurasian eagle owl	Chicken	Bacteroides	1
Eurasian eagle owl	Chicken	Trypanosoma	0.994
Eurasian eagle owl	Chicken	Yersinia	0.966
Eurasian eagle owl	Chicken	Fusobacterium	0.916
Eurasian eagle owl	Chicken	Shigella	0.78
Eurasian eagle owl	Chicken	Lactobacillus	0.532
Eurasian eagle owl	Egret	Trypanosoma	1
Eurasian eagle owl	Egret	Bacteroides	1
Eurasian eagle owl	Egret	Enterococcus	0.898
Eurasian eagle owl	Egret	Yersinia	0.878
Eurasian eagle owl	Egret	Cryptosporidium	0.812
Eurasian eagle owl	Egret	Campylobacter	0.806
Eurasian eagle owl	Egret	Stenotrophomonas	0.802
Eurasian eagle owl	Egret	Fusobacterium	0.756
Eurasian eagle owl	Egret	Eimeria	0.736
Eurasian eagle owl	Egret	Lactobacillus	0.724
Daurian ground squirrel	Pig	Yersinia	1
Daurian ground squirrel	Pig	Enterococcus	1
Daurian ground squirrel	Pig	Bacteroides	0.924
Daurian ground squirrel	Pig	Lactobacillus	0.902
Daurian ground squirrel	Pig	Trypanosoma	0.872
Daurian ground squirrel	Pig	Acanthamoeba	0.848
Daurian ground squirrel	Pig	Fusobacterium	0.828
Daurian ground squirrel	Pig	Campylobacter	0.75
Daurian ground squirrel	Pig	Listeria	0.694
Daurian ground squirrel	Pig	Mycoplasma	0.692
Daurian ground squirrel	Pig	Brachyspira	0.668
Daurian ground squirrel	Pig	Lactococcus	0.596
Daurian ground squirrel	Eurasian tree sparrow	Yersinia	1
Daurian ground squirrel	Eurasian tree sparrow	Lactobacillus	0.996
Daurian ground squirrel	Eurasian tree sparrow	Trypanosoma	0.992
Daurian ground squirrel	Eurasian tree sparrow	Acanthamoeba	0.936
Daurian ground squirrel	Eurasian tree sparrow	Enterococcus	0.926
Daurian ground squirrel	Eurasian tree sparrow	Bacteroides	0.852
Daurian ground squirrel	Eurasian tree sparrow	Listeria	0.654
Daurian ground squirrel	Eurasian tree sparrow	Retroviridae	0.54
Daurian ground squirrel	Rock pigeon	Yersinia	1
Daurian ground squirrel	Rock pigeon	Trypanosoma	0.914
Daurian ground squirrel	Rock pigeon	Enterococcus	0.872
Daurian ground squirrel	Rock pigeon	Acanthamoeba	0.85
Daurian ground squirrel	Rock pigeon	Lactobacillus	0.796
Daurian ground squirrel	Rock pigeon	Bacteroides	0.786
Daurian ground squirrel	Rock pigeon	Campylobacter	0.644
Daurian ground squirrel	Rock pigeon	Bordetella	0.504
Daurian ground squirrel	Sheep	Yersinia	1
Daurian ground squirrel	Sheep	Enterococcus	1
Daurian ground squirrel	Sheep	Bacteroides	0.928
Daurian ground squirrel	Sheep	Lactobacillus	0.902
Daurian ground squirrel	Sheep	Acanthamoeba	0.836
Daurian ground squirrel	Sheep	Fusobacterium	0.828
Daurian ground squirrel	Sheep	Trypanosoma	0.812
Daurian ground squirrel	Sheep	Campylobacter	0.744
Daurian ground squirrel	Sheep	Listeria	0.694
Daurian ground squirrel	Sheep	Mycoplasma	0.69
Daurian ground squirrel	Sheep	Brachyspira	0.668
Daurian ground squirrel	Sheep	Lactococcus	0.538
Daurian ground squirrel	Rabbit	Yersinia	1
Daurian ground squirrel	Rabbit	Enterococcus	0.992
Daurian ground squirrel	Rabbit	Bacteroides	0.936
Daurian ground squirrel	Rabbit	Lactobacillus	0.904
Daurian ground squirrel	Rabbit	Trypanosoma	0.9
Daurian ground squirrel	Rabbit	Acanthamoeba	0.854
Daurian ground squirrel	Rabbit	Fusobacterium	0.82
Daurian ground squirrel	Rabbit	Listeria	0.69
Daurian ground squirrel	Rabbit	Mycoplasma	0.684
Daurian ground squirrel	Rabbit	Brachyspira	0.652
Daurian ground squirrel	Rabbit	Campylobacter	0.568
Daurian ground squirrel	House mouse	Yersinia	1
Daurian ground squirrel	House mouse	Lactobacillus	1
Daurian ground squirrel	House mouse	Trypanosoma	0.984
Daurian ground squirrel	House mouse	Enterococcus	0.958
Daurian ground squirrel	House mouse	Acanthamoeba	0.934
Daurian ground squirrel	House mouse	Listeria	0.738
Daurian ground squirrel	House mouse	Fusobacterium	0.66
Daurian ground squirrel	House mouse	Mycoplasma	0.632
Daurian ground squirrel	House mouse	Bacteroides	0.626
Daurian ground squirrel	House mouse	Retroviridae	0.518
Daurian ground squirrel	House mouse	Lactococcus	0.518
Daurian ground squirrel	Mosquito	Yersinia	1
Daurian ground squirrel	Mosquito	Trypanosoma	0.986
Daurian ground squirrel	Mosquito	Enterococcus	0.982
Daurian ground squirrel	Mosquito	Lactobacillus	0.934
Daurian ground squirrel	Mosquito	Bacteroides	0.92
Daurian ground squirrel	Mosquito	Campylobacter	0.912
Daurian ground squirrel	Mosquito	Acanthamoeba	0.874
Daurian ground squirrel	Mosquito	Eimeria	0.604
Daurian ground squirrel	Mosquito	Cryptosporidium	0.604
Daurian ground squirrel	Mosquito	Listeria	0.594
Daurian ground squirrel	Mosquito	Fusobacterium	0.594
Daurian ground squirrel	Mosquito	Flaviviridae	0.536
Daurian ground squirrel	Tick	Yersinia	1
Daurian ground squirrel	Tick	Trypanosoma	1
Daurian ground squirrel	Tick	Bacteroides	0.994
Daurian ground squirrel	Tick	Enterococcus	0.96
Daurian ground squirrel	Tick	Lactobacillus	0.946
Daurian ground squirrel	Tick	Campylobacter	0.92
Daurian ground squirrel	Tick	Acanthamoeba	0.866
Daurian ground squirrel	Tick	Eimeria	0.758
Daurian ground squirrel	Tick	Cryptosporidium	0.718
Daurian ground squirrel	Tick	Listeria	0.57
Daurian ground squirrel	Homo	Yersinia	1
Daurian ground squirrel	Homo	Enterococcus	0.998
Daurian ground squirrel	Homo	Acanthamoeba	0.86
Daurian ground squirrel	Homo	Bacteroides	0.812
Daurian ground squirrel	Homo	Trypanosoma	0.764
Daurian ground squirrel	Homo	Lactobacillus	0.716
Daurian ground squirrel	Homo	Campylobacter	0.606
Daurian ground squirrel	Homo	Brachyspira	0.566
Daurian ground squirrel	Homo	Listeria	0.514
Daurian ground squirrel	Circus cyaneus	Trypanosoma	1
Daurian ground squirrel	Circus cyaneus	Campylobacter	0.998
Daurian ground squirrel	Circus cyaneus	Enterococcus	0.992
Daurian ground squirrel	Circus cyaneus	Bacteroides	0.992
Daurian ground squirrel	Circus cyaneus	Fusobacterium	0.876
Daurian ground squirrel	Circus cyaneus	Eimeria	0.786
Daurian ground squirrel	Circus cyaneus	Yersinia	0.762
Daurian ground squirrel	Circus cyaneus	Lactobacillus	0.704
Daurian ground squirrel	Circus cyaneus	Cryptosporidium	0.678
Daurian ground squirrel	Circus cyaneus	Stenotrophomonas	0.59
Daurian ground squirrel	Great bustard	Enterococcus	1
Daurian ground squirrel	Great bustard	Campylobacter	1
Daurian ground squirrel	Great bustard	Bacteroides	1
Daurian ground squirrel	Great bustard	Trypanosoma	0.994
Daurian ground squirrel	Great bustard	Yersinia	0.966
Daurian ground squirrel	Great bustard	Fusobacterium	0.916
Daurian ground squirrel	Great bustard	Shigella	0.78
Daurian ground squirrel	Great bustard	Lactobacillus	0.532
Daurian ground squirrel	Chicken	Yersinia	1
Daurian ground squirrel	Chicken	Enterococcus	0.998
Daurian ground squirrel	Chicken	Acanthamoeba	0.86
Daurian ground squirrel	Chicken	Bacteroides	0.812
Daurian ground squirrel	Chicken	Trypanosoma	0.764
Daurian ground squirrel	Chicken	Lactobacillus	0.716
Daurian ground squirrel	Chicken	Campylobacter	0.606
Daurian ground squirrel	Chicken	Brachyspira	0.566
Daurian ground squirrel	Chicken	Listeria	0.514
Daurian ground squirrel	Egret	Yersinia	1
Daurian ground squirrel	Egret	Enterococcus	0.998
Daurian ground squirrel	Egret	Trypanosoma	0.96
Daurian ground squirrel	Egret	Bacteroides	0.942
Daurian ground squirrel	Egret	Campylobacter	0.87
Daurian ground squirrel	Egret	Fusobacterium	0.852
Daurian ground squirrel	Egret	Shigella	0.63
Daurian ground squirrel	Eurasian eagle owl	Trypanosoma	1
Daurian ground squirrel	Eurasian eagle owl	Campylobacter	0.998
Daurian ground squirrel	Eurasian eagle owl	Enterococcus	0.992
Daurian ground squirrel	Eurasian eagle owl	Bacteroides	0.992
Daurian ground squirrel	Eurasian eagle owl	Fusobacterium	0.876
Daurian ground squirrel	Eurasian eagle owl	Eimeria	0.786
Daurian ground squirrel	Eurasian eagle owl	Yersinia	0.762
Daurian ground squirrel	Eurasian eagle owl	Lactobacillus	0.704
Daurian ground squirrel	Eurasian eagle owl	Cryptosporidium	0.678
Daurian ground squirrel	Eurasian eagle owl	Stenotrophomonas	0.59
Cattle	Pig	Yersinia	1
Cattle	Pig	Lactobacillus	0.998
Cattle	Pig	Retroviridae	0.954
Cattle	Pig	Listeria	0.954
Cattle	Pig	Enterococcus	0.948
Cattle	Pig	Clostridioides	0.948
Cattle	Pig	Anaplasma	0.916
Cattle	Pig	Neisseria	0.874
Cattle	Pig	Shigella	0.86
Cattle	Pig	Bacteroides	0.854
Cattle	Pig	Mycoplasma	0.826
Cattle	Pig	Fusobacterium	0.816
Cattle	Pig	Campylobacter	0.8
Cattle	Pig	Lactococcus	0.762
Cattle	Pig	Brachyspira	0.716
Cattle	Pig	Acanthamoeba	0.674
Cattle	Pig	Lachnoclostridium	0.668
Cattle	Pig	Trypanosoma	0.648
Cattle	Pig	Eggerthia	0.608
Cattle	Pig	Lactiplantibacillus	0.58
Cattle	Eurasian tree sparrow	Yersinia	1
Cattle	Eurasian tree sparrow	Lactobacillus	0.918
Cattle	Eurasian tree sparrow	Enterococcus	0.908
Cattle	Eurasian tree sparrow	Trypanosoma	0.866
Cattle	Eurasian tree sparrow	Acanthamoeba	0.832
Cattle	Eurasian tree sparrow	Neisseria	0.766
Cattle	Eurasian tree sparrow	Bacteroides	0.754
Cattle	Eurasian tree sparrow	Retroviridae	0.672
Cattle	Eurasian tree sparrow	Listeria	0.514
Cattle	Rock pigeon	Yersinia	1
Cattle	Rock pigeon	Lactobacillus	0.954
Cattle	Rock pigeon	Bacteroides	0.94
Cattle	Rock pigeon	Trypanosoma	0.926
Cattle	Rock pigeon	Neisseria	0.766
Cattle	Rock pigeon	Retroviridae	0.764
Cattle	Rock pigeon	Acanthamoeba	0.684
Cattle	Rock pigeon	Shigella	0.608
Cattle	Rock pigeon	Enterococcus	0.584
Cattle	Rock pigeon	Eimeria	0.532
Cattle	Sheep	Yersinia	1
Cattle	Sheep	Neisseria	0.99
Cattle	Sheep	Lactobacillus	0.972
Cattle	Sheep	Anaplasma	0.95
Cattle	Sheep	Retroviridae	0.93
Cattle	Sheep	Shigella	0.928
Cattle	Sheep	Clostridioides	0.928
Cattle	Sheep	Listeria	0.916
Cattle	Sheep	Campylobacter	0.898
Cattle	Sheep	Mycoplasma	0.892
Cattle	Sheep	Enterococcus	0.882
Cattle	Sheep	Lactococcus	0.878
Cattle	Sheep	Fusobacterium	0.852
Cattle	Sheep	Eggerthia	0.798
Cattle	Sheep	Chlamydia	0.726
Cattle	Sheep	Bacteroides	0.64
Cattle	Sheep	Poxviridae	0.596
Cattle	Sheep	Lachnoclostridium	0.558
Cattle	Sheep	Brachyspira	0.516
Cattle	Rabbit	Yersinia	1
Cattle	Rabbit	Enterococcus	0.998
Cattle	Rabbit	Lactobacillus	0.996
Cattle	Rabbit	Listeria	0.948
Cattle	Rabbit	Clostridioides	0.946
Cattle	Rabbit	Retroviridae	0.908
Cattle	Rabbit	Anaplasma	0.9
Cattle	Rabbit	Bacteroides	0.832
Cattle	Rabbit	Acanthamoeba	0.802
Cattle	Rabbit	Shigella	0.76
Cattle	Rabbit	Mycoplasma	0.742
Cattle	Rabbit	Fusobacterium	0.738
Cattle	Rabbit	Neisseria	0.686
Cattle	Rabbit	Trypanosoma	0.644
Cattle	Rabbit	Brachyspira	0.638
Cattle	House mouse	Yersinia	1
Cattle	House mouse	Lactobacillus	1
Cattle	House mouse	Neisseria	0.972
Cattle	House mouse	Anaplasma	0.936
Cattle	House mouse	Enterococcus	0.928
Cattle	House mouse	Mycoplasma	0.918
Cattle	House mouse	Retroviridae	0.914
Cattle	House mouse	Clostridioides	0.914
Cattle	House mouse	Listeria	0.9
Cattle	House mouse	Shigella	0.898
Cattle	House mouse	Campylobacter	0.872
Cattle	House mouse	Lactococcus	0.868
Cattle	House mouse	Fusobacterium	0.854
Cattle	House mouse	Chlamydia	0.734
Cattle	House mouse	Eggerthia	0.73
Cattle	House mouse	Trypanosoma	0.54
Cattle	House mouse	Acanthamoeba	0.538
Cattle	House mouse	Flaviviridae	0.506
Cattle	Mosquito	Yersinia	1
Cattle	Mosquito	Enterococcus	1
Cattle	Mosquito	Shigella	0.962
Cattle	Mosquito	Lactobacillus	0.96
Cattle	Mosquito	Bacteroides	0.926
Cattle	Mosquito	Campylobacter	0.882
Cattle	Mosquito	Acanthamoeba	0.86
Cattle	Mosquito	Anaplasma	0.858
Cattle	Mosquito	Trypanosoma	0.846
Cattle	Mosquito	Listeria	0.798
Cattle	Mosquito	Clostridioides	0.748
Cattle	Mosquito	Neisseria	0.608
Cattle	Mosquito	Brachyspira	0.51
Cattle	Tick	Yersinia	1
Cattle	Tick	Enterococcus	1
Cattle	Tick	Lactobacillus	0.938
Cattle	Tick	Bacteroides	0.936
Cattle	Tick	Campylobacter	0.908
Cattle	Tick	Shigella	0.904
Cattle	Tick	Anaplasma	0.868
Cattle	Tick	Trypanosoma	0.786
Cattle	Tick	Listeria	0.78
Cattle	Tick	Clostridioides	0.748
Cattle	Tick	Retroviridae	0.73
Cattle	Tick	Acanthamoeba	0.628
Cattle	Tick	Mitoviridae	0.572
Cattle	Tick	Pseudoloma	0.534
Cattle	Tick	Chlamydia	0.524
Cattle	Homo	Yersinia	1
Cattle	Homo	Enterococcus	1
Cattle	Homo	Shigella	0.922
Cattle	Homo	Campylobacter	0.902
Cattle	Homo	Anaplasma	0.836
Cattle	Homo	Acanthamoeba	0.822
Cattle	Homo	Brachyspira	0.744
Cattle	Homo	Retroviridae	0.734
Cattle	Homo	Neisseria	0.63
Cattle	Circus cyaneus	Enterococcus	1
Cattle	Circus cyaneus	Campylobacter	1
Cattle	Circus cyaneus	Bacteroides	1
Cattle	Circus cyaneus	Trypanosoma	0.994
Cattle	Circus cyaneus	Yersinia	0.966
Cattle	Circus cyaneus	Fusobacterium	0.916
Cattle	Circus cyaneus	Shigella	0.78
Cattle	Circus cyaneus	Lactobacillus	0.532
Cattle	Great bustard	Enterococcus	1
Cattle	Great bustard	Campylobacter	1
Cattle	Great bustard	Bacteroides	1
Cattle	Great bustard	Trypanosoma	0.994
Cattle	Great bustard	Yersinia	0.966
Cattle	Great bustard	Fusobacterium	0.916
Cattle	Great bustard	Shigella	0.78
Cattle	Great bustard	Lactobacillus	0.532
Cattle	Chicken	Yersinia	1
Cattle	Chicken	Lactobacillus	0.992
Cattle	Chicken	Enterococcus	0.948
Cattle	Chicken	Bacteroides	0.932
Cattle	Chicken	Neisseria	0.93
Cattle	Chicken	Listeria	0.916
Cattle	Chicken	Clostridioides	0.904
Cattle	Chicken	Anaplasma	0.856
Cattle	Chicken	Retroviridae	0.85
Cattle	Chicken	Acanthamoeba	0.828
Cattle	Chicken	Trypanosoma	0.766
Cattle	Chicken	Lactiplantibacillus	0.57
Cattle	Chicken	Lachnoclostridium	0.554
Cattle	Egret	Yersinia	1
Cattle	Egret	Enterococcus	1
Cattle	Egret	Bacteroides	0.974
Cattle	Egret	Campylobacter	0.94
Cattle	Egret	Trypanosoma	0.9
Cattle	Egret	Fusobacterium	0.868
Cattle	Egret	Shigella	0.866
Cattle	Egret	Retroviridae	0.578
Cattle	Eurasian eagle owl	Enterococcus	1
Cattle	Eurasian eagle owl	Campylobacter	1
Cattle	Eurasian eagle owl	Bacteroides	1
Cattle	Eurasian eagle owl	Trypanosoma	0.994
Cattle	Eurasian eagle owl	Yersinia	0.966
Cattle	Eurasian eagle owl	Fusobacterium	0.916
Cattle	Eurasian eagle owl	Shigella	0.78
Cattle	Eurasian eagle owl	Lactobacillus	0.532
Cattle	Daurian ground squirrel	Yersinia	1
Cattle	Daurian ground squirrel	Enterococcus	1
Cattle	Daurian ground squirrel	Bacteroides	0.942
Cattle	Daurian ground squirrel	Trypanosoma	0.894
Cattle	Daurian ground squirrel	Lactobacillus	0.882
Cattle	Daurian ground squirrel	Fusobacterium	0.828
Cattle	Daurian ground squirrel	Acanthamoeba	0.788
Cattle	Daurian ground squirrel	Campylobacter	0.728
Cattle	Daurian ground squirrel	Listeria	0.684
Cattle	Daurian ground squirrel	Brachyspira	0.654
Cattle	Daurian ground squirrel	Mycoplasma	0.648
